# Supplementary material for: Daily Estimates of Global Radiation in the Brazilian Amazon by Simplified Models
Source: Preprints.org preprint supplement (doi:10.20944/preprints202410.0375.v1), 2024-10-07
Supplement: Supplementary file 1 [file supplementary]

**Supplementary material for the article "Daily Estimates of Global Radiation in the Brazilian Amazon by Simplified Models"**

**GROUP I**

Table 8. Coefficients of the model 1 Group I adjusted for the 20 weather stations (p-value 0.01*, 0.05** and not significantns).

| Weather Station | Coefficients | | | Índices Estatísticos | | |
| --- | --- | --- | --- | --- | --- | --- |
| a | b | R^2 | MBE | RMSE | d |
| Rio Branco | 0.2613* | 0.4679* | 0.7568 | 0.088 | 2.43 | 0.9229 |
| Macapá | 0.2556* | 0.5091* | 0.8839 | 0.051 | 1.79 | 0.9687 |
| Barcelos | 0.2880* | 0.4773* | 0.7657 | 0.046 | 2.53 | 0.9299 |
| Eirunepé | 0.2844* | 0.4525* | 0.7143 | 0.127 | 2.14 | 0.9194 |
| Itacoatiara | 0.2279* | 0.4581* | 0.8062 | 0.037 | 2.27 | 0.9423 |
| Lábrea | 0.3163* | 0.3818* | 0.7420 | 0.077 | 2.04 | 0.9082 |
| Manaus | 0.2413* | 0.4675* | 0.7750 | 0.089 | 2.30 | 0.9402 |
| Parintins | 0.2350* | 0.4945* | 0.8710 | -0.006 | 2.00 | 0.9608 |
| S. G. da Cachoeira | 0.2335* | 0.4755* | 0.7527 | 0.067 | 2.38 | 0.9262 |
| Sinop | 0.3306* | 0.4136* | 0.6331 | 0.080 | 2.62 | 0.8737 |
| Belém | 0.2202* | 0.3671* | 0.6563 | -0.091 | 2.15 | 0.8885 |
| Cametá | 0.2788* | 0.4493* | 0.8332 | 0.016 | 1.61 | 0.9464 |
| Conceição do Araguaia | 0.2597* | 0.4574* | 0.8032 | -0.068 | 1.96 | 0.9440 |
| Itaituba | 0.2826* | 0.4626* | 0.8573 | 0.104 | 1.73 | 0.9634 |
| Marabá | 0.2923* | 0.4133* | 0.7843 | -0.079 | 1.82 | 0.9347 |
| Monte Alegre | 0.2730* | 0.4751* | 0.8886 | 0.022 | 1.34 | 0.9723 |
| Óbidos | 0.2320* | 0.4079* | 0.7864 | -0.065 | 2.03 | 0.9398 |
| Soure | 0.3377* | 0.3707* | 0.8176 | -0.117 | 1.89 | 0.9447 |
| Tucuruí | 0.2876* | 0.3541* | 0.6856 | -0.060 | 2.00 | 0.8932 |
| Boa Vista | 0.3019* | 0.4346* | 0.8339 | 0.052 | 1.81 | 0.9517 |

Table 9. Coefficients of the model 2 Group I adjusted for the 20 weather stations (p-value 0.01*. 0.05** and not significant ns).

| Weather Station | Coefficients | | | | Índices Estatísticos | | |
| --- | --- | --- | --- | --- | --- | --- | --- |
| a | b | c | R^2 | MBE | RMSE | d |
| Rio Branco | 0.2353* | 0.6561* | -0.2175* | 0.7674 | 0.062 | 2.36 | 0.9284 |
| Macapá | 0.2205* | 0.7395* | -0.2402* | 0.8950 | 0.057 | 1.69 | 0.9720 |
| Barcelos | 0.2513* | 0.7893* | -0.3850* | 0.7936 | 0.074 | 2.32 | 0.9431 |
| Eirunepé | 0.2527* | 0.7484* | -0.4112* | 0.7469 | 0.139 | 2.01 | 0.9324 |
| Itacoatiara | 0.2001* | 0.6761* | -0.2497* | 0.8194 | 0.031 | 2.17 | 0.9479 |
| Lábrea | 0.2920* | 0.5721* | -0.2305* | 0.7578 | 0.096 | 2.02 | 0.9106 |
| Manaus | 0.2200* | 0.6266* | -0.1827* | 0.7823 | 0.081 | 2.27 | 0.9420 |
| Parintins | 0.1966* | 0.7531* | -0.2722* | 0.8882 | 0.048 | 1.94 | 0.9634 |
| S. G. da Cachoeira | 0.2043* | 0.7067* | -0.2952* | 0.7672 | 0.040 | 2.29 | 0.9329 |
| Sinop | 0.3202* | 0.4840* | -0.0785* | 0.6348 | 0.075 | 2.59 | 0.8778 |
| Belém | 0.2273* | 0.3258* | 0.0441* | 0.6569 | -0.089 | 2.14 | 0.8897 |
| Cametá | 0.2407* | 0.6512* | -0.2006* | 0.8439 | 0.017 | 1.55 | 0.9505 |
| Conceição do Araguaia | 0.2254* | 0.6642* | -0.2087* | 0.8174 | -0.102 | 1.91 | 0.9484 |
| Itaituba | 0.2371* | 0.7699* | -0.3359* | 0.8856 | 0.063 | 1.50 | 0.9735 |
| Marabá | 0.2616* | 0.6127* | -0.2149* | 0.8015 | -0.086 | 1.76 | 0.9399 |
| Monte Alegre | 0.2314* | 0.7094* | -0.2352* | 0.9013 | 0.013 | 1.27 | 0.9755 |
| Óbidos | 0.2136* | 0.5291* | -0.1278* | 0.7908 | -0.047 | 2.00 | 0.9413 |
| Soure | 0.3104* | 0.5722* | -0.2115* | 0.8323 | -0.110 | 1.81 | 0.9494 |
| Tucuruí | 0.2755* | 0.4234* | -0.0736* | 0.6876 | -0.066 | 1.98 | 0.8960 |
| Boa Vista | 0.2750* | 0.5883* | -0.1606* | 0.8395 | 0.055 | 1.79 | 0.9534 |

Table 10. Coefficients of the model 3 Group I adjusted for the 20 weather stations (p-value 0.01*. 0.05** and not significant ns).

| Weather Station | Coefficients | | | | | Índices Estatísticos | | |
| --- | --- | --- | --- | --- | --- | --- | --- | --- |
| a | b | c | d | R^2 | MBE | RMSE | d |
| Rio Branco | 0.2263* | 0.812* | -0.6850* | 0.3620* | 0.7690 | 0.0705 | 2.33 | 0.9298 |
| Macapá | ns | ns | ns | ns | - | - | - | - |
| Barcelos | 0.2359* | 1.10* | -1.36* | 0.7856* | 0.7994 | 0.0686 | 2.29 | 0.9448 |
| Eirunepé | 0.2398* | 1.01* | -1.35* | 0.8342* | 0.7534 | 0.1248 | 1.99 | 0.9340 |
| Itacoatiara | 0.1911* | 0.8521* | -0.7781* | 0.4045* | 0.8211 | 0.0303 | 2.17 | 0.9482 |
| Lábrea | 0.2842* | 0.7291* | -0.7397* | 0.4183* | 0.7601 | 0.1144 | 2.02 | 0.9102 |
| Manaus | 0.2109* | 0.7920* | -0.6755* | 0.3763* | 0.7840 | 0.0848 | 2.26 | 0.9427 |
| Parintins | 0.1838* | 0.9647* | -0.8592* | 0.4191* | 0.8906 | 0.0511 | 1.93 | 0.9635 |
| S. G. da Cachoeira | 0.1939* | 0.9086* | -0.9571* | 0.5583* | 0.7696 | 0.0442 | 2.30 | 0.9327 |
| Sinop | 0.3058* | 0.7062* | -0.7365* | 0.5096* | 0.6381 | 0.0793 | 2.58 | 0.8787 |
| Belém | 0.1950* | 0.7587* | -1.13* | 0.8738* | 0.6696 | -0.0913 | 2.10 | 0.8946 |
| Cametá | 0.2278* | 0.8178* | -0.6265* | 0.2963* | 0.8452 | 0.0218 | 1.54 | 0.9510 |
| Conceição do Araguaia | 0.2129* | 0.8538* | -0.7175* | 0.3562* | 0.8197 | -0.0842 | 1.91 | 0.9483 |
| Itaituba | 0.2284* | 0.9154* | -0.7533* | 0.3109* | 0.8869 | 0.0527 | 1.48 | 0.9742 |
| Marabá | 0.2453* | 0.8711* | -0.9370* | 0.5269* | 0.8073 | -0.0916 | 1.74 | 0.9417 |
| Monte Alegre | 0.2204* | 0.8623* | -0.6383* | 0.2852* | 0.9023 | 0.0115 | 1.26 | 0.9758 |
| Óbidos | 0.1996* | 0.7644* | -0.7910* | 0.4845* | 0.7943 | -0.0670 | 2.01 | 0.9411 |
| Soure | 0.2909* | 0.9235* | -1.17* | 0.6831* | 0.8411 | -0.1069 | 1.74 | 0.9534 |
| Tucuruí | 0.2615* | 0.5987* | -0.5409* | 0.3380* | 0.6901 | -0.0674 | 1.97 | 0.8970 |
| Boa Vista | 0.2537* | 0.8630* | -0.8987* | 0.5372* | 0.8429 | 0.0532 | 1.76 | 0.9552 |

Table 11. Coefficients of the model 4 Group I adjusted for the 20 weather stations (p-value 0.01*, 0.05** and not significantns).

| Weather Station | Coefficients | | | | Índices Estatísticos | | |
| --- | --- | --- | --- | --- | --- | --- | --- |
| a | b | c | R^2 | MBE | RMSE | d |
| Rio Branco | 1.25ns | 0.5623ns | 4.15* | 0.5436 | **-** | **-** | **-** |
| Macapá | 0.9825ns | 0.8964ns | 3.17* | 0.4123 | **-** | **-** | **-** |
| Barcelos | 0.7594ns | 0.5521ns | 5.01* | 0.4426 | **-** | **-** | **-** |
| Eirunepé | 1.55ns | 0.2361ns | 3.69* | 0.6521 | **-** | **-** | **-** |
| Itacoatiara | 1.98ns | 0.7469ns | 4.25* | 0.3125 | **-** | **-** | **-** |
| Lábrea | 1.36* | 1.24ns | 2.63* | 0.3894 | **-** | **-** | **-** |
| Manaus | 2.65* | 0.8823ns | 6.21* | 0.5421 | **-** | **-** | **-** |
| Parintins | 1.56* | 0.7894* | 3.05ns | 0.5871 | **-** | **-** | **-** |
| S. G. da Cachoeira | 0.8756ns | 0.9214ns | 4.21* | 0.4436 | **-** | **-** | **-** |
| Sinop | 1.14ns | 2.14ns | 6.02* | 0.5123 | **-** | **-** | **-** |
| Belém | 1.12ns | 1.98ns | 5.21* | 0.4128 | **-** | **-** | **-** |
| Cametá | 1.65* | 1.56ns | 4.12* | 0.3621 | **-** | **-** | **-** |
| Conceição do Araguaia | 1.74* | 2.05ns | 5.06* | 0.3794 | **-** | **-** | **-** |
| Itaituba | 0.3612** | 1.41ns | 7.01ns | 0.5123 | **-** | **-** | **-** |
| Marabá | 1.32* | 0.8961ns | 5.32ns | 0.5232 | **-** | **-** | **-** |
| Monte Alegre | 1.55* | 0.9962ns | 3.14ns | 0.5123 | **-** | **-** | **-** |
| Óbidos | 1.89* | 0.8721ns | 5.18ns | 0.4896 | **-** | **-** | **-** |
| Soure | 0.6541* | 1.55ns | 3.25ns | 0.4562 | **-** | **-** | **-** |
| Tucuruí | 0.8759* | 1.23ns | 4.78ns | 0.3987 | **-** | **-** | **-** |
| Boa Vista | 0.7723* | 1.75ns | 2.14ns | 0.4121 | **-** | **-** | **-** |

Table 12. Coefficients of the model 5 Group I adjusted for the 20 weather stations (p-value 0.01*, 0.05** and not significantns).

| Weather Station | Coefficients | | | | Índices Estatísticos | | |
| --- | --- | --- | --- | --- | --- | --- | --- |
| a | b | c | R^2 | MBE | RMSE | d |
| Rio Branco | 0.5669* | -11.34* | 17.16* | 0.7475 | 0.080 | 2.48 | 0.9194 |
| Macapá | 0.3219* | -2.43ns | 18.44* | 0.8831 | **-** | **-** | **-** |
| Barcelos | 0.5364* | -8.97* | 17.22* | 0.7645 | 0.041 | 2.54 | 0.9293 |
| Eirunepé | 0.4522* | -6.12* | 16.28* | 0.7065 | 0.138 | 2.18 | 0.9162 |
| Itacoatiara | 0.5209* | -10.66* | 16.62* | 0.8020 | 0.037 | 2.29 | 0.9411 |
| Lábrea | 0.6439* | -12.13* | 14.26* | 0.7362 | 0.038 | 2.05 | 0.9115 |
| Manaus | 0.3228* | -2.86* | 16.60* | 0.7753 | 0.103 | 2.29 | 0.9396 |
| Parintins | 0.6904* | -16.54* | 18.00* | 0.8685 | -0.037 | 1.99 | 0.9614 |
| S. G. da Cachoeira | 0.4703* | -8.56* | 17.22* | 0.7522 | 0.070 | 2.39 | 0.9257 |
| Sinop | 0.5915* | -9.81* | 15.23* | 0.6210 | 0.079 | 2.67 | 0.8669 |
| Belém | 0.2680* | -1.65ns | 13.05* | 0.6607 | - | - | - |
| Cametá | 0.5523* | -9.95* | 16.28* | 0.8301 | 0.019 | 1.63 | 0.9446 |
| Conceição do Araguaia | 0.6596* | -15.07* | 17.23* | 0.7974 | -0.082 | 2.01 | 0.9421 |
| Itaituba | 0.5772* | -10.79* | 16.85* | 0.8533 | 0.114 | 1.77 | 0.9613 |
| Marabá | 0.5255* | -8.54* | 14.90* | 0.7753 | -0.074 | 1.84 | 0.9323 |
| Monte Alegre | 0.5154* | -8.85* | 17.27* | 0.8895 | 0.030 | 1.34 | 0.9721 |
| Óbidos | 0.4784* | -8.99* | 14.83* | 0.7834 | -0.075 | 2.03 | 0.9396 |
| Soure | 0.4651* | -4.61* | 13.35* | 0.8169 | -0.111 | 1.90 | 0.9435 |
| Tucuruí | 0.6884* | -14.86* | 13.40* | 0.6908 | -0.077 | 1.99 | 0.8979 |
| Boa Vista | 0.3969* | -3.47* | 15.84* | 0.8409 | 0.062 | 1.78 | 0.9535 |

Table 13. Coefficients of the model 6 Group I adjusted for the 20 weather stations (p-value 0.01*, 0.05** and not significantns).

| Weather Station | Coefficients | | | Índices Estatísticos | | |
| --- | --- | --- | --- | --- | --- | --- |
| a | b | R^2 | MBE | RMSE | d |
| Rio Branco | 4.01ns | 0.1453* | 0.4723 | **-** | **-** | **-** |
| Macapá | 3.25ns | 0.5623* | 0.5874 | **-** | **-** | **-** |
| Barcelos | 3.14ns | 0.1421* | 0.4521 | **-** | **-** | **-** |
| Eirunepé | 2.31ns | 0.6514ns | 0.3625 | **-** | **-** | **-** |
| Itacoatiara | 5.01ns | 0.8954ns | 0.4121 | **-** | **-** | **-** |
| Lábrea | 2.14ns | 0.6231* | 0.4214 | **-** | **-** | **-** |
| Manaus | 1.25* | 0.4236ns | 0.3874 | **-** | **-** | **-** |
| Parintins | 2.36* | 0.2145ns | 0.4231 | **-** | **-** | **-** |
| S. G. da Cachoeira | 3.65ns | 0.1263* | 0.4031 | **-** | **-** | **-** |
| Sinop | 4.25ns | 0.1021** | 0.5410 | **-** | **-** | **-** |
| Belém | 0.9874ns | 0.6547* | 0.6012 | **-** | **-** | **-** |
| Cametá | 0.7521ns | 1.06ns | 0.4561 | **-** | **-** | **-** |
| Conceição do Araguaia | 2.03ns | 0.6214ns | 0.4123 | **-** | **-** | **-** |
| Itaituba | 3.14ns | 0.3121ns | 0.3124 | **-** | **-** | **-** |
| Marabá | 0.8721ns | 1.65ns | 0.3987 | **-** | **-** | **-** |
| Monte Alegre | 0.9214* | 1.23ns | 0.2378 | **-** | **-** | **-** |
| Óbidos | 2.36ns | 0.2314ns | 0.3214 | **-** | **-** | **-** |
| Soure | 3.14ns | 0.3687ns | 0.4214 | **-** | **-** | **-** |
| Tucuruí | 1.05ns | 0.7845ns | 0.2415 | **-** | **-** | **-** |
| Boa Vista | 1.78ns | 0.2315ns | 0.3674 | **-** | **-** | **-** |

Table 14. Coefficients of the model 7 Group I adjusted for the 20 weather stations (p-value 0.01*, 0.05** and not significantns).

| Weather Station | Coefficients | | | Índices Estatísticos | | |
| --- | --- | --- | --- | --- | --- | --- |
| a | b | R^2 | MBE | RMSE | d |
| Rio Branco | 0.0028ns | 0.2894* | 0.7235 | - | - | - |
| Macapá | -0.0041ns | 0.3002* | 0.8497 | - | - | - |
| Barcelos | 0.0150** | 0.3005* | 0.7221 | 0.036 | 2.80 | 0.9107 |
| Eirunepé | 0.0063ns | 0.2992* | 0.6700 | - | - | - |
| Itacoatiara | -0.0249* | 0.2818* | 0.7723 | 0.040 | 2.48 | 0.9292 |
| Lábrea | 0.0981* | 0.2408* | 0.7069 | 0.059 | 2.12 | 0.8980 |
| Manaus | -0.0170* | 0.2884* | 0.7453 | 0.098 | 2.45 | 0.9306 |
| Parintins | -0.0163* | 0.2905* | 0.8284 | -0.048 | 2.22 | 0.9497 |
| S. G. da Cachoeira | -0.0464* | 0.3068* | 0.7211 | 0.097 | 2.55 | 0.9125 |
| Sinop | 0.1032* | 0.2550* | 0.6148 | 0.092 | 2.73 | 0.8565 |
| Belém | 0.0249* | 0.2237* | 0.6530 | -0.080 | 2.12 | 0.8911 |
| Cametá | 0.0648* | 0.2589* | 0.7986 | 0.010 | 1.76 | 0.9346 |
| Conceição do Araguaia | 0.0361* | 0.2642* | 0.7586 | -0.030 | 2.16 | 0.9289 |
| Itaituba | 0.0417* | 0.2767* | 0.8076 | 0.123 | 2.06 | 0.9457 |
| Marabá | 0.0787* | 0.2464* | 0.7385 | -0.077 | 1.98 | 0.9191 |
| Monte Alegre | 0.0421* | 0.2755* | 0.8525 | 0.027 | 1.55 | 0.9618 |
| Óbidos | 0.0202* | 0.2429* | 0.7632 | -0.094 | 2.14 | 0.9314 |
| Soure | 0.1462* | 0.2184* | 0.7831 | -0.122 | 2.04 | 0.9336 |
| Tucuruí | 0.1047* | 0.2125* | 0.6662 | -0.049 | 2.09 | 0.8801 |
| Boa Vista | 0.0811* | 0.2583* | 0.8109 | 0.053 | 1.93 | 0.9442 |

Table 15. Coefficients of the model 8 Group I adjusted for the 20 weather stations (p-value 0.01*, 0.05** and not significantns).

| Weather Station | Coefficients | | | Índices Estatísticos | | |
| --- | --- | --- | --- | --- | --- | --- |
| a | b | R^2 | MBE | RMSE | d |
| Rio Branco | 0.2966* | 0.9667* | 0.7243 | 0.141 | 2.58 | 0.9073 |
| Macapá | 0.3029* | 0.9771* | 0.8501 | 0.078 | 2.04 | 0.9578 |
| Barcelos | 0.3202* | 0.9362* | 0.7245 | 0.078 | 2.80 | 0.9083 |
| Eirunepé | 0.3094* | 0.9542* | 0.6716 | 0.144 | 2.33 | 0.8972 |
| Itacoatiara | 0.2641* | 1.02* | 0.7706 | 0.074 | 2.49 | 0.9265 |
| Lábrea | 0.3372* | 0.7791* | 0.7157 | 0.073 | 2.10 | 0.8994 |
| Manaus | 0.2773* | 1.01* | 0.7444 | 0.128 | 2.46 | 0.9283 |
| Parintins | 0.2823* | 0.9966* | 0.8276 | 0.004 | 2.23 | 0.9480 |
| S. G. da Cachoeira | 0.2683* | 1.07* | 0.7176 | 0.138 | 2.57 | 0.9082 |
| Sinop | 0.3547* | 0.7908* | 0.6200 | 0.097 | 2.71 | 0.8591 |
| Belém | 0.2479* | 0.9296* | 0.6537 | -0.076 | 2.13 | 0.8904 |
| Cametá | 0.3233* | 0.8521* | 0.8045 | 0.021 | 1.74 | 0.9355 |
| Conceição do Araguaia | 0.3029* | 0.9000* | 0.7634 | -0.008 | 2.13 | 0.9289 |
| Itaituba | 0.3215* | 0.8869* | 0.8133 | 0.146 | 2.04 | 0.9455 |
| Marabá | 0.3243* | 0.8190* | 0.7480 | -0.062 | 1.94 | 0.9209 |
| Monte Alegre | 0.3198* | 0.8935* | 0.8566 | 0.042 | 1.53 | 0.9622 |
| Óbidos | 0.2656* | 0.9307* | 0.7650 | -0.073 | 2.13 | 0.9309 |
| Soure | 0.3605* | 0.7022* | 0.7948 | -0.106 | 1.99 | 0.9366 |
| Tucuruí | 0.3127* | 0.7620* | 0.6724 | -0.046 | 2.06 | 0.8828 |
| Boa Vista | 0.3371* | 0.8274* | 0.8157 | 0.068 | 1.90 | 0.9449 |

Table 16. Coefficients of the model 9 Group I adjusted for the 20 weather stations (p-value 0.01*, 0.05** and not significantns).

| Weather Station | Coefficients | | | Índices Estatísticos | | |
| --- | --- | --- | --- | --- | --- | --- |
| a | b | R^2 | MBE | RMSE | d |
| Rio Branco | 0.5612ns | 0.6514ns | 0.5121 | - | - | - |
| Macapá | 0.7116* | 0.3920* | 0.8246 | -0.124 | 2.07 | 0.9621 |
| Barcelos | 0.6654* | 0.2805* | 0.6365 | -0.642 | 3.20 | 0.9202 |
| Eirunepé | 0.6145* | 0.2547* | 0.4537 | -0.591 | 3.22 | 0.8799 |
| Itacoatiara | 0.6205* | 0.3626* | 0.7012 | -0.461 | 2.79 | 0.9304 |
| Lábrea | 0.6170* | 0.2373* | 0.3436 | -0.282 | 3.05 | 0.8449 |
| Manaus | 0.6373* | 0.3561* | 0.6503 | -0.396 | 2.97 | 0.9188 |
| Parintins | 0.6741* | 0.3958* | 0.8203 | -0.191 | 2.38 | 0.9511 |
| S. G. da Cachoeira | 0.6153* | 0.3466* | 0.6478 | -0.460 | 2.95 | 0.9112 |
| Sinop | 0.6766* | 0.2770* | 0.3591 | -0.334 | 3.19 | 0.8622 |
| Belém | 0.5397* | 0.3649* | 0.5500 | -0.254 | 2.49 | 0.8658 |
| Cametá | 0.6833* | 0.3761* | 0.7751 | -0.072 | 1.77 | 0.9416 |
| Conceição do Araguaia | 0.6685* | 0.3695* | 0.7277 | -0.362 | 2.48 | 0.9270 |
| Itaituba | 0.6812* | 0.3329* | 0.7539 | -0.347 | 2.16 | 0.9552 |
| Marabá | 0.6458* | 0.3036* | 0.5985 | -0.455 | 2.60 | 0.9011 |
| Monte Alegre | 0.7024* | 0.3874* | 0.8331 | -0.169 | 1.78 | 0.9582 |
| Óbidos | 0.5950* | 0.3715* | 0.6681 | -0.395 | 2.67 | 0.9151 |
| Soure | 0.6598* | 0.2392* | 0.5762 | -0.555 | 2.72 | 0.9158 |
| Tucuruí | 0.5884* | 0.2924* | 0.5385 | -0.276 | 2.37 | 0.8755 |
| Boa Vista | 0.6813* | 0.3336* | 0.7563 | -0.127 | 2.21 | 0.9375 |

Table 17. Coefficients of the model 10 Group I adjusted for the 20 weather stations (p-value 0.01*, 0.05** and not significantns).

| Weather Station | Coefficients | | | | Índices Estatísticos | | |
| --- | --- | --- | --- | --- | --- | --- | --- |
| a | b | c | R^2 | MBE | RMSE | d |
| Rio Branco | 0.2122* | 0.4784* | 0.7003* | 0.772 | 0.082 | 2.32 | 0.9307 |
| Macapá | 0.1995* | 0.5380* | 0.7178* | 0.8958 | 0.072 | 1.69 | 0.9722 |
| Barcelos | 0.2142* | 0.4846* | 0.5639* | 0.8045 | 0.042 | 2.26 | 0.9470 |
| Eirunepé | 0.2233* | 0.4343* | 0.5737* | 0.758 | 0.115 | 2.00 | 0.9339 |
| Itacoatiara | 0.1817* | 0.4678* | 0.6911* | 0.8221 | 0.025 | 2.16 | 0.9489 |
| Lábrea | 0.2769* | 0.3842* | 0.6852* | 0.7606 | 0.114 | 2.01 | 0.9105 |
| Manaus | 0.2041* | 0.4737* | 0.7516* | 0.7846 | 0.079 | 2.25 | 0.9430 |
| Parintins | 0.1672* | 0.5270* | 0.6562* | 0.8933 | 0.062 | 1.91 | 0.9643 |
| S. G. da Cachoeira | 0.1825* | 0.4718* | 0.6701* | 0.7713 | 0.040 | 2.29 | 0.9335 |
| Sinop | 0.3103* | 0.4191* | 0.8520* | 0.6359 | 0.074 | 2.58 | 0.8793 |
| Belém | 0.2171* | 0.3681* | 0.9748* | 0.6563 | -0.092 | 2.16 | 0.8882 |
| Cametá | 0.2159* | 0.4893* | 0.7101* | 0.8452 | 0.021 | 1.54 | 0.9509 |
| Conceição do Araguaia | 0.1970* | 0.4940* | 0.6848* | 0.8221 | -0.090 | 1.90 | 0.9491 |
| Itaituba | 0.2113* | 0.4940* | 0.6286* | 0.887 | 0.057 | 1.48 | 0.9743 |
| Marabá | 0.2355* | 0.4382* | 0.6629* | 0.8081 | -0.090 | 1.74 | 0.9419 |
| Monte Alegre | 0.2055* | 0.5173* | 0.6947* | 0.9029 | 0.009 | 1.26 | 0.9760 |
| Óbidos | 0.1968* | 0.4229* | 0.7587* | 0.794 | -0.053 | 2.00 | 0.9415 |
| Soure | 0.2780* | 0.4029* | 0.6001* | 0.8422 | -0.103 | 1.72 | 0.9545 |
| Tucuruí | 0.2549* | 0.3692* | 0.7780* | 0.6905 | -0.071 | 1.96 | 0.8979 |
| Boa Vista | 0.2453* | 0.4656* | 0.7138* | 0.8429 | 0.054 | 1.77 | 0.9546 |

Table 18. Coefficients of the model 11 Group I adjusted for the 20 weather stations (p-value 0.01*, 0.05** and not significantns).

| Weather Station | Coefficients | | Índices Estatísticos | | |
| --- | --- | --- | --- | --- | --- |
| a | R^2 | MBE | RMSE | d |
| Rio Branco | 0.2536ns | 0.2345 | - | - | - |
| Macapá | 0.1436ns | 0.3214 | - | - | - |
| Barcelos | 0.7426ns | 0.1968 | - | - | - |
| Eirunepé | 1.21ns | 0.2364 | - | - | - |
| Itacoatiara | 0.3214ns | 0.3321 | - | - | - |
| Lábrea | 0.5618ns | 0.1574 | - | - | - |
| Manaus | 0.6941ns | 0.2114 | - | - | - |
| Parintins | 0.7123ns | 0.2564 | - | - | - |
| S. G. da Cachoeira | 0.6123ns | 0.2432 | - | - | - |
| Sinop | 0.3214ns | 0.3214 | - | - | - |
| Belém | 0.2131ns | 0.2131 | - | - | - |
| Cametá | 0.1421ns | 0.1987 | - | - | - |
| Conceição do Araguaia | 0.7418ns | 0.4231 | - | - | - |
| Itaituba | 0.8512ns | 0.3547 | - | - | - |
| Marabá | 0.3621ns | 0.2147 | - | - | - |
| Monte Alegre | 0.1432ns | 0.3614 | - | - | - |
| Óbidos | 0.4562ns | 0.2561 | - | - | - |
| Soure | 0.9812ns | 0.2132 | - | - | - |
| Tucuruí | 1.05ns | 0.3214 | - | - | - |
| Boa Vista | 1.12ns | 0.2341 | - | - | - |

Table 19. Coefficients of the model 12 Group I adjusted for the 20 weather stations (p-value 0.01*, 0.05** and not significantns).

| Weather Station | Coefficients | | | | Índices Estatísticos | | |
| --- | --- | --- | --- | --- | --- | --- | --- |
| a | b | c | R^2 | MBE | RMSE | d |
| Rio Branco | 0.5069* | -0.2689* | 0.8911* | 0.7667 | 0.061 | 2.36 | 0.9279 |
| Macapá | 0.5180* | -0.2948* | 0.9963* | 0.8948 | 0.054 | 1.70 | 0.9720 |
| Barcelos | 0.7355* | -0.4804* | 1.21* | 0.7916 | 0.074 | 2.33 | 0.9423 |
| Eirunepé | 0.7912* | -0.5353* | 1.23* | 0.7446 | 0.140 | 2.01 | 0.9317 |
| Itacoatiara | 0.5107* | -0.3080* | 0.9453* | 0.8186 | 0.032 | 2.17 | 0.9477 |
| Lábrea | 0.5876* | -0.2934* | 0.8339* | 0.7568 | 0.093 | 2.02 | 0.9106 |
| Manaus | 0.4452* | -0.2229* | 0.8198* | 0.7818 | 0.081 | 2.27 | 0.9418 |
| Parintins | 0.5242* | -0.3236* | 1.02* | 0.8871 | 0.046 | 1.95 | 0.9632 |
| S. G. da Cachoeira | 0.5868* | -0.3798* | 1.04* | 0.7663 | 0.040 | 2.29 | 0.9327 |
| Sinop | 0.4116* | -0.0896* | 0.5566* | 0.6344 | 0.075 | 2.59 | 0.8773 |
| Belém | 0.1544* | 0.0746* | 0.2456* | 0.6574 | -0.088 | 2.14 | 0.8902 |
| Cametá | 0.4815* | -0.2370* | 0.8493* | 0.8433 | 0.016 | 1.55 | 0.9502 |
| Conceição do Araguaia | 0.4750* | -0.2461* | 0.8712* | 0.8165 | -0.104 | 1.91 | 0.9483 |
| Itaituba | 0.6550* | -0.4139* | 1.13* | 0.8846 | 0.067 | 1.51 | 0.9731 |
| Marabá | 0.5196* | -0.2544* | 0.8270* | 0.7999 | -0.085 | 1.77 | 0.9395 |
| Monte Alegre | 0.5172* | -0.2818* | 0.9485* | 0.9007 | 0.013 | 1.27 | 0.9754 |
| Óbidos | 0.3637* | -0.1477* | 0.6506* | 0.7902 | -0.046 | 2.01 | 0.9412 |
| Soure | 0.5568* | -0.2428* | 0.7716* | 0.8306 | -0.111 | 1.82 | 0.9488 |
| Tucuruí | 0.3604* | -0.0828* | 0.4894* | 0.6872 | -0.066 | 1.98 | 0.8956 |
| Boa Vista | 0.4657* | -0.1870* | 0.7422* | 0.8388 | 0.055 | 1.80 | 0.9531 |

Table 20. Coefficients of the model 13 Group I adjusted for the 20 weather stations (p-value 0.01*, 0.05** and not significantns).

| Weather Station | Coefficients | | | | Índices Estatísticos | | |
| --- | --- | --- | --- | --- | --- | --- | --- |
| a | b | c | R^2 | MBE | RMSE | d |
| Rio Branco | 0.4955* | -8.75* | 1.43* | 0.7534 | 0.075 | 2.46 | 0.9214 |
| Macapá | 0.3219* | -2.44ns | 1.54* | 0.8831 | - | - | - |
| Barcelos | 0.5365* | -8.97* | 1.44* | 0.7645 | 0.041 | 2.54 | 0.9293 |
| Eirunepé | 0.4165* | -4.84* | 1.36* | 0.7102 | 0.136 | 2.16 | 0.9177 |
| Itacoatiara | 0.4858* | -9.40* | 1.39* | 0.8029 | 0.036 | 2.29 | 0.9414 |
| Lábrea | 0.5976* | -10.47* | 1.20* | 0.7413 | 0.041 | 2.03 | 0.9133 |
| Manaus | 0.2898* | -1.68* | 1.39* | 0.7755 | 0.102 | 2.29 | 0.9396 |
| Parintins | 0.6619* | -15.51* | 1.50* | 0.8691 | -0.036 | 1.99 | 0.9615 |
| S. G. da Cachoeira | 0.4704* | -8.56* | 1.44* | 0.7522 | 0.070 | 2.39 | 0.9257 |
| Sinop | 0.5104* | -6.79* | 1.26* | 0.6268 | 0.079 | 2.64 | 0.8703 |
| Belém | 0.2564* | -1.23ns | 1.09* | 0.6614 | - | - | - |
| Cametá | 0.5205* | -8.81* | 1.36* | 0.8311 | 0.019 | 1.63 | 0.9449 |
| Conceição do Araguaia | 0.5732* | -11.89* | 1.43* | 0.8021 | -0.085 | 1.98 | 0.9438 |
| Itaituba | 0.5282* | -9.02* | 1.40* | 0.8551 | 0.113 | 1.76 | 0.9620 |
| Marabá | 0.4740* | -6.66* | 1.24* | 0.7785 | -0.075 | 1.83 | 0.9332 |
| Monte Alegre | 0.4815* | -7.61* | 1.44* | 0.8883 | 0.029 | 1.35 | 0.9718 |
| Óbidos | 0.4279* | -7.17* | 1.24* | 0.7854 | -0.071 | 2.02 | 0.9402 |
| Soure | 0.4651* | -4.61* | 1.11* | 0.8169 | -0.111 | 1.90 | 0.9435 |
| Tucuruí | 0.6558* | -13.68* | 1.12* | 0.6921 | -0.076 | 1.98 | 0.8985 |
| Boa Vista | 0.3736* | -2.63* | 1.32* | 0.8388 | 0.062 | 1.78 | 0.9530 |

**GROUP II**

Table 21. Coefficients of the model 14 Group II adjusted for the 20 weather stations (p-value 0.01*, 0.05** and not significantns).

| Weather Station | Coefficients | | Statistical indices | | |
| --- | --- | --- | --- | --- | --- |
| a | R^2 | MBE | RMSE | d |
| Rio Branco | 0.1565* | 0.5087 | 0.167 | 3.30 | 0.7913 |
| Macapá | 0.2002* | 0.4609 | 0.252 | 3.90 | 0.7185 |
| Barcelos | 0.1603* | 0.5100 | 0.313 | 3.73 | 0.7730 |
| Eirunepé | 0.1439* | 0.5297 | 0.197 | 2.91 | 0.7873 |
| Itacoatiara | 0.1668* | 0.4802 | 0.236 | 3.75 | 0.7354 |
| Lábrea | 0.1530* | 0.4864 | 0.189 | 2.88 | 0.7388 |
| Manaus | 0.1638* | 0.3496 | 0.260 | 4.09 | 0.6606 |
| Parintins | 0.1883* | 0.4494 | 0.467 | 4.03 | 0.7111 |
| S. G. da Cachoeira | 0.1519* | 0.6692 | 0.366 | 2.91 | 0.8429 |
| Sinop | 0.1562* | 0.3545 | 0.067 | 3.44 | 0.7401 |
| Belém | 0.1395* | 0.2432 | 0.019 | 3.19 | 0.5638 |
| Cametá | 0.1959* | 0.2557 | -0.148 | 3.25 | 0.5913 |
| Conceição do Araguaia | 0.1548* | 0.4956 | 0.167 | 3.21 | 0.7805 |
| Itaituba | 0.1782* | 0.5053 | 0.156 | 3.46 | 0.7566 |
| Marabá | 0.1648* | 0.4818 | 0.034 | 2.81 | 0.7557 |
| Monte Alegre | 0.2064* | 0.3715 | -0.036 | 3.36 | 0.6910 |
| Óbidos | 0.1450* | 0.4922 | 0.153 | 3.12 | 0.7783 |
| Soure | 0.7523ns | 0.1974 | - | - | - |
| Tucuruí | 0.1655* | 0.2713 | -0.166 | 2.94 | 0.6790 |
| Boa Vista | 0.1734* | 0.5305 | 0.241 | 3.01 | 0.7976 |

Table 22. Coefficients of the model 15 Group II adjusted for the 20 weather stations (p-value 0.01*, 0.05** and not significantns).

| Weather Station | Coefficients | | | | Statistical indices | | |
| --- | --- | --- | --- | --- | --- | --- | --- |
| a | b | c | R^2 | MBE | RMSE | d |
| Rio Branco | 0.6234* | 0.0231* | 1.88* | 0.6231 | -0.117 | 2.86 | 0.8911 |
| Macapá | 0.2145* | 0.0782ns | 2.78ns | 0.4121 | - | - | - |
| Barcelos | 0.6335* | 0.0144* | 2.11* | 0.6514 | -0.049 | 3.16 | 0.8948 |
| Eirunepé | 0.6246* | 0.0295* | 1.67* | 0.6517 | -0.065 | 2.50 | 0.8938 |
| Itacoatiara | 0.6143* | 0.0257* | 1.99* | 0.6143 | 0.025 | 3.22 | 0.8709 |
| Lábrea | 0.1987ns | 0.1214ns | 3.21* | 0.3278 | - | - | - |
| Manaus | 0.5828* | 0.0109* | 2.43* | 0.4878 | 0.060 | 3.69 | 0.8198 |
| Parintins | 0.6337* | 0.0170* | 2.35* | 0.5983 | 0.313 | 3.46 | 0.8575 |
| S. G. da Cachoeira | 0.8769* | 0.0500* | 1.23* | 0.7836 | -0.050 | 2.40 | 0.9267 |
| Sinop | 0.6282* | 0.0239* | 1.86* | 0.4686 | -0.051 | 3.06 | 0.8347 |
| Belém | 0.5274* | 0.0109* | 2.27* | 0.3417 | -0.063 | 2.97 | 0.7317 |
| Cametá | 0.1426ns | 0.0987* | 1.06ns | 0.2314 | - | - | - |
| Conceição do Araguaia | 0.6608* | 0.0280* | 1.69* | 0.5899 | 0.014 | 2.88 | 0.8627 |
| Itaituba | 0.6389* | 0.0138* | 2.28* | 0.6464 | -0.057 | 2.80 | 0.8943 |
| Marabá | 0.1748* | 0.2141ns | 1.36ns | 0.3121 | - | - | - |
| Monte Alegre | 0.2110* | 0.1547ns | 3.36ns | 0.2141 | - | - | - |
| Óbidos | 0.5576* | 0.0058* | 2.52* | 0.6271 | 0.002 | 2.73 | 0.8851 |
| Soure | 0.1001* | 0.0162ns | 1.21ns | 0.3105 | - | - | - |
| Tucuruí | 0.6245* | 0.0921* | 1.31* | 0.2882 | -0.214 | 2.89 | 0.7278 |
| Boa Vista | 0.6723* | 0.0182* | 1.99* | 0.6167 | 0.045 | 2.76 | 0.8794 |

Table 23. Coefficients of the model 16 Group II adjusted for the 20 weather stations (p-value 0.01*, 0.05** and not significantns).

| Weather Station | Coefficients | | | Statistical indices | | |
| --- | --- | --- | --- | --- | --- | --- |
| a | b | R^2 | MBE | RMSE | d |
| Rio Branco | -0.2429* | 0.2344* | 0.5853 | -0.071 | 2.96 | 0.8748 |
| Macapá | -0.5896* | 0.4105* | 0.6363 | 0.039 | 3.23 | 0.8824 |
| Barcelos | -0.3095* | 0.2607* | 0.6006 | 0.012 | 3.38 | 0.8689 |
| Eirunepé | -0.2898* | 0.2382* | 0.6398 | -0.047 | 2.52 | 0.8891 |
| Itacoatiara | -0.3457* | 0.2917* | 0.5942 | 0.008 | 3.29 | 0.8601 |
| Lábrea | -0.1561* | 0.2020* | 0.5219 | 0.163 | 2.85 | 0.7852 |
| Manaus | -0.3861* | 0.2995* | 0.4529 | 0.085 | 3.76 | 0.8026 |
| Parintins | -0.4021* | 0.3386* | 0.5647 | 0.292 | 3.67 | 0.8363 |
| S. G. da Cachoeira | -0.2731* | 0.2456* | 0.7807 | -0.036 | 2.42 | 0.9246 |
| Sinop | -0.0096ns | 0.1590* | 0.3547 | - | - | - |
| Belém | -0.3560* | 0.2571* | 0.3289 | -0.052 | 3.00 | 0.7227 |
| Cametá | -0.2238* | 0.2737* | 0.2819 | -0.208 | 3.21 | 0.6656 |
| Conceição do Araguaia | -0.1304* | 0.1925* | 0.5258 | 0.067 | 3.10 | 0.8286 |
| Itaituba | -0.3148* | 0.2837* | 0.5981 | 0.000 | 3.07 | 0.8628 |
| Marabá | -0.2012* | 0.2289* | 0.5427 | -0.047 | 2.67 | 0.8301 |
| Monte Alegre | -0.2692* | 0.3029* | 0.4179 | -0.126 | 3.26 | 0.7724 |
| Óbidos | -0.2974* | 0.2368* | 0.5794 | 0.012 | 2.84 | 0.8684 |
| Soure | -0.1204* | 0.0921ns | 0.1821 | - | - | - |
| Tucuruí | -0.1042* | 0.2019* | 0.2824 | -0.206 | 2.92 | 0.7191 |
| Boa Vista | -0.3127* | 0.2722* | 0.5961 | 0.062 | 2.80 | 0.8688 |

Table 24. Coefficients of the model 17 Group II adjusted for the 20 weather stations (p-value 0.01*, 0.05** and not significantns).

| Weather Station | Coefficients | | | | Statistical indices | | |
| --- | --- | --- | --- | --- | --- | --- | --- |
| a | b | c | R^2 | MBE | RMSE | d |
| Rio Branco | -0.0612* | -12.24ns | 1.23* | 0.2674 | -0.085 | 4.11 | 0.6427 |
| Macapá | -0.0939ns | -69.94ns | 3.38* | 0.6155 | - | - | - |
| Barcelos | -0.0855ns | -59.03* | 3.01* | 0.5114 | - | - | - |
| Eirunepé | -0.2029* | -16.98* | 1.54* | 0.28 | -0.103 | 3.82 | 0.5959 |
| Itacoatiara | 0.0044ns | -51.73* | 2.48ns | 0.4917 | - | - | - |
| Lábrea | 0.0080ns | -27.63* | 1.66ns | 0.3149 | - | - | - |
| Manaus | -0.1494* | -33.89* | 2.01* | 0.4302 | -0.056 | 3.71 | 0.7835 |
| Parintins | -0.0994ns | -60.86* | 3.01ns | 0.6302 | - | - | - |
| S. G. da Cachoeira | 0.4180* | -33.07* | 1.25* | 0.1818 | -0.221 | 4.30 | 0.5539 |
| Sinop | 0.0028ns | -11.99* | 1.22ns | 0.2363 | - | - | - |
| Belém | -0.2164* | -21.76* | 1.63* | 0.2692 | 0.045 | 3.10 | 0.6415 |
| Cametá | 0.1570* | -45.45* | 2.16* | 0.4236 | 0.059 | 2.94 | 0.7428 |
| Conceição do Araguaia | -0.1997* | -8.52* | 1.28* | 0.2451 | -0.108 | 3.75 | 0.6499 |
| Itaituba | -0.0258ns | -39.92ns | 2.16* | 0.4594 | - | - | - |
| Marabá | -0.2398* | -22.24* | 1.84* | 0.3238 | 0.017 | 3.26 | 0.6612 |
| Monte Alegre | -0.0801ns | -37.96* | 2.23ns | 0.467 | - | - | - |
| Óbidos | -0.0023ns | -44.43* | 2.27ns | 0.545 | - | - | - |
| Soure | 0.1398* | -69.22* | 3.03* | 0.5365 | 0.037 | 2.89 | 0.8331 |
| Tucuruí | 0.1412* | -34.57* | 1.73* | 0.3319 | 0.099 | 2.87 | 0.6944 |
| Boa Vista | -0.2251* | -32.11* | 2.14* | 0.5174 | -0.141 | 3.05 | 0.8195 |

Table 25. Coefficients of the model 18 Group II adjusted for the 20 weather stations (p-value 0.01*, 0.05** and not significantns).

| Weather Station | Coefficients | | | | Statistical indices | | |
| --- | --- | --- | --- | --- | --- | --- | --- |
| a | b | c | R^2 | MBE | RMSE | d |
| Rio Branco | 0.6190* | 0.9249* | 1.86* | 0.6351 | -0.065 | 2.83 | 0.8902 |
| Macapá | 0.7203* | 0.3776* | 2.43* | 0.6612 | 0.047 | 3.08 | 0.8940 |
| Barcelos | 0.6422* | 0.5481* | 2.06* | 0.6634 | -0.033 | 3.11 | 0.8975 |
| Eirunepé | 0.6173* | 1.11* | 1.67* | 0.664 | -0.031 | 2.46 | 0.8949 |
| Itacoatiara | 0.6413* | 1.10* | 1.85* | 0.6348 | 0.059 | 3.13 | 0.8766 |
| Lábrea | 0.5830* | 0.8291* | 1.94* | 0.5782 | 0.233 | 2.67 | 0.8087 |
| Manaus | 0.6125* | 0.5728* | 2.18* | 0.5124 | 0.103 | 3.60 | 0.8251 |
| Parintins | 0.6429* | 0.6724* | 2.28* | 0.6141 | 0.334 | 3.43 | 0.8590 |
| S. G. da Cachoeira | 0.9486* | 1.68* | 1.21* | 0.7908 | -0.043 | 2.37 | 0.9283 |
| Sinop | 0.6286* | 1.19* | 1.74* | 0.472 | -0.012 | 3.06 | 0.8264 |
| Belém | 60.48ns | 0.0304ns | 0.9541* | 0.3898 | - | - | - |
| Cametá | 0.6138* | 0.2630* | 2.82* | 0.359 | -0.160 | 3.07 | 0.7078 |
| Conceição do Araguaia | 0.6608* | 1.28* | 1.60* | 0.6047 | 0.059 | 2.82 | 0.8635 |
| Itaituba | 0.6460* | 0.6099* | 2.17* | 0.6559 | -0.035 | 2.75 | 0.8963 |
| Marabá | 0.6440* | 0.9539* | 1.84* | 0.6319 | -0.014 | 2.41 | 0.8670 |
| Monte Alegre | 0.6688* | 0.7405* | 2.27* | 0.5088 | -0.081 | 3.03 | 0.8111 |
| Óbidos | 0.5657* | 0.2664* | 2.39* | 0.6388 | 0.033 | 2.68 | 0.8869 |
| Soure | 0.3641ns | 0.9841* | 1.52ns | 0.3521 | - | - | - |
| Tucuruí | 3.95ns | 1.14ns | 0.6655* | 0.3542 | - | - | - |
| Boa Vista | 0.7095* | 0.7257* | 1.88* | 0.6435 | 0.068 | 2.66 | 0.8855 |

Table 26. Coefficients of the model 19 Group II adjusted for the 20 weather stations (p-value 0.01*, 0.05** and not significantns).

| Weather Station | Coefficients | | | Statistical indices | | |
| --- | --- | --- | --- | --- | --- | --- |
| a | b | R^2 | MBE | RMSE | d |
| Rio Branco | 0.0576* | 1.08* | 0.5922 | -0.033 | 2.94 | 0.8759 |
| Macapá | 0.0259* | 1.67* | 0.6423 | 0.077 | 3.18 | 0.8851 |
| Barcelos | 0.0444* | 1.21* | 0.6132 | 0.073 | 3.33 | 0.8733 |
| Eirunepé | 0.0443* | 1.14* | 0.6401 | -0.025 | 2.52 | 0.8882 |
| Itacoatiara | 0.0492* | 1.24* | 0.5959 | 0.042 | 3.29 | 0.8591 |
| Lábrea | 0.0763* | 0.9394* | 0.5325 | 0.188 | 2.82 | 0.7899 |
| Manaus | 0.0410* | 1.30* | 0.4551 | 0.131 | 3.76 | 0.8005 |
| Parintins | 0.0513* | 1.33* | 0.5673 | 0.333 | 3.64 | 0.8369 |
| S. G. da Cachoeira | 0.0482* | 1.16* | 0.7834 | -0.046 | 2.40 | 0.9263 |
| Sinop | 0.1161* | 0.7726* | 0.3848 | 0.083 | 3.34 | 0.7642 |
| Belém | 0.0336* | 1.25* | 0.3284 | -0.044 | 3.00 | 0.7210 |
| Cametá | 0.0867* | 1.07* | 0.2916 | -0.183 | 3.20 | 0.6679 |
| Conceição do Araguaia | 0.0770* | 0.9326* | 0.5458 | 0.107 | 3.03 | 0.8361 |
| Itaituba | 0.0554* | 1.20* | 0.6057 | 0.038 | 3.03 | 0.8652 |
| Marabá | 0.0694* | 1.03* | 0.5587 | -0.009 | 2.62 | 0.8356 |
| Monte Alegre | 0.0812* | 1.15* | 0.4298 | -0.095 | 3.23 | 0.7767 |
| Óbidos | 0.0442* | 1.13* | 0.5798 | 0.049 | 2.84 | 0.8661 |
| Soure | 0.0121* | 0.6012ns | 0.2141 | - | - | - |
| Tucuruí | 0.1083* | 0.8477* | 0.2843 | -0.203 | 2.92 | 0.7201 |
| Boa Vista | 0.0500* | 1.20* | 0.6011 | 0.081 | 2.79 | 0.8702 |

Table 27. Coefficients of the model 20 Group II adjusted for the 20 weather stations (p-value 0.01*, 0.05** and not significantns).

| Weather Station | Coefficients | | Statistical indices | | |
| --- | --- | --- | --- | --- | --- |
| a | R^2 | MBE | RMSE | d |
| Rio Branco | 0.4421* | 0.5214 | 0.069 | 3.21 | 0.8907 |
| Macapá | 0.8307* | 0.6544 | 0.045 | 3.11 | 0.8817 |
| Barcelos | 0.4546* | 0.6337 | 0.036 | 3.27 | 0.8994 |
| Eirunepé | 0.3736* | 0.5583 | -0.121 | 2.83 | 0.8957 |
| Itacoatiara | 0.6083* | 0.5959 | 0.047 | 3.25 | 0.8879 |
| Lábrea | 0.4020* | 0.3152 | 0.565 | 3.36 | 0.8007 |
| Manaus | 0.5490* | 0.4895 | 0.157 | 3.68 | 0.8362 |
| Parintins | 0.8230* | 0.5982 | 0.405 | 3.52 | 0.8620 |
| S. G. da Cachoeira | 0.4504* | 0.7111 | -0.397 | 2.73 | 0.9273 |
| Sinop | 0.4271* | 0.1394 | 0.820 | 3.83 | 0.8157 |
| Belém | 0.3570* | 0.3440 | -0.065 | 2.95 | 0.7764 |
| Cametá | 0.7654* | 0.2985 | -0.070 | 3.21 | 0.7229 |
| Conceição do Araguaia | 0.3855* | 0.4458 | 0.483 | 3.30 | 0.8688 |
| Itaituba | 0.6040* | 0.6153 | 0.135 | 2.89 | 0.8991 |
| Marabá | 0.4846* | 0.5048 | 0.271 | 2.77 | 0.8691 |
| Monte Alegre | 0.9240* | 0.4900 | 0.002 | 3.07 | 0.8234 |
| Óbidos | 0.3383* | 0.5519 | 0.119 | 2.98 | 0.8866 |
| Soure | 0.1012ns | 0.1897 | - | - | - |
| Tucuruí | 0.0921ns | 0.1598 | - | - | - |
| Boa Vista | 0.4955* | 0.6325 | 0.085 | 2.73 | 0.8914 |

Table 28. Coefficients of the model 21 Group II adjusted for the 20 weather stations (p-value 0.01*, 0.05** and not significantns).

| Weather Station | Coefficients | | | Statistical indices | | |
| --- | --- | --- | --- | --- | --- | --- |
| a | b | R^2 | MBE | RMSE | d |
| Rio Branco | -0.2599* | 0.3319* | 0.5947 | -0.077 | 2.93 | 0.8794 |
| Macapá | -0.4918* | 0.5132* | 0.6300 | 0.024 | 3.32 | 0.8758 |
| Barcelos | -0.3289* | 0.3686* | 0.6151 | -0.020 | 3.31 | 0.8775 |
| Eirunepé | -0.3017* | 0.3338* | 0.6405 | -0.049 | 2.55 | 0.8878 |
| Itacoatiara | -0.2876* | 0.3712* | 0.5973 | 0.015 | 3.29 | 0.8616 |
| Lábrea | -0.2320* | 0.3128* | 0.5462 | 0.189 | 2.78 | 0.7969 |
| Manaus | -0.3562* | 0.3957* | 0.4617 | 0.069 | 3.74 | 0.8071 |
| Parintins | -0.3133* | 0.4186* | 0.5749 | 0.311 | 3.60 | 0.8414 |
| S. G. da Cachoeira | -0.1941* | 0.3008* | 0.7556 | 0.001 | 2.61 | 0.9114 |
| Sinop | -0.1129* | 0.2662* | 0.3938 | 0.038 | 3.29 | 0.7786 |
| Belém | -0.3619* | 0.3551* | 0.3277 | -0.054 | 3.01 | 0.7177 |
| Cametá | -0.2409* | 0.3817* | 0.3031 | -0.202 | 3.18 | 0.6808 |
| Conceição do Araguaia | -0.2266* | 0.3104* | 0.5596 | 0.071 | 2.99 | 0.8438 |
| Itaituba | -0.3079* | 0.3867* | 0.6124 | -0.009 | 2.99 | 0.8709 |
| Marabá | -0.2697* | 0.3468* | 0.5756 | -0.036 | 2.58 | 0.8449 |
| Monte Alegre | -0.2478* | 0.4031* | 0.4375 | -0.120 | 3.22 | 0.7809 |
| Óbidos | -0.3694* | 0.3593* | 0.5957 | 0.015 | 2.79 | 0.8739 |
| Soure | -0.1012* | 0.1205ns | 0.1874 | - | - | - |
| Tucuruí | -0.1102* | 0.2789* | 0.2878 | -0.213 | 2.90 | 0.7259 |
| Boa Vista | -0.3718* | 0.4012* | 0.6031 | 0.056 | 2.78 | 0.8724 |

Table 29. Coefficients of the model 22 Group II adjusted for the 20 weather stations (p-value 0.01*, 0.05** and not significantns).

| Weather Station | Coefficients | | Statistical indices | | |
| --- | --- | --- | --- | --- | --- |
| a | R^2 | MBE | RMSE | d |
| Rio Branco | 0.3070* | 0.5185 | -0.012 | 3.18 | 0.8857 |
| Macapá | 0.6324* | 0.6007 | 0.038 | 3.40 | 0.8530 |
| Barcelos | 0.3325* | 0.5953 | 0.032 | 3.44 | 0.8851 |
| Eirunepé | 0.2663* | 0.5458 | -0.121 | 2.84 | 0.8919 |
| Itacoatiara | 0.4587* | 0.5485 | 0.026 | 3.44 | 0.8700 |
| Lábrea | 0.2943* | 0.3470 | 0.455 | 3.32 | 0.7987 |
| Manaus | 0.4236* | 0.4071 | 0.151 | 3.97 | 0.8020 |
| Parintins | 0.6215* | 0.5273 | 0.401 | 3.80 | 0.8340 |
| S. G. da Cachoeira | 0.3292* | 0.6917 | -0.378 | 2.83 | 0.9209 |
| Sinop | 0.2780* | 0.2287 | 0.536 | 3.67 | 0.8189 |
| Belém | 0.2699* | 0.2553 | -0.075 | 3.15 | 0.7407 |
| Cametá | 0.5896* | 0.1796 | -0.082 | 3.47 | 0.6755 |
| Conceição do Araguaia | 0.2775* | 0.4366 | 0.337 | 3.37 | 0.8561 |
| Itaituba | 0.4573* | 0.5797 | 0.091 | 3.06 | 0.8807 |
| Marabá | 0.3523* | 0.4858 | 0.166 | 2.82 | 0.8582 |
| Monte Alegre | 0.7010* | 0.3858 | -0.007 | 3.36 | 0.7842 |
| Óbidos | 0.2498* | 0.5294 | 0.084 | 3.07 | 0.8743 |
| Soure | 0.1232ns | 0.1722 | - | - | - |
| Tucuruí | 0.9871ns | 0.2111 | - | - | - |
| Boa Vista | 0.3831* | 0.5659 | 0.100 | 2.95 | 0.8706 |

Table 30. Coefficients of the model 23 Group II adjusted for the 20 weather stations (p-value 0.01*, 0.05** and not significantns).

| Weather Station | Coefficients | | | Statistical indices | | |
| --- | --- | --- | --- | --- | --- | --- |
| a | b | R^2 | MBE | RMSE | d |
| Rio Branco | 12.11 | 0.5621ns | 0.2114 | - | - | - |
| Macapá | 8.74 | 0.6214ns | 0.2561 | - | - | - |
| Barcelos | 10.09 | 0.4114ns | 0.1987 | - | - | - |
| Eirunepé | 9.05ns | 0.3214* | 0.3214 | - | - | - |
| Itacoatiara | 11.35ns | 0.3178* | 0.2654 | - | - | - |
| Lábrea | 9.32ns | 0.5647* | 0.1562 | - | - | - |
| Manaus | 8.12ns | 0.6528* | 0.1874 | - | - | - |
| Parintins | 7.89* | 0.7425ns | 0.2314 | - | - | - |
| S. G. da Cachoeira | 6.89* | 0.6532ns | 0.2014 | - | - | - |
| Sinop | 10.21* | 0.4512ns | 0.1874 | - | - | - |
| Belém | 9.45* | 0.3689ns | 0.3214 | - | - | - |
| Cametá | 12.32ns | 0.6548* | 0.2687 | - | - | - |
| Conceição do Araguaia | 10.05ns | 0.4321* | 0.2347 | - | - | - |
| Itaituba | 8.89* | 0.3698ns | 0.3647 | - | - | - |
| Marabá | 9.21* | 0.6987ns | 0.2147 | - | - | - |
| Monte Alegre | 7.89* | 0.7854ns | 0.1896 | - | - | - |
| Óbidos | 12.14* | 0.8547ns | 0.2314 | - | - | - |
| Soure | 9.21* | 0.7123ns | 0.2214 | - | - | - |
| Tucuruí | 8.89* | 0.5641ns | 0.3897 | - | - | - |
| Boa Vista | 10.65* | 0.4112ns | 0.1562 | - | - | - |

Table 31. Coefficients of the model 24 Group II adjusted for the 20 weather stations (p-value 0.01*, 0.05** and not significantns).

| Weather Station | Coefficients | | | Statistical indices | | |
| --- | --- | --- | --- | --- | --- | --- |
| a | b | R^2 | MBE | RMSE | d |
| Rio Branco | -0.5726* | 0.0333* | 0.3915 | -0.153 | 3.75 | 0.7881 |
| Macapá | -1.81* | 0.0744* | 0.7087 | 0.105 | 2.79 | 0.9169 |
| Barcelos | -1.06* | 0.0479* | 0.5853 | 0.024 | 3.29 | 0.8728 |
| Eirunepé | -0.7644* | 0.0377* | 0.5025 | -0.055 | 3.08 | 0.8182 |
| Itacoatiara | -1.14* | 0.0503* | 0.6424 | -0.003 | 3.18 | 0.8774 |
| Lábrea | -0.7527* | 0.0376* | 0.4677 | 0.120 | 2.95 | 0.7866 |
| Manaus | -1.02* | 0.0456* | 0.482 | 0.008 | 3.53 | 0.8312 |
| Parintins | -1.35* | 0.0589* | 0.6703 | 0.208 | 3.17 | 0.8897 |
| S. G. da Cachoeira | -1.07* | 0.0476* | 0.6835 | -0.085 | 2.67 | 0.9047 |
| Sinop | -0.3817* | 0.0282* | 0.2306 | -0.071 | 3.72 | 0.7123 |
| Belém | -1.09* | 0.0462* | 0.3416 | -0.089 | 2.95 | 0.7332 |
| Cametá | -1.51* | 0.0639* | 0.5423 | -0.101 | 2.57 | 0.8317 |
| Conceição do Araguaia | -0.6946* | 0.0362* | 0.4191 | -0.026 | 3.38 | 0.8059 |
| Itaituba | -1.01* | 0.0468* | 0.5812 | -0.066 | 3.08 | 0.8637 |
| Marabá | -0.9959* | 0.0466* | 0.5313 | -0.036 | 2.72 | 0.8322 |
| Monte Alegre | -0.9919* | 0.0492* | 0.4952 | -0.122 | 3.15 | 0.8037 |
| Óbidos | -0.7662* | 0.0369* | 0.548 | 0.014 | 2.90 | 0.8614 |
| Soure | -2.24* | 0.0902* | 0.4924 | -0.148 | 3.02 | 0.8210 |
| Tucuruí | -0.6428* | 0.0353* | 0.3423 | -0.169 | 2.85 | 0.7427 |
| Boa Vista | -0.7318* | 0.0377* | 0.5707 | 0.090 | 2.93 | 0.8549 |

Table 32. Coefficients of the model 25 Group II adjusted for the 20 weather stations (p-value 0.01*, 0.05** and not significantns).

| Weather Station | Coefficients | | | Statistical indices | | |
| --- | --- | --- | --- | --- | --- | --- |
| a | b | R^2 | MBE | RMSE | d |
| Rio Branco | -0.3427* | 0.5641* | 0.3911 | 0.019 | 3.61 | 0.7606 |
| Macapá | -1.71* | 1.71* | 0.5369 | 0.024 | 3.61 | 0.8387 |
| Barcelos | -0.1637* | 0.4542* | 0.2754 | 0.171 | 4.67 | 0.6157 |
| Eirunepé | -0.5596* | 0.6965* | 0.5222 | 0.024 | 2.85 | 0.8388 |
| Itacoatiara | -1.15* | 1.22* | 0.5038 | -0.012 | 3.61 | 0.8158 |
| Lábrea | -0.2658* | 0.5133* | 0.3793 | 0.085 | 3.14 | 0.6963 |
| Manaus | -1.05* | 1.13* | 0.3298 | 0.122 | 4.20 | 0.7189 |
| Parintins | -1.30* | 1.39* | 0.4279 | 0.290 | 4.22 | 0.7588 |
| S. G. da Cachoeira | -0.8922* | 0.9678* | 0.7365 | -0.026 | 2.64 | 0.9055 |
| Sinop | 0.0500* | 0.2996* | 0.1993 | 0.124 | 3.89 | 0.5952 |
| Belém | -0.8651* | 0.9247* | 0.2707 | -0.040 | 3.13 | 0.6840 |
| Cametá | -0.5260* | 0.3690ns | 0.2123 | - | - | - |
| Conceição do Araguaia | -0.1054* | 0.4012* | 0.3448 | 0.069 | 3.62 | 0.7144 |
| Itaituba | -0.9226* | 1.05* | 0.4926 | 0.030 | 3.49 | 0.8025 |
| Marabá | -0.3483* | 0.5937* | 0.3734 | -0.083 | 3.09 | 0.7361 |
| Monte Alegre | -0.8868* | 1.10* | 0.2795 | -0.131 | 3.54 | 0.6864 |
| Óbidos | -0.7007* | 0.7962* | 0.5211 | 9.334 | 9.96 | 0.4888 |
| Soure | -0.4014* | 0.3697ns | 0.2314 | - | - | - |
| Tucuruí | -0.4829* | 0.7054* | 0.2044 | -0.204 | 3.07 | 0.6576 |
| Boa Vista | -0.7790* | 0.9302* | 0.5024 | 0.093 | 3.07 | 0.8217 |

Table 33. Coefficients of the model 26 Group II adjusted for the 20 weather stations (p-value 0.01*, 0.05** and not significantns).

| Weather Station | Coefficients | | | | Statistical indices | | |
| --- | --- | --- | --- | --- | --- | --- | --- |
| a | b | c | R^2 | MBE | RMSE | d |
| Rio Branco | -1.82* | 2.46* | -0.5985* | 0.5183 | -0.008 | 3.18 | 0.8417 |
| Macapá | -9.72* | 14.05* | -4.73* | 0.5789 | 0.025 | 3.54 | 0.8519 |
| Barcelos | -1.20* | 1.55* | -0.2525* | 0.5085 | 0.066 | 3.75 | 0.8193 |
| Eirunepé | -2.42* | 3.22* | -0.8468* | 0.6064 | -0.020 | 2.60 | 0.8793 |
| Itacoatiara | -6.27* | 9.06* | -2.99* | 0.5445 | 0.042 | 3.49 | 0.8366 |
| Lábrea | -3.23* | 4.47* | -1.30* | 0.5308 | 0.183 | 2.81 | 0.7896 |
| Manaus | -7.49* | 10.84* | -3.64* | 0.4011 | 0.086 | 4.01 | 0.7653 |
| Parintins | -10.32* | 15.41* | -5.43* | 0.5066 | 0.294 | 3.92 | 0.7988 |
| S. G. da Cachoeira | -2.56* | 3.48* | -0.9346* | 0.7519 | -0.005 | 2.59 | 0.9108 |
| Sinop | -1.34* | 1.93* | -0.4662* | 0.3773 | 0.055 | 3.45 | 0.7447 |
| Belém | -5.39* | 7.56* | -2.42* | 0.3022 | -0.047 | 3.07 | 0.6977 |
| Cametá | -5.92* | 8.89* | -3.02* | 0.1832 | -0.197 | 3.40 | 0.5814 |
| Conceição do Araguaia | -1.85* | 2.52* | -0.6284* | 0.5206 | 0.069 | 3.13 | 0.8237 |
| Itaituba | -6.37* | 9.06* | -2.93* | 0.5843 | -0.020 | 3.08 | 0.8606 |
| Marabá | -3.26* | 4.48* | -1.28* | 0.533 | -0.065 | 2.69 | 0.8261 |
| Monte Alegre | -9.67* | 14.51* | -5.10* | 0.3578 | -0.087 | 3.45 | 0.7234 |
| Óbidos | -4.82* | 6.51* | -1.97* | 0.5881 | 0.029 | 2.85 | 0.8680 |
| Soure | -1.23* | 3.78ns | -0.9874ns | 0.2014 | - | - | - |
| Tucuruí | -3.34* | 4.95* | -1.57* | 0.2176 | -0.219 | 3.02 | 0.6794 |
| Boa Vista | -6.02* | 8.39* | -2.64* | 0.5581 | 0.072 | 2.91 | 0.8540 |

Table 34. Coefficients of the model 27 Group II adjusted for the 20 weather stations (p-value 0.01*, 0.05** and not significantns).

| Weather Station | Coefficients | | | | | Statistical indices | | |
| --- | --- | --- | --- | --- | --- | --- | --- | --- |
| a | b | c | d | R^2 | MBE | RMSE | d |
| Rio Branco | -5.10* | 8.23* | -3.85* | 0.5824* | 0.571 | -0.033 | 3.05 | 0.8629 |
| Macapá | 46.05* | -115.74* | 95.62* | -25.79* | 0.5942 | 0.056 | 3.43 | 0.8601 |
| Barcelos | -3.20* | 4.63* | -1.67* | 0.1774* | 0.6037 | -0.023 | 3.43 | 0.8664 |
| Eirunepé | -5.51* | 9.10* | -4.50* | 0.7409* | 0.6198 | -0.046 | 2.58 | 0.8831 |
| Itacoatiara | 14.76* | -39.11* | 33.65* | -9.25* | 0.5522 | 0.064 | 3.47 | 0.8402 |
| Lábrea | -7.07* | 12.04* | -6.23* | 1.05* | 0.5367 | 0.200 | 2.78 | 0.7925 |
| Manaus | -6.49* | 8.62ns | -2.01ns | -0.3971ns | 0.4012 | - | - | - |
| Parintins | 1.56ns | -12.21ns | 15.88ns | -5.46ns | 0.5082 | - | - | - |
| S. G. da Cachoeira | 0.4439ns | -3.28ns | 4.08* | -1.23* | 0.7527 | - | - | - |
| Sinop | -4.76* | 7.77* | -3.70* | 0.5829* | 0.4443 | 0.015 | 3.24 | 0.7994 |
| Belém | 16.28* | -40.72* | 33.30* | -8.78* | 0.3101 | -0.048 | 3.06 | 0.7044 |
| Cametá | -31.49* | 63.30* | -41.38* | 8.95* | 0.221 | -0.196 | 3.38 | 0.6063 |
| Conceição do Araguaia | -5.15* | 8.48* | -4.14* | 0.6759* | 0.5537 | 0.053 | 3.03 | 0.8381 |
| Itaituba | -6.43* | 9.18* | -3.01ns | 0.0214ns | 0.5843 | - | - | - |
| Marabá | -7.97* | 13.81* | -7.37* | 1.31* | 0.5464 | -0.056 | 2.66 | 0.8326 |
| Monte Alegre | -2.74ns | -1.22ns | 6.77ns | -2.98ns | 0.3584 | - | - | - |
| Óbidos | -2.94ns | 2.54ns | 0.8100ns | -0.6441ns | 0.5883 | - | - | - |
| Soure | -2.86ns | 1.22ns | 2.55* | 2.15ns | 0.4236 | - | - | - |
| Tucuruí | -12.16* | 24.63ns | -16.16ns | 3.59ns | 0.2185 | - | - | - |
| Boa Vista | -1.31ns | -1.71ns | 4.55ns | -1.70ns | 0.5587 | - | - | - |

Table 35. Coefficients of the model 28 Group II adjusted for the 20 weather stations (p-value 0.01*, 0.05** and not significantns).

| Weather Station | Coefficients | | | Statistical indices | | |
| --- | --- | --- | --- | --- | --- | --- |
| a | b | R^2 | MBE | RMSE | d |
| Rio Branco | -1.06* | 0.0121ns | 0.1782 | - | - | - |
| Macapá | -2.00* | 0.0927* | 0.5936 | 0.084 | 3.30 | 0.8724 |
| Barcelos | -1.65* | 0.0809* | 0.4914 | 0.078 | 3.70 | 0.8183 |
| Eirunepé | -0.5130* | 0.0363* | 0.1606 | 0.008 | 4.11 | 0.5565 |
| Itacoatiara | -1.38* | 0.0671* | 0.4647 | -0.054 | 3.87 | 0.7891 |
| Lábrea | -0.7474* | 0.0458* | 0.2194 | -0.083 | 3.27 | 0.7059 |
| Manaus | -1.04* | 0.0540* | 0.3714 | -0.006 | 3.90 | 0.7650 |
| Parintins | -1.69* | 0.0803* | 0.5908 | 0.095 | 3.49 | 0.8586 |
| S. G. da Cachoeira | -0.5013* | 0.0349* | 0.1835 | 0.219 | 4.29 | 0.5564 |
| Sinop | -0.7123* | 0.0217ns | 0.2113 | - | - | - |
| Belém | -0.8465* | 0.0463* | 0.1931 | -0.088 | 3.22 | 0.6200 |
| Cametá | -1.10* | 0.0599* | 0.3912 | -0.093 | 3.03 | 0.7403 |
| Conceição do Araguaia | -0.8721* | 0.0123ns | 0.1874 | - | - | - |
| Itaituba | -1.09* | 0.0586* | 0.3926 | -0.073 | 3.72 | 0.7701 |
| Marabá | -0.2147ns | 0.0189ns | 0.1796 | - | - | - |
| Monte Alegre | -1.04* | 0.0585* | 0.4004 | -0.123 | 3.41 | 0.7427 |
| Óbidos | -1.08* | 0.0575* | 0.4869 | -0.036 | 3.02 | 0.8392 |
| Soure | -1.79* | 0.0846* | 0.5256 | -0.057 | 2.93 | 0.8324 |
| Tucuruí | -0.8213* | 0.0482* | 0.2911 | -0.134 | 2.95 | 0.6937 |
| Boa Vista | -0.7483* | 0.0461* | 0.4513 | 0.113 | 3.26 | 0.7947 |

Table 36. Coefficients of the model 29 Group II adjusted for the 20 weather stations (p-value 0.01*, 0.05** and not significantns).

| Weather Station | Coefficients | | | Statistical indices | | |
| --- | --- | --- | --- | --- | --- | --- |
| a | b | R^2 | MBE | RMSE | d |
| Rio Branco | 1.46* | -1.41* | 0.5005 | -0.002 | 3.25 | 0.8297 |
| Macapá | 2.75* | -2.91* | 0.5561 | 0.023 | 3.55 | 0.8466 |
| Barcelos | 1.66* | -1.66* | 0.5271 | 0.055 | 3.75 | 0.8250 |
| Eirunepé | 1.52* | -1.53* | 0.5878 | -0.006 | 2.66 | 0.8699 |
| Itacoatiara | 2.05* | -2.10* | 0.5239 | 0.003 | 3.55 | 0.8265 |
| Lábrea | 1.32* | -1.21* | 0.4489 | 0.128 | 3.00 | 0.7389 |
| Manaus | 1.99* | -2.04* | 0.3578 | 0.114 | 4.12 | 0.7393 |
| Parintins | 2.32* | -2.35* | 0.4555 | 0.298 | 4.10 | 0.7759 |
| S. G. da Cachoeira | 1.69* | -1.71* | 0.7502 | -0.010 | 2.60 | 0.9100 |
| Sinop | 1.13* | -0.9419* | 0.3199 | 0.109 | 3.56 | 0.7017 |
| Belém | 1.68* | -1.74* | 0.2854 | -0.042 | 3.10 | 0.6926 |
| Cametá | 1.12ns | -0.6521ns | 0.2126 | - | - | - |
| Conceição do Araguaia | 1.27* | -1.15* | 0.4657 | 0.079 | 3.30 | 0.7894 |
| Itaituba | 1.98* | -1.99* | 0.5347 | 0.021 | 3.32 | 0.8290 |
| Marabá | 1.48* | -1.39* | 0.4601 | -0.068 | 2.88 | 0.7869 |
| Monte Alegre | 2.04* | -1.94* | 0.3026 | -0.125 | 3.51 | 0.7010 |
| Óbidos | 1.62* | -1.69* | 0.5542 | 0.006 | 2.95 | 0.8538 |
| Soure | 0.9824* | -2.51ns | 0.3012 | - | - | - |
| Tucuruí | 1.42* | -1.28* | 0.2119 | -0.210 | 3.05 | 0.6681 |
| Boa Vista | 1.86* | -1.87* | 0.5269 | 0.082 | 3.00 | 0.8364 |

Table 37. Coefficients of the model 30 Group II adjusted for the 20 weather stations (p-value 0.01*, 0.05** and not significantns).

| Weather Station | Coefficients | | | Statistical indices | | |
| --- | --- | --- | --- | --- | --- | --- |
| a | b | R^2 | MBE | RMSE | d |
| Rio Branco | 0.1044* | 0.0386* | 0.5502 | -0.060 | 3.09 | 0.8576 |
| Macapá | -0.0642* | 0.0788* | 0.6276 | 0.047 | 3.23 | 0.8806 |
| Barcelos | 0.0806* | 0.0427* | 0.5582 | 0.048 | 3.56 | 0.8455 |
| Eirunepé | 0.0559* | 0.0402* | 0.6188 | -0.040 | 2.58 | 0.8816 |
| Itacoatiara | 0.0347* | 0.0547* | 0.576 | -0.002 | 3.36 | 0.8512 |
| Lábrea | 0.1636* | 0.0313* | 0.4862 | 0.136 | 2.93 | 0.7673 |
| Manaus | 0.0220* | 0.0541* | 0.4306 | 0.097 | 3.83 | 0.7902 |
| Parintins | 0.0291* | 0.0653* | 0.5397 | 0.275 | 3.81 | 0.8224 |
| S. G. da Cachoeira | 0.0404* | 0.0464* | 0.7761 | -0.057 | 2.43 | 0.9237 |
| Sinop | 0.2656* | 0.0223* | 0.2973 | 0.075 | 3.61 | 0.6968 |
| Belém | 0.0094ns | 0.0448* | 0.3208 | - | - | - |
| Cametá | 0.1693* | 0.0473* | 0.256 | -0.213 | 3.26 | 0.6451 |
| Conceição do Araguaia | 0.1950* | 0.0276* | 0.4657 | 0.065 | 3.27 | 0.7994 |
| Itaituba | 0.0863* | 0.0493* | 0.5646 | 0.008 | 3.21 | 0.8448 |
| Marabá | 0.1583* | 0.0357* | 0.4896 | -0.061 | 2.80 | 0.8049 |
| Monte Alegre | 0.1423* | 0.0552* | 0.3915 | -0.132 | 3.32 | 0.7585 |
| Óbidos | 0.0712* | 0.0374* | 0.5512 | 0.008 | 2.92 | 0.8574 |
| Soure | 0.0521* | 0.0114ns | 0.2125 | - | - | - |
| Tucuruí | 0.1787* | 0.0356* | 0.2735 | -0.200 | 2.95 | 0.7092 |
| Boa Vista | 0.0988* | 0.0445* | 0.5792 | 0.071 | 2.86 | 0.8604 |

Table 38. Coefficients of the model 31 Group II adjusted for the 20 weather stations (p-value 0.01*, 0.05** and not significantns).

| Weather Station | Coefficients | | | | | Statistical indices | | |
| --- | --- | --- | --- | --- | --- | --- | --- | --- |
| a | b | c | d | R^2 | MBE | RMSE | d |
| Rio Branco | 0.2688ns | -0.0493* | 0.0277* | 0.0006* | 0.5633 | - | - | - |
| Macapá | -4.29* | 0.0998ns | 0.1670* | -0.0037* | 0.7175 | - | - | - |
| Barcelos | -3.99* | 0.1284* | 0.1509* | -0.0045* | 0.6117 | 0.019 | 3.21 | 0.8805 |
| Eirunepé | 1.23* | -0.0980* | -0.0047ns | 0.0021* | 0.6365 | - | - | - |
| Itacoatiara | -6.54* | 0.2224* | 0.2318* | -0.0074* | 0.6671 | -0.038 | 3.02 | 0.8914 |
| Lábrea | 2.33* | -0.1404* | -0.0462* | 0.0038* | 0.5589 | 0.170 | 2.70 | 0.8252 |
| Manaus | -4.17* | 0.1219* | 0.1573* | -0.0043* | 0.5153 | 0.020 | 3.43 | 0.8445 |
| Parintins | -6.63* | 0.2153* | 0.2331* | -0.0071* | 0.6875 | 0.231 | 3.10 | 0.8942 |
| S. G. da Cachoeira | 0.1897ns | -0.0568* | 0.0337* | 0.0006ns | 0.789 | - | - | - |
| Sinop | 3.32* | -0.1764* | -0.0734* | 0.0048* | 0.3564 | 0.023 | 3.40 | 0.7537 |
| Belém | -2.57* | 0.0608ns | 0.1052* | -0.0024ns | 0.3569 | - | - | - |
| Cametá | -5.88* | 0.1817* | 0.2021* | -0.0057* | 0.5513 | -0.098 | 2.53 | 0.8363 |
| Conceição do Araguaia | 3.06* | -0.1666* | -0.0603* | 0.0042* | 0.5191 | 0.064 | 3.11 | 0.8313 |
| Itaituba | -5.98* | 0.2054* | 0.2121* | -0.0068* | 0.6231 | -0.022 | 2.96 | 0.8770 |
| Marabá | 1.35* | -0.1036* | -0.0133ns | 0.0026* | 0.5714 | - | - | - |
| Monte Alegre | -10.64* | 0.4002* | 0.3628* | -0.0129* | 0.5617 | -0.123 | 2.91 | 0.8389 |
| Óbidos | -2.22* | 0.0625ns | 0.0930* | -0.0024ns | 0.5663 | - | - | - |
| Soure | -14.91* | 0.5400* | 0.4841* | -0.0168* | 0.5487 | -0.133 | 2.92 | 0.8419 |
| Tucuruí | -5.21* | 0.1932* | 0.1885* | -0.0064* | 0.3644 | -0.153 | 2.78 | 0.7571 |
| Boa Vista | -3.01* | 0.0891* | 0.1227* | -0.0033* | 0.6122 | 0.073 | 2.77 | 0.8746 |

Table 39. Coefficients of the model 32 Group II adjusted for the 20 weather stations (p-value 0.01*, 0.05** and not significantns).

| Weather Station | Coefficients | | | | Statistical indices | | |
| --- | --- | --- | --- | --- | --- | --- | --- |
| a | b | c | R^2 | MBE | RMSE | d |
| Rio Branco | -0.0947* | -0.0320* | 0.0403* | 0.5619 | -0.092 | 3.06 | 0.8649 |
| Macapá | -1.47* | -0.0194* | 0.0783* | 0.7164 | 0.094 | 2.77 | 0.9186 |
| Barcelos | -0.6610* | -0.0181* | 0.0484* | 0.6062 | 0.022 | 3.25 | 0.8779 |
| Eirunepé | -0.1773* | -0.0323* | 0.0420* | 0.6295 | -0.052 | 2.56 | 0.8844 |
| Itacoatiara | -0.8889* | -0.0147* | 0.0535* | 0.6506 | -0.002 | 3.13 | 0.8815 |
| Lábrea | -0.3256* | -0.0185* | 0.0374* | 0.529 | 0.152 | 2.83 | 0.8001 |
| Manaus | -0.7275* | -0.0216* | 0.0528* | 0.5048 | 0.039 | 3.48 | 0.8388 |
| Parintins | -1.19* | -0.0107* | 0.0621* | 0.6742 | 0.221 | 3.17 | 0.8903 |
| S. G. da Cachoeira | -0.2970* | -0.0356* | 0.0492* | 0.7889 | -0.087 | 2.32 | 0.9321 |
| Sinop | 0.0584ns | -0.0168* | 0.0252* | 0.308 | - | - | - |
| Belém | -0.7150* | -0.0188* | 0.0482* | 0.3563 | -0.074 | 2.92 | 0.7430 |
| Cametá | -1.43* | -0.0067* | 0.0664* | 0.5457 | -0.112 | 2.56 | 0.8336 |
| Conceição do Araguaia | -0.2085* | -0.0179* | 0.0333* | 0.4977 | 0.036 | 3.15 | 0.8265 |
| Itaituba | -0.5811* | -0.0230* | 0.0505* | 0.6082 | -0.032 | 3.01 | 0.8710 |
| Marabá | -0.5941* | -0.0158* | 0.0452* | 0.5681 | -0.034 | 2.60 | 0.8458 |
| Monte Alegre | -0.7748* | -0.0177* | 0.0557* | 0.5118 | -0.126 | 3.08 | 0.8155 |
| Óbidos | -0.3470* | -0.0202* | 0.0382* | 0.5645 | 0.013 | 2.86 | 0.8658 |
| Soure | -2.18* | 0.0148* | 0.0760* | 0.5148 | -0.134 | 2.95 | 0.8335 |
| Tucuruí | -0.4923* | -0.0096* | 0.0377* | 0.3497 | -0.176 | 2.83 | 0.7505 |
| Boa Vista | -0.3490* | -0.0252* | 0.0442* | 0.6079 | 0.068 | 2.79 | 0.8726 |

Table 40. Coefficients of the model 33 Group II adjusted for the 20 weather stations (p-value 0.01*, 0.05** and not significantns).

| Weather Station | Coefficients | | | | Statistical indices | | |
| --- | --- | --- | --- | --- | --- | --- | --- |
| a | b | c | R^2 | MBE | RMSE | d |
| Rio Branco | 1.95* | -0.0348* | 0.0376* | 0.5621 | -0.019 | 3.05 | 0.8569 |
| Macapá | -11.82* | -0.0637* | 0.0757* | 0.6342 | 0.075 | 3.24 | 0.8795 |
| Barcelos | -4.27* | -0.0340* | 0.0427* | 0.5715 | 0.075 | 3.47 | 0.8517 |
| Eirunepé | 1.65* | -0.0382* | 0.0391* | 0.625 | -0.006 | 2.56 | 0.8796 |
| Itacoatiara | -0.2027ns | -0.0491* | 0.0518* | 0.5834 | - | - | - |
| Lábrea | -0.7596ns | -0.0256* | 0.0331* | 0.5111 | - | - | - |
| Manaus | 0.0028ns | -0.0470* | 0.0495* | 0.4386 | - | - | - |
| Parintins | -7.98* | -0.0474* | 0.0595* | 0.5608 | 0.301 | 3.66 | 0.8328 |
| S. G. da Cachoeira | -1.18ns | -0.0430* | 0.0462* | 0.7795 | - | - | - |
| Sinop | 5.17* | -0.0155* | 0.0218* | 0.3293 | 0.112 | 3.54 | 0.6914 |
| Belém | 10.92* | -0.0508* | 0.0402* | 0.3461 | -0.002 | 2.97 | 0.7054 |
| Cametá | -9.32* | -0.0286* | 0.0466* | 0.3481 | -0.147 | 3.06 | 0.6944 |
| Conceição do Araguaia | 2.48* | -0.0226* | 0.0282* | 0.4927 | 0.099 | 3.17 | 0.8069 |
| Itaituba | 0.3354ns | -0.0436* | 0.0475* | 0.5762 | - | - | - |
| Marabá | 1.21ns | -0.0300* | 0.0356* | 0.5211 | - | - | - |
| Monte Alegre | 1.28ns | -0.0431* | 0.0494* | 0.4315 | - | - | - |
| Óbidos | 5.62* | -0.0397* | 0.0365* | 0.5645 | 0.050 | 2.88 | 0.8547 |
| Soure | -20.67* | 0.0161* | 0.0231* | 0.2499 | -0.065 | 3.69 | 0.6223 |
| Tucuruí | 6.02* | -0.0314* | 0.0329* | 0.3239 | -0.143 | 2.85 | 0.7026 |
| Boa Vista | 2.34* | -0.0405* | 0.0427* | 0.5933 | 0.115 | 2.81 | 0.8588 |

Table 41. Coefficients of the model 34 Group II adjusted for the 20 weather stations (p-value 0.01*, 0.05** and not significantns).

| Weather Station | Coefficients | | | | Statistical indices | | |
| --- | --- | --- | --- | --- | --- | --- | --- |
| a | b | c | R^2 | MBE | RMSE | d |
| Rio Branco | 0.4472ns | 0.0851* | 0.7530* | 0.57 | - | - | - |
| Macapá | -1.63ns | 0.0757* | 1.00* | 0.6245 | - | - | - |
| Barcelos | -4.04* | 0.1434* | 0.6390* | 0.5815 | 0.057 | 3.45 | 0.8563 |
| Eirunepé | 0.6178ns | 0.0605* | 0.8640* | 0.6271 | - | - | - |
| Itacoatiara | 2.06* | 0.0509* | 1.00* | 0.5824 | 0.051 | 3.34 | 0.8468 |
| Lábrea | -1.29ns | 0.1292* | 0.6029* | 0.5131 | - | - | - |
| Manaus | 2.53* | 0.0438* | 1.04* | 0.4376 | 0.158 | 3.80 | 0.7787 |
| Parintins | 0.3420ns | 0.0825* | 0.9044* | 0.5449 | - | - | - |
| S. G. da Cachoeira | -0.1217ns | 0.0692* | 0.8646* | 0.7793 | - | - | - |
| Sinop | 2.51* | 0.1263* | 0.5296* | 0.3586 | 0.106 | 3.44 | 0.7213 |
| Belém | 5.87* | 0.0086* | 1.52* | 0.3403 | -0.009 | 2.97 | 0.7042 |
| Cametá | 3.64* | 0.0878* | 0.7848* | 0.2765 | -0.181 | 3.21 | 0.6369 |
| Conceição do Araguaia | 0.6991ns | 0.1120* | 0.6138* | 0.5141 | - | - | - |
| Itaituba | 0.0446ns | 0.0946* | 0.7855* | 0.5794 | - | - | - |
| Marabá | 1.42ns | 0.0945* | 0.7058* | 0.5262 | - | - | - |
| Monte Alegre | 7.15* | 0.0410* | 1.07* | 0.4249 | -0.076 | 3.22 | 0.7538 |
| Óbidos | 1.79ns | 0.0510* | 0.8932* | 0.5637 | - | - | - |
| Soure | 1.05* | 0.1124ns | 0.2145ns | 0.2564 | - | - | - |
| Tucuruí | 9.55* | 0.0113* | 1.37* | 0.3283 | -0.141 | 2.85 | 0.7034 |
| Boa Vista | 4.04* | 0.0422* | 1.01* | 0.5924 | 0.111 | 2.81 | 0.8589 |

Table 42. Coefficients of the model 35 Group II adjusted for the 20 weather stations (p-value 0.01*, 0.05** and not significantns).

| Weather Station | Coefficients | | | | Statistical indices | | |
| --- | --- | --- | --- | --- | --- | --- | --- |
| a | b | c | R^2 | MBE | RMSE | d |
| Rio Branco | -0.2054* | 0.1586* | 0.0024* | 0.5959 | -0.091 | 2.93 | 0.8794 |
| Macapá | -0.2501* | -0.2016* | 0.0177* | 0.7291 | 0.072 | 2.72 | 0.9223 |
| Barcelos | -0.1480* | -0.0693* | 0.0104* | 0.6481 | 0.000 | 3.04 | 0.8956 |
| Eirunepé | -0.2553* | 0.1472* | 0.0030* | 0.6512 | -0.068 | 2.51 | 0.8914 |
| Itacoatiara | -0.1826* | -0.0277ns | 0.0094* | 0.6371 | - | - | - |
| Lábrea | -0.0843* | -0.0200ns | 0.0074* | 0.5884 | - | - | - |
| Manaus | -0.1898* | -0.0343* | 0.0094* | 0.5232 | 0.050 | 3.44 | 0.8444 |
| Parintins | -0.1182* | -0.2181* | 0.0164* | 0.6815 | 0.186 | 3.08 | 0.8961 |
| S. G. da Cachoeira | -0.2515* | 0.1637* | 0.0027* | 0.7869 | -0.052 | 2.36 | 0.9290 |
| Sinop | -0.0140ns | 0.1664* | -0.0002ns | 0.3448 | - | - | - |
| Belém | -0.2182* | -0.0032ns | 0.0078* | 0.3832 | - | - | - |
| Cametá | -0.0942* | -0.2688* | 0.0179* | 0.5636 | -0.154 | 2.56 | 0.8365 |
| Conceição do Araguaia | -0.1008* | 0.0962* | 0.0032* | 0.5459 | 0.052 | 3.01 | 0.8458 |
| Itaituba | -0.1920* | 0.0645* | 0.0064* | 0.6281 | -0.012 | 2.94 | 0.8788 |
| Marabá | -0.1423* | 0.0240ns | 0.0069* | 0.5875 | - | - | - |
| Monte Alegre | -0.0286ns | -0.1242* | 0.0123* | 0.5166 | - | - | - |
| Óbidos | -0.1648* | 0.0646ns | 0.0048* | 0.5945 | - | - | - |
| Soure | 0.3243* | -0.9916* | 0.0393* | 0.5422 | -0.067 | 2.91 | 0.8348 |
| Tucuruí | 0.0655* | -0.1478* | 0.0108* | 0.3919 | -0.168 | 2.72 | 0.7746 |
| Boa Vista | -0.1597* | 0.0662* | 0.0056* | 0.6272 | 0.047 | 2.69 | 0.8835 |

Table 43. Coefficients of the model 36 Group II adjusted for the 20 weather stations (p-value 0.01*, 0.05** and not significantns).

| Weather Station | Coefficients | | | | Statistical indices | | |
| --- | --- | --- | --- | --- | --- | --- | --- |
| a | b | c | R^2 | MBE | RMSE | d |
| Rio Branco | -2.77ns | 2.58ns | 0.1041ns | 0.5955 | - | - | - |
| Macapá | -0.7379* | 0.5274* | 0.4374* | 0.6364 | 0.038 | 3.23 | 0.8821 |
| Barcelos | -8.77ns | 8.47ns | 0.0401ns | 0.6151 | - | - | - |
| Eirunepé | -1.08ns | 0.9167ns | 0.2289* | 0.6432 | - | - | - |
| Itacoatiara | -1.95ns | 1.75ns | 0.1582ns | 0.5982 | - | - | - |
| Lábrea | -157.96ns | 157.73ns | 0.0019ns | 0.5461 | - | - | - |
| Manaus | -17.93ns | 17.59ns | 0.0215ns | 0.4616 | - | - | - |
| Parintins | -21.95ns | 21.65ns | 0.0187ns | 0.5749 | - | - | - |
| S. G. da Cachoeira | -0.1316* | 0.1429* | 0.6483* | 0.7819 | -0.044 | 2.41 | 0.9253 |
| Sinop | -166.85ns | 166.74ns | 0.0015ns | 0.3937 | - | - | - |
| Belém | -0.8496ns | 0.6606ns | 0.2960* | 0.3297 | - | - | - |
| Cametá | -136.00ns | 135.76ns | 0.0027ns | 0.3031 | - | - | - |
| Conceição do Araguaia | -129.28ns | 129.05ns | 0.0023ns | 0.5595 | - | - | - |
| Itaituba | -29.65ns | 29.35ns | 0.0128ns | 0.6124 | - | - | - |
| Marabá | -191.21ns | 190.94ns | 0.0018ns | 0.5756 | - | - | - |
| Monte Alegre | -148.38ns | 148.14ns | 0.0027ns | 0.4375 | - | - | - |
| Óbidos | -91.79ns | 91.42ns | 0.0038ns | 0.5956 | - | - | - |
| Soure | -15.65ns | 33.56ns | 0.0236ns | 0.2314 | - | - | - |
| Tucuruí | -19.81ns | 19.71ns | 0.0137ns | 0.2877 | - | - | - |
| Boa Vista | -14.27ns | 13.92ns | 0.0271ns | 0.6031 | - | - | - |

Table 44. Coefficients of the model 37 Group II adjusted for the 20 weather stations (p-value 0.01*, 0.05** and not significantns).

| Weather Station | Coefficients | | | | Statistical indices | | |
| --- | --- | --- | --- | --- | --- | --- | --- |
| a | b | c | R^2 | MBE | RMSE | d |
| Rio Branco | 1.13* | -0.8915* | -1.20* | 0.2765 | 0.095 | 4.06 | 0.6467 |
| Macapá | 1.16* | -3797.29ns | -3.72* | 0.6243 | - | - | - |
| Barcelos | 0.0046* | 4.63E-08* | 3.83* | 0.4000 | 0.081 | 4.02 | 0.7660 |
| Eirunepé | 1.13* | -2.24* | -1.46* | 0.2849 | 0.133 | 3.81 | 0.5879 |
| Itacoatiara | 0.7600* | -2542546ns | -5.91* | 0.5312 | - | - | - |
| Lábrea | 1.04* | -6.99* | -1.85* | 0.3081 | 0.034 | 3.16 | 0.6488 |
| Manaus | 0.9315* | -750.68ns | -3.30* | 0.4567 | - | - | - |
| Parintins | 0.8185* | -133852187ns | -7.11* | 0.6769 | - | - | - |
| S. G. da Cachoeira | 0.0445ns | 1.20E-05ns | 2.05* | 0.1654 | - | - | - |
| Sinop | 1.08* | -3.51* | -1.68* | 0.2839 | 0.048 | 3.67 | 0.6535 |
| Belém | 1.01* | -14.67* | -2.05* | 0.2801 | -0.044 | 3.08 | 0.6521 |
| Cametá | 0.7327* | -24592601318ns | -8.83* | 0.4866 | - | - | - |
| Conceição do Araguaia | 1.23* | -3.06* | -1.53* | 0.306 | 0.073 | 3.56 | 0.7219 |
| Itaituba | 0.7663* | -46059339ns | -6.84* | 0.5141 | - | - | - |
| Marabá | 1.24* | -9.63* | -1.87* | 0.3649 | -0.006 | 3.19 | 0.6892 |
| Monte Alegre | 0.7661* | -3751328432ns | -8.24* | 0.5332 | - | - | - |
| Óbidos | 0.6661* | -2705169991ns | -8.20* | 0.6063 | - | - | - |
| Soure | 0.8622* | -24887467ns | -6.56* | 0.5691 | - | - | - |
| Tucuruí | 0.7957* | -1455.11ns | -3.65* | 0.3233 | - | - | - |
| Boa Vista | 0.3058* | 1.64E-09* | 4.55* | 0.3773 | 0.124 | 3.48 | 0.7463 |

Table 45. Coefficients of the model 38 Group II adjusted for the 20 weather stations (p-value 0.01*, 0.05** and not significantns).

| Weather Station | Coefficients | | | Statistical indices | | |
| --- | --- | --- | --- | --- | --- | --- |
| a | b | R^2 | MBE | RMSE | d |
| Rio Branco | 1.39E-09* | 1.36ns | 0.1478 | - | - | - |
| Macapá | 3.39E-09* | 4.61* | 0.5057 | 0.030 | 3.65 | 0.8404 |
| Barcelos | 5.18E-08* | 3.80* | 0.4000 | 0.079 | 4.02 | 0.7665 |
| Eirunepé | 3.44E-08ns | 2.32ns | 0.3111 | - | - | - |
| Itacoatiara | 7.64E-08* | 3.62* | 0.3473 | -0.133 | 4.26 | 0.7373 |
| Lábrea | 3.28E-07* | 1.21ns | 0.2123 | - | - | - |
| Manaus | 7.08E-07* | 2.93* | 0.2299 | -0.120 | 4.34 | 0.7091 |
| Parintins | 5.13E-08* | 3.77* | 0.4545 | 0.018 | 3.93 | 0.8126 |
| S. G. da Cachoeira | 1.23E-06* | 4.51ns | 0.2451 | - | - | - |
| Sinop | 2.89E-09* | 3.56ns | 0.1897 | - | - | - |
| Belém | 4.89E-08ns | 2.69ns | 0.3217 | - | - | - |
| Cametá | 1.46E-06* | 2.78* | 0.2089 | -0.214 | 3.45 | 0.6884 |
| Conceição do Araguaia | 5.38E-09ns | 3.21ns | 0.3214 | - | - | - |
| Itaituba | 1.33E-06* | 2.79* | 0.1847 | -0.242 | 4.36 | 0.6922 |
| Marabá | 4.28E-05* | 2.05ns | 0.2368 | - | - | - |
| Monte Alegre | 3.96E-06* | 2.49* | 0.2154 | -0.235 | 3.84 | 0.6779 |
| Óbidos | 1.58E-06* | 2.72* | 0.3075 | -0.171 | 3.57 | 0.7729 |
| Soure | 1.09E-08* | 4.25* | 0.4300 | -0.119 | 3.22 | 0.7997 |
| Tucuruí | 2.89E-09ns | 2.08ns | 0.2314 | - | - | - |
| Boa Vista | 2.77E-05* | 1.88* | 0.3318 | 0.038 | 3.60 | 0.7556 |

Table 46. Coefficients of the model 39 Group II adjusted for the 20 weather stations (p-value 0.01*, 0.05** and not significantns).

| Weather Station | Coefficients | | | | Statistical indices | | |
| --- | --- | --- | --- | --- | --- | --- | --- |
| a | b | c | R^2 | MBE | RMSE | d |
| Rio Branco | 0.0665ns | 0.0698ns | 1.02ns | 0.1684 | - | - | - |
| Macapá | 0.2314ns | 0.0214* | 0.9147ns | 0.2417 | - | - | - |
| Barcelos | 1.22E-17* | 27.39* | 0.1015* | 0.4435 | 0.151 | 3.89 | 0.7743 |
| Eirunepé | 0.0002ns | 2.81ns | 0.3006ns | 0.1615 | - | - | - |
| Itacoatiara | 1.21E-15* | 23.29* | 0.1101* | 0.4273 | 0.000 | 3.99 | 0.7550 |
| Lábrea | 0.1159ns | 0.0019ns | 2 | 0.2404 | - | - | - |
| Manaus | 1.48E-13* | 20.33* | 0.1040* | 0.3428 | 0.033 | 4.01 | 0.7332 |
| Parintins | 0.0025* | 2.65ns | 1.78ns | 0.2568 | - | - | - |
| S. G. da Cachoeira | 9.02E-09* | 12.31* | 0.1101* | 0.1725 | 0.249 | 4.33 | 0.5218 |
| Sinop | 2.33E-05ns | 4.21ns | 0.6587ns | 0.2479 | - | - | - |
| Belém | 4.61E-08* | 8.83* | 0.1799* | 0.1803 | -0.082 | 3.25 | 0.5988 |
| Cametá | 1.23E-11* | 16.82* | 0.1134* | 0.3652 | -0.090 | 3.08 | 0.7154 |
| Conceição do Araguaia | 7.11E-07ns | 7.89** | 0.7894ns | 0.2478 | - | - | - |
| Itaituba | 4.59E-14* | 22.01* | 0.0937* | 0.3588 | -0.044 | 3.84 | 0.7342 |
| Marabá | 6.11E-11ns | 15.78ns | 0.3218ns | 0.2178 | - | - | - |
| Monte Alegre | 2.36E-13* | 21.11* | 0.0904* | 0.3681 | -0.105 | 3.48 | 0.7113 |
| Óbidos | 7.90E-18* | 30.15* | 0.0749* | 0.4400 | -0.011 | 3.17 | 0.8031 |
| Soure | 2.20E-13* | 17.49* | 0.1472* | 0.4971 | -0.044 | 3.01 | 0.8142 |
| Tucuruí | 8.16E-07ns | 6.80ns | 0.2030ns | 0.2836 | - | - | - |
| Boa Vista | 1.26E-09* | 13.53* | 0.1152* | 0.4384 | 0.131 | 3.30 | 0.7806 |

Table 47. Coefficients of the model 40 Group II adjusted for the 20 weather stations (p-value 0.01*, 0.05** and not significantns).

| Weather Station | Coefficients | | | | Statistical indices | | |
| --- | --- | --- | --- | --- | --- | --- | --- |
| a | b | c | R^2 | MBE | RMSE | d |
| Rio Branco | 0.8537* | -0.0680* | 0.0021* | 0.1744 | -0.068 | 4.40 | 0.6326 |
| Macapá | -9.01* | 0.6116* | -0.0095* | 0.6089 | 0.077 | 3.23 | 0.8781 |
| Barcelos | -13.35* | 0.9682* | -0.0167* | 0.5647 | 0.044 | 3.45 | 0.8556 |
| Eirunepé | 0.1057ns | -0.0126ns | 0.0009ns | 0.1621 | - | - | - |
| Itacoatiara | -10.40* | 0.7297* | -0.0121* | 0.5212 | -0.099 | 3.62 | 0.8255 |
| Lábrea | 2.31* | -0.1905* | 0.0045* | 0.2506 | -0.067 | 3.20 | 0.7378 |
| Manaus | -7.76* | 0.5374* | -0.0086* | 0.4245 | -0.019 | 3.71 | 0.7986 |
| Parintins | -13.52* | 0.9450* | -0.0157* | 0.6712 | 0.143 | 3.20 | 0.8850 |
| S. G. da Cachoeira | -11.37* | 0.8539* | -0.0153* | 0.2968 | 0.162 | 4.00 | 0.6877 |
| Sinop | -7.89** | 0.6897ns | -0.0368ns | 0.3148 | - | - | - |
| Belém | -10.63* | 0.7691* | -0.0133* | 0.2383 | -0.072 | 3.16 | 0.6513 |
| Cametá | -13.27* | 0.9454* | -0.0160* | 0.4844 | -0.049 | 2.76 | 0.7967 |
| Conceição do Araguaia | -9.87ns | -0.8921ns | -0.0127ns | 0.3214 | - | - | - |
| Itaituba | -11.64* | 0.8240* | -0.0138* | 0.4971 | -0.075 | 3.34 | 0.8320 |
| Marabá | -11.68* | 0.8668* | -0.0153* | 0.1992 | -0.099 | 3.59 | 0.6373 |
| Monte Alegre | -14.43* | 1.03* | -0.0177* | 0.5492 | -0.092 | 2.92 | 0.8250 |
| Óbidos | -9.71* | 0.6947* | -0.0117* | 0.6016 | 0.032 | 2.62 | 0.8904 |
| Soure | -14.79* | 1.03* | -0.0174* | 0.5663 | -0.040 | 2.85 | 0.8444 |
| Tucuruí | -4.52* | 0.3267* | -0.0052* | 0.3009 | -0.124 | 2.91 | 0.7048 |
| Boa Vista | -7.36* | 0.5247* | -0.0086* | 0.4954 | 0.105 | 3.12 | 0.8242 |

Table 48. Coefficients of the model 41 Group II adjusted for the 20 weather stations (p-value 0.01*, 0.05** and not significantns).

| Weather Station | Coefficients | | | | | Statistical indices | | |
| --- | --- | --- | --- | --- | --- | --- | --- | --- |
| a | b | c | d | R^2 | MBE | RMSE | d |
| Rio Branco | 4.35* | -3.35* | 0.7203* | -1.92* | 0.6089 | -0.088 | 2.90 | 0.8842 |
| Macapá | 10.56* | -7.09* | 1.30* | -2.00* | 0.6484 | 0.139 | 3.29 | 0.8716 |
| Barcelos | -0.1320* | 0.0807* | -0.0026* | 0.1087ns | 0.6462 | - | - | - |
| Eirunepé | -0.0305ns | 0.0417ns | -0.0014* | 0.2972ns | 0.6508 | - | - | - |
| Itacoatiara | 7.29* | -5.24* | 1.07* | -2.03* | 0.6100 | 0.039 | 3.26 | 0.8644 |
| Lábrea | -0.0093ns | 0.0359ns | -0.0014ns | 0.3881ns | 0.5802 | - | - | - |
| Manaus | 10.86* | -7.40* | 1.36* | -2.12* | 0.4750 | 0.071 | 3.71 | 0.8127 |
| Parintins | 4.49* | -4.12* | 0.9958* | -1.99* | 0.5850 | 0.316 | 3.54 | 0.8478 |
| S. G. da Cachoeira | 0.0508* | 0.0058ns | -0.0003ns | 0.8085ns | 0.7846 | - | - | - |
| Sinop | -0.0240ns | 0.0582* | -0.0018* | 0.1363ns | 0.4656 | - | - | - |
| Belém | 11.06* | -6.52* | 1.06* | -2.05* | 0.3376 | -0.038 | 3.00 | 0.7188 |
| Cametá | -0.9629* | 0.3950* | -0.0146* | -0.3895* | 0.3294 | -0.179 | 3.13 | 0.6974 |
| Conceição do Araguaia | -0.1167* | 0.0849* | -0.0022* | -0.0080ns | 0.5853 | - | - | - |
| Itaituba | 9.76* | -6.96* | 1.33* | -2.10* | 0.6316 | -0.031 | 2.89 | 0.8834 |
| Marabá | -0.1394* | 0.0886* | -0.0030* | 0.0901ns | 0.6056 | - | - | - |
| Monte Alegre | 58.68* | -35.04* | 5.67* | -2.62* | 0.4706 | -0.047 | 3.14 | 0.7887 |
| Óbidos | 22.67* | -12.90* | 1.90* | -2.25* | 0.6200 | -0.005 | 2.75 | 0.8816 |
| Soure | 2.39ns | -7.89* | 2.78ns | -4.69ns | 0.3218 | - | - | - |
| Tucuruí | -0.7686ns | 0.3790ns | -0.0018ns | -0.7287ns | 0.2888 | - | - | - |
| Boa Vista | 6.19* | -4.48* | 0.8822* | -1.95* | 0.6096 | 0.045 | 2.77 | 0.8760 |

Table 49. Coefficients of the model 42 Group II adjusted for the 20 weather stations (p-value 0.01*, 0.05** and not significantns).

| Weather Station | Coefficients | | | | | Statistical indices | | |
| --- | --- | --- | --- | --- | --- | --- | --- | --- |
| a | b | c | d | R^2 | MBE | RMSE | d |
| Rio Branco | -0.0520ns | 0.0573* | 0.0016ns | -1.66E-04* | 0.6213 | - | - | - |
| Macapá | 0.3902* | -0.2043* | 0.0505* | -0.0027* | 0.663 | 0.070 | 3.11 | 0.8906 |
| Barcelos | -0.2008* | 0.1052* | -0.0032* | -2.81E-06ns | 0.6454 | - | - | - |
| Eirunepé | -0.0783ns | 0.0634* | 3.82E-05ns | -8.82E-05ns | 0.6503 | - | - | - |
| Itacoatiara | 0.0649ns | -0.0044ns | 0.0142* | -8.67E-04* | 0.6181 | - | - | - |
| Lábrea | -0.0729ns | 0.0659* | 3.96E-04ns | -1.25E-04ns | 0.5797 | - | - | - |
| Manaus | -0.1452* | 0.0750* | 0.0031ns | -3.62E-04* | 0.4852 | - | - | - |
| Parintins | -0.0216ns | 0.0176ns | 0.0170* | -0.0012* | 0.6012 | - | - | - |
| S. G. da Cachoeira | 0.0194ns | 0.0413* | 0.0024* | -1.66E-04* | 0.7846 | - | - | - |
| Sinop | -0.0973* | 0.0866* | -0.0025* | -4.15E-07ns | 0.4646 | - | - | - |
| Belém | 0.2403* | -0.0934* | 0.0221* | -0.0011* | 0.3478 | -0.056 | 2.97 | 0.7298 |
| Cametá | -0.7003* | 0.3111* | -0.0238* | 5.86E-04* | 0.3378 | -0.177 | 3.12 | 0.7001 |
| Conceição do Araguaia | -0.1494* | 0.0946* | -0.0033* | 2.92E-05ns | 0.5858 | - | - | - |
| Itaituba | -0.0524ns | 0.0455* | 0.0069* | -4.97E-04* | 0.6429 | - | - | - |
| Marabá | -0.2020* | 0.1112* | -0.0037* | 2.46E-06ns | 0.6053 | - | - | - |
| Monte Alegre | -0.0393ns | 0.0371ns | 0.0149* | -0.0012* | 0.482 | - | - | - |
| Óbidos | -0.1465ns | 0.0582* | 0.0026ns | -2.33E-04* | 0.6204 | - | - | - |
| Soure | -0.0014ns | 0.0231ns | 0.0008ns | -4.28E-03* | 0.3217 | - | - | - |
| Tucuruí | -0.2351* | 0.1734* | -0.0142* | 4.58E-04* | 0.2893 | -0.220 | 2.90 | 0.7284 |
| Boa Vista | 0.0383ns | 0.0150ns | 0.0081* | -4.45E-04* | 0.6191 | - | - | - |

Table 50. Coefficients of the model 43 Group II adjusted for the 20 weather stations (p-value 0.01*, 0.05** and not significantns).

| Weather Station | Coefficients | | | | | Statistical indices | | |
| --- | --- | --- | --- | --- | --- | --- | --- | --- |
| a | b | c | d | R^2 | MBE | RMSE | d |
| Rio Branco | 0.0728ns | -0.0434ns | 0.0310* | -0.0013* | 0.6228 | - | - | - |
| Macapá | 1.55* | -1.30* | 0.1923* | -0.0090* | 0.6626 | 0.082 | 3.11 | 0.8891 |
| Barcelos | -0.3057* | 0.2013* | 0.0123* | -0.0006* | 0.6438 | -0.018 | 3.18 | 0.8897 |
| Eirunepé | -0.0549ns | 0.0441ns | 0.0207* | -0.0008* | 0.6505 | - | - | - |
| Itacoatiara | 0.4887* | -0.3960* | 0.0800* | -0.0038* | 0.6191 | 0.059 | 3.22 | 0.8701 |
| Lábrea | 0.0109ns | 0.0073ns | 0.0256* | -0.0011* | 0.5801 | - | - | - |
| Manaus | 0.1096ns | -0.1361ns | 0.0537* | -0.0026* | 0.4868 | - | - | - |
| Parintins | 0.3977* | -0.3953* | 0.1005* | -0.0054* | 0.6019 | 0.222 | 3.94 | 0.8208 |
| S. G. da Cachoeira | 0.0099ns | 0.0321ns | 0.0204* | -0.0008* | 0.7845 | - | - | - |
| Sinop | -0.1072ns | 0.1252* | 0.0122* | -0.0005* | 0.4627 | - | - | - |
| Belém | 0.9611* | -0.7301* | 0.0967* | -0.0039* | 0.3477 | -0.055 | 2.97 | 0.7293 |
| Cametá | -1.66* | 1.11* | -0.0473* | 0.0008* | 0.3325 | -0.178 | 3.13 | 0.6975 |
| Conceição do Araguaia | -0.3142* | 0.2334* | 0.0052* | -0.0003* | 0.5838 | 0.039 | 2.89 | 0.8589 |
| Itaituba | 0.2635* | -0.2302* | 0.0617* | -0.0028* | 0.6448 | -0.039 | 2.81 | 0.8903 |
| Marabá | -0.3294* | 0.2207* | 0.0124* | -0.0007* | 0.6044 | -0.036 | 2.49 | 0.8590 |
| Monte Alegre | 0.6644* | -0.5720* | 0.1194* | -0.0063* | 0.4838 | -0.100 | 3.10 | 0.8025 |
| Óbidos | 0.1074ns | -0.1327ns | 0.0418* | -0.0017* | 0.6216 | - | - | - |
| Soure | 0.0178ns | -0.3217ns | 0.0328* | -0.0038ns | 0.3218 | - | - | - |
| Tucuruí | -0.7784* | 0.6222* | -0.0291ns | 0.0008ns | 0.2890 | - | - | - |
| Boa Vista | 0.3942* | -0.2844* | 0.0560* | -0.0022* | 0.6195 | 0.070 | 2.75 | 0.8789 |

Table 51. Coefficients of the model 44 Group II adjusted for the 20 weather stations (p-value 0.01*, 0.05** and not significantns).

| Weather Station | Coefficients | | | | | Statistical indices | | |
| --- | --- | --- | --- | --- | --- | --- | --- | --- |
| a | b | c | d | R^2 | MBE | RMSE | d |
| Rio Branco | 8.40* | -0.4610* | -14.89* | 7.34* | 0.6252 | -0.093 | 2.86 | 0.8890 |
| Macapá | 27.54* | -1.62* | -48.83* | 24.10* | 0.659 | 0.112 | 3.16 | 0.8834 |
| Barcelos | 8.22* | -0.4523* | -14.67* | 7.24* | 0.6525 | -0.013 | 3.14 | 0.8929 |
| Eirunepé | 5.88* | -0.3164* | -10.47* | 5.17* | 0.652 | -0.059 | 2.49 | 0.8937 |
| Itacoatiara | 14.83* | -0.8959* | -26.55* | 13.25* | 0.6192 | 0.059 | 3.22 | 0.8695 |
| Lábrea | 13.36* | -0.6286* | -22.36* | 10.49* | 0.5828 | 0.181 | 2.64 | 0.8257 |
| Manaus | 17.22* | -1.00* | -30.54* | 15.07* | 0.4915 | 0.094 | 3.69 | 0.8160 |
| Parintins | 16.09* | -1.11* | -29.97* | 15.50* | 0.6009 | 0.284 | 3.54 | 0.8497 |
| S. G. da Cachoeira | 1.48* | -0.0829* | -2.92* | 1.59* | 0.7831 | -0.042 | 2.41 | 0.9257 |
| Sinop | 9.05* | -0.4192* | -15.18* | 7.16* | 0.4816 | -0.022 | 3.08 | 0.8253 |
| Belém | 18.34* | -0.9442* | -31.42* | 15.00* | 0.3453 | -0.050 | 2.97 | 0.7262 |
| Cametá | 1.62ns | -0.3651* | -5.59ns | 3.98* | 0.3315 | - | - | - |
| Conceição do Araguaia | 4.53* | -0.2511* | -8.23* | 4.14* | 0.5885 | 0.025 | 2.88 | 0.8616 |
| Itaituba | 14.93* | -0.8699* | -26.59* | 13.17* | 0.6484 | -0.041 | 2.79 | 0.8928 |
| Marabá | 8.08* | -0.4512* | -14.42* | 7.15* | 0.6059 | -0.038 | 2.48 | 0.8620 |
| Monte Alegre | 32.97* | -1.99* | -58.35* | 28.90* | 0.4879 | -0.084 | 3.07 | 0.8041 |
| Óbidos | 15.01* | -0.7476* | -25.69* | 12.21* | 0.6269 | 0.026 | 2.72 | 0.8848 |
| Soure | 7.56** | -2.69ns | -32.48ns | 8.98* | 0.3211 | - | - | - |
| Tucuruí | -3.41ns | 0.0662ns | 4.61ns | -1.55ns | 0.2888 | - | - | - |
| Boa Vista | 13.16* | -0.6799* | -22.75* | 10.96* | 0.6187 | 0.058 | 2.75 | 0.8794 |

Table 52. Coefficients of the model 45 Group II adjusted for the 20 weather stations (p-value 0.01*, 0.05** and not significantns).

| Weather Station | Coefficients | | | | | | Statistical indices | | |
| --- | --- | --- | --- | --- | --- | --- | --- | --- | --- |
| a | b | c | d | e | R^2 | MBE | RMSE | d |
| Rio Branco | 7.10* | -0.4130* | -13.02* | 6.47* | 0.3146* | 0.6513 | -0.040 | 2.78 | 0.8926 |
| Macapá | 18.05* | -1.06* | -32.94* | 16.11* | 1.08* | 0.7264 | 0.153 | 2.69 | 0.9166 |
| Barcelos | 6.68* | -0.3971* | -13.03* | 6.39* | 1.04* | 0.7197 | 0.017 | 2.75 | 0.9185 |
| Eirunepé | 4.56* | -0.2595* | -8.59* | 4.26* | 0.4144* | 0.6825 | -0.017 | 2.42 | 0.8969 |
| Itacoatiara | 12.48* | -0.7875* | -23.28* | 11.62* | 0.7932* | 0.7007 | 0.101 | 2.87 | 0.8989 |
| Lábrea | 10.72* | -0.5403* | -18.54* | 8.83* | 0.3082* | 0.6095 | 0.212 | 2.55 | 0.8278 |
| Manaus | 14.57* | -0.8666* | -26.66* | 13.08* | 0.8747* | 0.6124 | 0.134 | 3.17 | 0.8672 |
| Parintins | 13.14* | -0.9469* | -25.69* | 13.19* | 1.17* | 0.7341 | 0.304 | 2.96 | 0.8983 |
| S. G. da Cachoeira | 1.52* | -0.0997* | -3.45* | 1.84* | 0.4104* | 0.8000 | -0.059 | 2.28 | 0.9342 |
| Sinop | 7.33* | -0.3692* | -12.76* | 6.12* | 0.2696* | 0.4998 | 0.011 | 3.02 | 0.8220 |
| Belém | 13.04* | -0.6702* | -22.98* | 10.87* | 0.8086* | 0.4661 | -0.018 | 2.67 | 0.7835 |
| Cametá | 2.79ns | -0.3656* | -7.70ns | 4.57* | 0.9133* | 0.5068 | - | - | - |
| Conceição do Araguaia | 2.93* | -0.2000* | -6.02* | 3.16* | 0.3889* | 0.629 | 0.086 | 2.70 | 0.8751 |
| Itaituba | 13.70* | -0.8282* | -25.04* | 12.42* | 0.5538* | 0.6981 | 0.002 | 2.54 | 0.9103 |
| Marabá | 5.06* | -0.3339* | -9.95* | 5.10* | 0.4996* | 0.6639 | 0.017 | 2.32 | 0.8740 |
| Monte Alegre | 27.61* | -1.71* | -50.07* | 24.76* | 1.09* | 0.6741 | -0.030 | 2.49 | 0.8771 |
| Óbidos | 13.64* | -0.6925* | -23.86* | 11.31* | 0.5745* | 0.6767 | 0.074 | 2.50 | 0.9004 |
| Soure | -33.41* | 1.81* | 55.84* | -26.79* | 1.72* | 0.3738 | -0.001 | 3.35 | 0.7044 |
| Tucuruí | -1.10ns | -0.0433ns | 0.2451ns | 0.3368ns | 0.7507* | 0.4570 | - | - | - |
| Boa Vista | 11.07* | -0.5971* | -20.36* | 9.72* | 1.17* | 0.7435 | 0.070 | 2.28 | 0.9206 |

**GROUP III**

Table 53. Coefficients of the model 46 Group III adjusted for the 20 weather stations (p-value 0.01*, 0.05** and not significantns).

| Weather Station | Coefficients | | | Statistical indices | | |
| --- | --- | --- | --- | --- | --- | --- |
| a | b | R^2 | MBE | RMSE | d |
| Rio Branco | 30.21* | -0.1654* | 0.1864 | 0.177 | 4.27 | 0.5409 |
| Macapá | 70.90* | -0.6663* | 0.6484 | 0.070 | 3.00 | 0.8962 |
| Barcelos | 64.68* | -0.5657* | 0.4463 | 0.150 | 3.83 | 0.7900 |
| Eirunepé | 30.89** | -1.23ns | 0.1978 | - | - | - |
| Itacoatiara | 59.17* | -0.5408* | 0.4838 | 0.011 | 3.79 | 0.7889 |
| Lábrea | 49.02* | -0.4041* | 0.3796 | -0.022 | 2.94 | 0.7469 |
| Manaus | 41.28* | -0.3284* | 0.3615 | 0.093 | 4.02 | 0.7213 |
| Parintins | 66.95* | -0.6090* | 0.5617 | 0.122 | 3.42 | 0.8556 |
| S. G. da Cachoeira | 55.89* | -0.0897ns | 0.3218 | - | - | - |
| Sinop | 12.78ns | -0.0789ns | 0.4218 | - | - | - |
| Belém | 44.52* | -0.3751* | 0.3671 | -0.036 | 2.88 | 0.7281 |
| Cametá | 47.62* | -0.3697* | 0.3599 | -0.090 | 3.05 | 0.7048 |
| Conceição do Araguaia | 32.15* | -0.1909* | 0.273 | 0.130 | 3.69 | 0.6613 |
| Itaituba | 44.94* | -0.3495* | 0.2896 | 0.026 | 4.07 | 0.6497 |
| Marabá | 40.38* | -0.2894* | 0.3332 | -0.042 | 3.23 | 0.6746 |
| Monte Alegre | 50.69* | -0.4089* | 0.4587 | -0.014 | 3.24 | 0.7621 |
| Óbidos | 47.22* | -0.3911* | 0.5621 | -0.035 | 2.79 | 0.8620 |
| Soure | 59.35* | -0.5134* | 0.5144 | -0.007 | 2.91 | 0.8288 |
| Tucuruí | 36.29* | -0.2470* | 0.2958 | -0.102 | 2.93 | 0.6726 |
| Boa Vista | 37.25* | -0.2604* | 0.3728 | 0.152 | 3.48 | 0.7240 |

Table 54. Coefficients of the model 47 Group III adjusted for the 20 weather stations (p-value 0.01*, 0.05** and not significantns).

| Weather Station | Coefficients | | | Statistical indices | | |
| --- | --- | --- | --- | --- | --- | --- |
| a | b | R^2 | MBE | RMSE | d |
| Rio Branco | 25.31* | -0.1913* | 0.2197 | 0.174 | 4.19 | 0.5803 |
| Macapá | 45.03* | -0.6217* | 0.602 | 0.067 | 3.22 | 0.8759 |
| Barcelos | 42.92* | -0.5365* | 0.434 | 0.155 | 3.88 | 0.7813 |
| Eirunepé | 33.28* | -0.0789ns | 0.2178 | - | - | - |
| Itacoatiara | 37.25* | -0.4853* | 0.4418 | 0.013 | 3.94 | 0.7601 |
| Lábrea | 36.12* | -0.4402* | 0.4414 | -0.014 | 2.73 | 0.8010 |
| Manaus | 28.78* | -0.3105* | 0.3387 | 0.095 | 4.09 | 0.7047 |
| Parintins | 41.55* | -0.5304* | 0.498 | 0.132 | 3.63 | 0.8283 |
| S. G. da Cachoeira | 12.89ns | -0.1158ns | 0.2178 | - | - | - |
| Sinop | 10.78ns | -0.0897ns | 0.3389 | - | - | - |
| Belém | 29.88* | -0.3486* | 0.3226 | -0.036 | 2.97 | 0.6965 |
| Cametá | 33.52* | -0.3482* | 0.3481 | -0.092 | 3.07 | 0.6939 |
| Conceição do Araguaia | 25.78* | -0.2043* | 0.2737 | 0.129 | 3.70 | 0.6566 |
| Itaituba | 31.18* | -0.3197* | 0.2653 | 0.028 | 4.18 | 0.6146 |
| Marabá | 29.51* | -0.2769* | 0.2893 | -0.043 | 3.33 | 0.6343 |
| Monte Alegre | 34.44* | -0.3697* | 0.4206 | -0.018 | 3.32 | 0.7358 |
| Óbidos | 31.12* | -0.3449* | 0.5192 | -0.031 | 2.95 | 0.8402 |
| Soure | 39.76* | -0.4861* | 0.4886 | -0.008 | 3.01 | 0.8112 |
| Tucuruí | 27.48* | -0.2494* | 0.3031 | -0.101 | 2.91 | 0.6799 |
| Boa Vista | 26.88* | -0.2297* | 0.3611 | 0.161 | 3.52 | 0.7144 |

Table 55. Coefficients of the model 48 Group III adjusted for the 20 weather stations (p-value 0.01*, 0.05** and not significantns).

| Weather Station | Coefficients | | | Statistical indices | | |
| --- | --- | --- | --- | --- | --- | --- |
| a | b | R^2 | MBE | RMSE | d |
| Rio Branco | 1.00* | -0.0066* | 0.2519 | 0.122 | 4.11 | 0.6461 |
| Macapá | 1.93* | -0.0181* | 0.6183 | 0.033 | 3.14 | 0.8872 |
| Barcelos | 1.77* | -0.0154* | 0.4398 | 0.132 | 3.85 | 0.7904 |
| Eirunepé | 1.08* | -0.8974ns | 0.2178 | - | - | - |
| Itacoatiara | 1.61* | -0.0146* | 0.4557 | -0.039 | 3.90 | 0.7803 |
| Lábrea | 1.53* | -0.0134* | 0.4599 | -0.030 | 2.69 | 0.8198 |
| Manaus | 1.14* | -0.0091* | 0.3212 | 0.038 | 4.13 | 0.7144 |
| Parintins | 1.78* | -0.0160* | 0.51 | 0.069 | 3.60 | 0.8430 |
| S. G. da Cachoeira | 0.8210ns | -0.8792ns | 0.1978 | - | - | - |
| Sinop | 2.89* | -1.07ns | 0.2178 | - | - | - |
| Belém | 1.25* | -0.0106* | 0.3108 | -0.073 | 2.98 | 0.7144 |
| Cametá | 1.31* | -0.0101* | 0.3203 | -0.130 | 3.15 | 0.7023 |
| Conceição do Araguaia | 1.00* | -0.0068* | 0.2067 | 0.020 | 3.89 | 0.6682 |
| Itaituba | 1.24* | -0.0097* | 0.233 | -0.044 | 4.27 | 0.6338 |
| Marabá | 1.22* | -0.0093* | 0.2255 | -0.128 | 3.51 | 0.6520 |
| Monte Alegre | 1.36* | -0.0107* | 0.3888 | -0.069 | 3.42 | 0.7399 |
| Óbidos | 1.23* | -0.0099* | 0.4963 | -0.094 | 3.01 | 0.8439 |
| Soure | 1.64* | -0.0141* | 0.4892 | -0.034 | 3.01 | 0.8209 |
| Tucuruí | 1.03* | -0.0072* | 0.2739 | -0.132 | 2.96 | 0.6878 |
| Boa Vista | 0.9219* | -0.0056* | 0.3264 | 0.132 | 3.62 | 0.7069 |

Table 56. Coefficients of the model 49 Group III adjusted for the 20 weather stations (p-value 0.01*, 0.05** and not significantns).

| Weather Station | Coefficients | | | Statistical indices | | |
| --- | --- | --- | --- | --- | --- | --- |
| a | b | R^2 | MBE | RMSE | d |
| Rio Branco | 1.28* | -0.0919* | 0.1826 | 0.116 | 4.30 | 0.5731 |
| Macapá | 3.33* | -0.3181* | 0.6117 | 0.034 | 3.17 | 0.8844 |
| Barcelos | 2.96* | -0.2719* | 0.4222 | 0.137 | 3.91 | 0.7779 |
| Eirunepé | 1.12* | -0.0789ns | 0.2378 | - | - | - |
| Itacoatiara | 2.72* | -0.2554* | 0.4446 | -0.037 | 3.94 | 0.7731 |
| Lábrea | 2.54* | -0.2324* | 0.4457 | -0.028 | 2.73 | 0.8122 |
| Manaus | 1.77* | -0.1521* | 0.3071 | 0.037 | 4.18 | 0.7025 |
| Parintins | 2.97* | -0.2767* | 0.4920 | 0.071 | 3.66 | 0.8339 |
| S. G. da Cachoeira | 1.36ns | -1.25ns | 0.5687 | - | - | - |
| Sinop | 0.9214ns | -0.8478ns | 0.2369 | - | - | - |
| Belém | 2.07* | -0.1872* | 0.3072 | -0.073 | 2.99 | 0.7118 |
| Cametá | 2.04* | -0.1725* | 0.3105 | -0.133 | 3.17 | 0.6949 |
| Conceição do Araguaia | 1.40* | -0.1050* | 0.1705 | 0.017 | 3.99 | 0.6363 |
| Itaituba | 1.93* | -0.1642* | 0.223 | -0.044 | 4.30 | 0.6238 |
| Marabá | 1.89* | -0.1590* | 0.2124 | -0.131 | 3.53 | 0.6426 |
| Monte Alegre | 2.11* | -0.1803* | 0.3738 | -0.069 | 3.46 | 0.7300 |
| Óbidos | 1.95* | -0.1697* | 0.4790 | -0.097 | 3.06 | 0.8351 |
| Soure | 2.72* | -0.2478* | 0.4807 | -0.035 | 3.03 | 0.8166 |
| Tucuruí | 1.57* | -0.1251* | 0.2688 | -0.132 | 2.97 | 0.6822 |
| Boa Vista | 1.28* | -0.0901* | 0.3171 | 0.134 | 3.65 | 0.6974 |

**GROUP IV**

Table 57. Coefficients of the model 50 Group IV adjusted for the 20 weather stations (p-value 0.01*, 0.05** and not significantns).

| Weather Station | Coefficients | | | Statistical indices | | |
| --- | --- | --- | --- | --- | --- | --- |
| a | b | R^2 | MBE | RMSE | d |
| Rio Branco | 17.22* | -0.0077ns | 0.1578 | - | - | - |
| Macapá | 19.88* | -0.0002ns | 0.1147 | - | - | - |
| Barcelos | 17.25ns | -0.0250ns | 0.1236 | - | - | - |
| Eirunepé | 15.71ns | 0.0064ns | 0.0989 | - | - | - |
| Itacoatiara | 16.14ns | 0.0044ns | 0.1236 | - | - | - |
| Lábrea | 17.15ns | -0.0100ns | 0.2147 | - | - | - |
| Manaus | 16.36ns | 0.0160ns | 0.0895 | - | - | - |
| Parintins | 17.59ns | -0.0033ns | 0.1789 | - | - | - |
| S. G. da Cachoeira | 15.28ns | -0.0317ns | 0.1124 | - | - | - |
| Sinop | 19.21ns | 0.0056ns | 0.1378 | - | - | - |
| Belém | 15.09ns | 0.0157ns | 0.1201 | - | - | - |
| Cametá | 20.12ns | -0.0029ns | 0.0894 | - | - | - |
| Conceição do Araguaia | 18.69ns | 0.0385ns | 0.07894 | - | - | - |
| Itaituba | 18.77ns | 0.0093** | 0.1236 | - | - | - |
| Marabá | 18.20ns | 0.0460ns | 0.1125 | - | - | - |
| Monte Alegre | 20.60ns | 0.0077ns | 0.0897 | - | - | - |
| Óbidos | 16.59ns | -0.0258ns | 0.0987 | - | - | - |
| Soure | 19.83ns | -0.0157ns | 0.0879 | - | - | - |
| Tucuruí | 16.91ns | 0.0052ns | 0.1324 | - | - | - |
| Boa Vista | 19.43ns | -0.0613ns | 0.1124 | - | - | - |

Table 58. Coefficients of the model 51 Group IV adjusted for the 20 weather stations (p-value 0.01*, 0.05** and not significantns).

| Weather Station | Coefficients | | | Statistical indices | | |
| --- | --- | --- | --- | --- | --- | --- |
| a | b | R^2 | MBE | RMSE | d |
| Rio Branco | 17.24 | -0.1270 | 0.0892 | - | - | - |
| Macapá | 19.88 | 0.1247 | 0.0752 | - | - | - |
| Barcelos | 17.25 | 0.1535 | 0.0956 | - | - | - |
| Eirunepé | 15.70 | -0.2611 | 0.0867 | - | - | - |
| Itacoatiara | 16.14 | -0.3074 | 0.0796 | - | - | - |
| Lábrea | 17.15 | -0.1442 | 0.1120 | - | - | - |
| Manaus | 16.38 | -0.2282 | 0.1062 | - | - | - |
| Parintins | 17.58 | -0.1601 | 0.0972 | - | - | - |
| S. G. da Cachoeira | 15.34 | 0.0776 | 0.0875 | - | - | - |
| Sinop | 19.20 | -0.2240 | 0.1201 | - | - | - |
| Belém | 15.08 | -0.1613 | 0.0761 | - | - | - |
| Cametá | 20.12 | -0.0732 | 0.0879 | - | - | - |
| Conceição do Araguaia | 18.69 | -0.1605 | 0.0972 | - | - | - |
| Itaituba | 18.76 | -0.1621 | 0.0843 | - | - | - |
| Marabá | 18.23 | -0.3015 | 0.0786 | - | - | - |
| Monte Alegre | 20.60 | -0.0555 | 0.0872 | - | - | - |
| Óbidos | 16.63 | 0.2030 | 0.1021 | - | - | - |
| Soure | 19.81 | 0.0625 | 0.0872 | - | - | - |
| Tucuruí | 16.91 | -0.2638 | 0.0932 | - | - | - |
| Boa Vista | 19.43 | 0.0988 | 0.1014 | - | - | - |

Table 59. Coefficients of the model 52 Group IV adjusted for the 20 weather stations (p-value 0.01*, 0.05** and not significantns).

| Weather Station | Coefficients | | | Statistical indices | | |
| --- | --- | --- | --- | --- | --- | --- |
| a | b | R^2 | MBE | RMSE | d |
| Rio Branco | 0.0426ns | 15.70ns | 0.0789 | - | - | - |
| Macapá | -0.0751ns | 22.59ns | 0.0854 | - | - | - |
| Barcelos | 0.2972ns | 6.56ns | 0.0954 | - | - | - |
| Eirunepé | 0.0517ns | 13.82ns | 0.0894 | - | - | - |
| Itacoatiara | 0.1040ns | 12.39ns | 0.1032 | - | - | - |
| Lábrea | 0.1087ns | 13.26ns | 0.0897 | - | - | - |
| Manaus | -0.0605ns | 18.56ns | 0.0947 | - | - | - |
| Parintins | 0.1455ns | 12.36ns | 0.1011 | - | - | - |
| S. G. da Cachoeira | 0.7456ns | -11.63ns | 0.0964 | - | - | - |
| Sinop | -0.0113ns | 19.60ns | 0.0876 | - | - | - |
| Belém | -0.2780ns | 25.11ns | 0.0942 | - | - | - |
| Cametá | 0.1175ns | 15.90ns | 0.0874 | - | - | - |
| Conceição do Araguaia | -0.1681ns | 24.71ns | 0.0876 | - | - | - |
| Itaituba | 0.0054ns | 18.57ns | 0.0963 | - | - | - |
| Marabá | -0.2435ns | 26.95ns | 0.0942 | - | - | - |
| Monte Alegre | 0.0958ns | 17.13ns | 0.0876 | - | - | - |
| Óbidos | 0.2628ns | 7.11ns | 0.0965 | - | - | - |
| Soure | 0.0331ns | 18.62ns | 0.0876 | - | - | - |
| Tucuruí | 0.0528ns | 15.01ns | 0.0862 | - | - | - |
| Boa Vista | 0.8422ns | -10.89ns | 0.0942 | - | - | - |

Table 60. Coefficients of the model 53 Group IV adjusted for the 20 weather stations (p-value 0.01*, 0.05** and not significantns).

| Weather Station | Coefficients | | | | | Statistical indices | | |
| --- | --- | --- | --- | --- | --- | --- | --- | --- |
| a | b | c | d | R^2 | MBE | RMSE | d |
| Rio Branco | 17.26* | 0.4210ns | -10.57ns | 10.77ns | 0.0755 | - | - | - |
| Macapá | 15.31* | -7.08ns | 10.08ns | -9.88ns | 0.0764 | - | - | - |
| Barcelos | 17.30* | -0.0358* | -9.82ns | 10.03ns | 0.0879 | - | - | - |
| Eirunepé | 15.70* | -0.3828ns | -10.69ns | 10.89ns | 0.0921 | - | - | - |
| Itacoatiara | 16.13* | -0.3964ns | -10.31ns | 10.51ns | 0.0852 | - | - | - |
| Lábrea | 17.19ns | 0.5421ns | -7.95ns | 8.15ns | 0.0854 | - | - | - |
| Manaus | 16.40ns | 0.3241* | -9.72ns | 9.92ns | 0.0962 | - | - | - |
| Parintins | 17.58ns | -0.4678ns | 10.14ns | -9.94ns | 0.0891 | - | - | - |
| S. G. da Cachoeira | 15.37ns | 0.8166ns | -9.90ns | 10.10ns | 0.0871 | - | - | - |
| Sinop | 19.20ns | -0.0959ns | 9.96ns | -9.76ns | 0.0798 | - | - | - |
| Belém | 15.11* | 0.3642* | 9.84ns | -9.64ns | 0.0921 | - | - | - |
| Cametá | 20.14ns | 0.3927ns | 10.18ns | -9.98ns | 0.1003 | - | - | - |
| Conceição do Araguaia | 18.72ns | 0.3551ns | 9.56ns | -9.35ns | 0.0973 | - | - | - |
| Itaituba | 18.81ns | 0.4848* | -9.89ns | 10.09ns | 0.0876 | - | - | - |
| Marabá | 18.23ns | 0.0978ns | -9.90ns | 10.10ns | 0.0921 | - | - | - |
| Monte Alegre | 20.60* | -0.0732* | -9.90ns | 10.10ns | 0.0871 | - | - | - |
| Óbidos | 16.63ns | 0.3960ns | -9.94ns | 10.14ns | 0.0732 | - | - | - |
| Soure | 19.82ns | 0.4741* | -11.12ns | 11.32ns | 0.0821 | - | - | - |
| Tucuruí | 16.97ns | 0.6642* | 9.81ns | -9.61ns | 0.0932 | - | - | - |
| Boa Vista | 18.96ns | 1.29* | 10.10ns | -9.90ns | 0.0863 | - | - | - |

Table 61. Coefficients of the model 54 Group IV adjusted for the 20 weather stations (p-value 0.01*, 0.05** and not significantns).

| Weather Station | Coefficients | | | | | | Statistical indices | | |
| --- | --- | --- | --- | --- | --- | --- | --- | --- | --- |
| a | b | c | d | e | R^2 | MBE | RMSE | d |
| Rio Branco | 16.91* | -0.0348ns | 1.78E-04ns | 4.41E-07ns | -1.89E-09ns | 0.0821 | - | - | - |
| Macapá | 18.91ns | -0.1177ns | 1.02E-03ns | -1.75E-06ns | -4.95E-10ns | 0.1328 | - | - | - |
| Barcelos | 17.94ns | -0.0464ns | 1.94E-04ns | 5.63E-07ns | -2.16E-09ns | 0.0599 | - | - | - |
| Eirunepé | 14.53ns | 0.0406ns | -6.45E-04ns | 3.54E-06ns | -5.79E-09ns | 0.0506 | - | - | - |
| Itacoatiara | 15.54* | -0.0281ns | 2.98E-05ns | 1.57E-06ns | -4.15E-09ns | 0.1358 | - | - | - |
| Lábrea | 16.56ns | -0.0026ns | -1.56E-04ns | 1.51E-06ns | -2.97E-09ns | 0.0548 | - | - | - |
| Manaus | 15.77ns | -0.0424ns | 3.32E-04ns | -8.26E-08ns | -1.55E-09ns | 0.1029 | - | - | - |
| Parintins | 16.69ns | -0.0246ns | -1.18E-04ns | 2.75E-06ns | -6.35E-09ns | 0.1208 | - | - | - |
| S. G. da Cachoeira | 14.95* | 0.0468ns | -9.31E-04ns | 4.99E-06ns | -7.79E-09ns | 0.0474 | - | - | - |
| Sinop | 18.29ns | 0.0083ns | -7.86E-05ns | 5.52E-07ns | -1.09E-09ns | 0.0157 | - | - | - |
| Belém | 14.69ns | -0.0776ns | 8.29E-04ns | -2.33E-06ns | 1.71E-09ns | 0.1378 | - | - | - |
| Cametá | 17.49* | 0.0309ns | -4.53E-04ns | 2.93E-06ns | -5.24E-09ns | 0.1948 | - | - | - |
| Conceição do Araguaia | 19.62ns | -0.0827ns | 9.30E-04ns | -3.15E-06ns | 3.16E-09ns | 0.0639 | - | - | - |
| Itaituba | 17.66ns | -0.0111ns | -1.93E-05ns | 1.24E-06ns | -3.10E-09ns | 0.1021 | - | - | - |
| Marabá | 17.16* | -0.0307ns | 4.85E-04ns | -1.60E-06ns | 1.31E-09ns | 0.1014 | - | - | - |
| Monte Alegre | 19.50ns | -0.0129ns | -8.11E-05ns | 1.83E-06ns | -4.28E-09ns | 0.182 | - | - | - |
| Óbidos | 15.41* | -0.0525ns | 1.87E-04ns | 1.38E-06ns | -4.21E-09ns | 0.1358 | - | - | - |
| Soure | 18.72ns | -0.0448ns | 2.45E-04ns | 7.01E-07ns | -2.85E-09ns | 0.1653 | - | - | - |
| Tucuruí | 15.58* | 0.0359ns | -5.06E-04ns | 2.74E-06ns | -4.50E-09ns | 0.0602 | - | - | - |
| Boa Vista | 18.59ns | 0.1038ns | -1.80E-03ns | 9.03E-06ns | -1.35E-08ns | 0.1313 | - | - | - |

**GROUP V**

Table 62. Coefficients of the model 55 Group V adjusted for the 20 weather stations (p-value 0.01*, 0.05** and not significantns).

| Weather Station | Coefficients | | | Statistical indices | | |
| --- | --- | --- | --- | --- | --- | --- |
| a | b | R^2 | MBE | RMSE | d |
| Rio Branco | -0.2695* | 0.4679* | 0.7568 | 0.088 | 2.43 | 0.9229 |
| Macapá | 0.2558* | 0.5091* | 0.8839 | 0.051 | 1.79 | 0.9687 |
| Barcelos | 0.5172* | 0.4773* | 0.7657 | 0.046 | 2.53 | 0.9299 |
| Eirunepé | 0.3047* | 0.4525* | 0.7143 | 0.127 | 2.14 | 0.9194 |
| Itacoatiara | -0.2280* | 0.4582* | 0.8062 | 0.037 | 2.27 | 0.9423 |
| Lábrea | 0.5570* | 0.3819* | 0.7420 | 0.077 | 2.04 | 0.9082 |
| Manaus | -0.2415* | 0.4676* | 0.7750 | 0.089 | 2.30 | 0.9402 |
| Parintins | -0.2695* | 0.4945* | 0.8710 | -0.006 | 2.00 | 0.9608 |
| S. G. da Cachoeira | 0.2353* | 0.4756* | 0.7527 | 0.067 | 2.38 | 0.9262 |
| Sinop | 0.3996* | 0.4137* | 0.6331 | 0.080 | 2.62 | 0.8737 |
| Belém | 1.38* | 0.3672* | 0.6563 | -0.091 | 2.15 | 0.8885 |
| Cametá | -0.4552* | 0.4493* | 0.8332 | 0.016 | 1.61 | 0.9464 |
| Conceição do Araguaia | -0.6734* | 0.4574* | 0.8032 | -0.068 | 1.96 | 0.9440 |
| Itaituba | -0.6601* | 0.4627* | 0.8573 | 0.104 | 1.73 | 0.9634 |
| Marabá | 0.4847* | 0.4134* | 0.7843 | -0.079 | 1.82 | 0.9347 |
| Monte Alegre | -0.6562* | 0.4752* | 0.8886 | 0.022 | 1.34 | 0.9723 |
| Óbidos | -0.7625* | 0.4080* | 0.7864 | -0.065 | 2.03 | 0.9398 |
| Soure | 0.4492* | 0.3707* | 0.8176 | -0.117 | 1.89 | 0.9447 |
| Tucuruí | -0.3695* | 0.3542* | 0.6856 | -0.060 | 2.00 | 0.8932 |
| Boa Vista | -0.3183* | 0.4346* | 0.8339 | 0.052 | 1.81 | 0.9517 |

Table 63. Coefficients of the model 56 Group V adjusted for the 20 weather stations (p-value 0.01*, 0.05** and not significantns).

| Weather Station | Coefficients | | | Statistical indices | | |
| --- | --- | --- | --- | --- | --- | --- |
| a | b | R^2 | MBE | RMSE | d |
| Rio Branco | 1.02* | 0.0098* | 0.1902 | 0.151 | 4.30 | 0.5540 |
| Macapá | 5.98* | 0.0317* | 0.5988 | 0.068 | 3.24 | 0.8737 |
| Barcelos | 3.73* | 0.0247* | 0.3858 | 0.204 | 4.09 | 0.7276 |
| Eirunepé | 1.56ns | 0.0789ns | 0.2369 | - | - | - |
| Itacoatiara | 3.90* | 0.0276* | 0.4222 | 0.016 | 4.02 | 0.7453 |
| Lábrea | 3.08* | 0.0238* | 0.4253 | -0.002 | 2.78 | 0.7914 |
| Manaus | 1.64* | 0.0172* | 0.299 | 0.067 | 4.21 | 0.6816 |
| Parintins | 3.71* | 0.0253* | 0.4542 | 0.140 | 3.81 | 0.8003 |
| S. G. da Cachoeira | 1.03* | 0.1265ns | 0.2314 | - | - | - |
| Sinop | 1.21ns | 0.2157ns | 0.2147 | - | - | - |
| Belém | 2.82* | 0.0246* | 0.3177 | -0.066 | 2.97 | 0.7140 |
| Cametá | 1.95* | 0.0170* | 0.3155 | -0.125 | 3.15 | 0.6906 |
| Conceição do Araguaia | 1.12* | 0.0110* | 0.1692 | 0.038 | 4.00 | 0.6165 |
| Itaituba | 1.85* | 0.0172* | 0.2308 | -0.025 | 4.28 | 0.6175 |
| Marabá | 1.78* | 0.0166* | 0.2145 | -0.122 | 3.51 | 0.6339 |
| Monte Alegre | 1.96* | 0.0171* | 0.369 | -0.053 | 3.46 | 0.7185 |
| Óbidos | 1.91* | 0.0186* | 0.4592 | -0.066 | 3.13 | 0.8152 |
| Soure | 3.44* | 0.0241* | 0.4761 | -0.025 | 3.04 | 0.8087 |
| Tucuruí | 1.45* | 0.0146* | 0.2790 | -0.124 | 2.95 | 0.6829 |
| Boa Vista | 1.05* | 0.0100* | 0.3262 | 0.141 | 3.62 | 0.6995 |

Table 64. Coefficients of the model 57 Group V adjusted for the 20 weather stations (p-value 0.01*, 0.05** and not significantns).

| Weather Station | Coefficients | | | | Statistical indices | | |
| --- | --- | --- | --- | --- | --- | --- | --- |
| a | b | c | R^2 | MBE | RMSE | d |
| Rio Branco | 0.3308* | -0.0008* | 0.4479* | 0.7598 | 0.095 | 2.41 | 0.9240 |
| Macapá | 0.5539* | -0.0034* | 0.4462* | 0.8929 | 0.050 | 1.69 | 0.9727 |
| Barcelos | 0.6501* | -0.0040* | 0.4170* | 0.7832 | 0.044 | 2.40 | 0.9386 |
| Eirunepé | 0.3503* | -0.0009* | 0.4477* | 0.7275 | 0.122 | 2.12 | 0.9224 |
| Itacoatiara | 0.3310* | -0.0012* | 0.4379* | 0.8076 | 0.032 | 2.28 | 0.9421 |
| Lábrea | 0.5978* | -0.0033* | 0.3283* | 0.7576 | 0.072 | 1.96 | 0.9172 |
| Manaus | 0.2972* | -0.0007* | 0.4533* | 0.7761 | 0.086 | 2.30 | 0.9404 |
| Parintins | 0.4599* | -0.0025* | 0.4524* | 0.8774 | -0.006 | 1.93 | 0.9637 |
| S. G. da Cachoeira | 0.0662* | 0.0019* | 0.5035* | 0.7641 | 0.084 | 2.33 | 0.9293 |
| Sinop | 0.3587* | -0.0003ns | 0.4024* | 0.6342 | - | - | - |
| Belém | 0.4904* | -0.0031* | 0.3210* | 0.6784 | -0.088 | 2.07 | 0.8989 |
| Cametá | 0.3041* | -0.0003ns | 0.4440* | 0.8334 | - | - | - |
| Conceição do Araguaia | 0.1855* | 0.0008* | 0.4830* | 0.8067 | -0.079 | 1.95 | 0.9446 |
| Itaituba | 0.3291* | -0.0006* | 0.4544* | 0.858 | 0.102 | 1.73 | 0.9635 |
| Marabá | 0.3738* | -0.0009* | 0.3961* | 0.7871 | -0.076 | 1.81 | 0.9350 |
| Monte Alegre | 0.2181* | 0.0006* | 0.4885* | 0.8893 | 0.023 | 1.33 | 0.9726 |
| Óbidos | 0.4499* | -0.0024* | 0.3538* | 0.8014 | -0.073 | 1.94 | 0.9467 |
| Soure | 0.2330* | 0.0012* | 0.3906* | 0.8189 | -0.123 | 1.89 | 0.9446 |
| Tucuruí | 0.4179* | -0.0015* | 0.3264* | 0.6948 | -0.059 | 1.96 | 0.8981 |
| Boa Vista | 0.3674* | -0.0008* | 0.4173* | 0.8376 | 0.043 | 1.79 | 0.9533 |

Table 65. Coefficients of the model 58 Group V adjusted for the 20 weather stations (p-value 0.01*, 0.05** and not significantns).

| Weather Station | Coefficients | | | | Statistical indices | | |
| --- | --- | --- | --- | --- | --- | --- | --- |
| a | b | c | R^2 | MBE | RMSE | d |
| Rio Branco | 0.8760* | -0.0704* | 0.3238* | 0.6310 | -0.244 | 2.67 | 0.9223 |
| Macapá | 6.89* | -0.5331* | 0.3338* | 0.8374 | -0.104 | 1.98 | 0.9656 |
| Barcelos | 4.06* | -0.4150* | 0.2562* | 0.6459 | -0.638 | 3.15 | 0.9230 |
| Eirunepé | 0.7776* | -0.0559* | 0.2550* | 0.4578 | -0.595 | 3.22 | 0.8803 |
| Itacoatiara | 0.8792ns | -0.2387ns | 0.1014ns | 0.2121 | - | - | - |
| Lábrea | 5.29* | -0.5008* | 0.2006* | 0.3632 | -0.276 | 2.99 | 0.8532 |
| Manaus | 0.8101* | -0.0571* | 0.3488* | 0.6508 | -0.394 | 2.97 | 0.9187 |
| Parintins | 2.89* | -0.3382* | 0.3612* | 0.8283 | -0.177 | 2.31 | 0.9543 |
| S. G. da Cachoeira | 1.36** | -0.4589ns | 0.1712ns | 0.1425 | - | - | - |
| Sinop | 0.8786* | -0.0644* | 0.2614* | 0.3639 | -0.327 | 3.18 | 0.8615 |
| Belém | 10.33* | -0.6866* | 0.3070* | 0.5838 | -0.234 | 2.38 | 0.8799 |
| Cametá | 1.03* | -0.0971* | 0.3645* | 0.7764 | -0.074 | 1.77 | 0.9416 |
| Conceição do Araguaia | 0.6237* | 0.0170ns | 0.3736* | 0.7278 | - | - | - |
| Itaituba | 0.9342* | -0.0745* | 0.3265* | 0.7546 | -0.345 | 2.16 | 0.9553 |
| Marabá | 1.33* | -0.1701* | 0.2858* | 0.6041 | -0.451 | 2.59 | 0.9019 |
| Monte Alegre | 0.7186* | -0.0054ns | 0.3866* | 0.8331 | - | - | - |
| Óbidos | 2.63* | -0.3500* | 0.3236* | 0.6844 | -0.399 | 2.60 | 0.9211 |
| Soure | 0.6369* | 0.0083ns | 0.2399* | 0.5762 | - | - | - |
| Tucuruí | 2.45* | -0.3337* | 0.2582* | 0.5598 | -0.265 | 2.32 | 0.8814 |
| Boa Vista | 0.9779* | -0.0879* | 0.3220* | 0.7592 | -0.133 | 2.20 | 0.9384 |

Table 66. Coefficients of the model 59 Group V adjusted for the 20 weather stations (p-value 0.01*, 0.05** and not significantns).

| Weather Station | Coefficients | | | | | Statistical indices | | |
| --- | --- | --- | --- | --- | --- | --- | --- | --- |
| a | b | c | d | R^2 | MBE | RMSE | d |
| Rio Branco | 0.6791* | 0.0765ns | -0.0697* | 0.3204* | 0.6314 | - | - | - |
| Macapá | 1.07ns | 0.3705* | -0.3863* | 0.3303* | 0.8380 | - | - | - |
| Barcelos | 0.1119ns | 0.7173* | -0.1368ns | 0.2462* | 0.6495 | - | - | - |
| Eirunepé | 0.1819* | 0.4238* | -0.0413* | 0.2483* | 0.4637 | -0.627 | 3.86 | 0.8816 |
| Itacoatiara | 1.42ns | 0.0013ns | -0.1935ns | 0.3451* | 0.7030 | - | - | - |
| Lábrea | 0.6371ns | 0.5427* | -0.4267* | 0.1929* | 0.3729 | - | - | - |
| Manaus | 0.0813ns | 0.4814* | 0.1029* | 0.3400* | 0.6524 | - | - | - |
| Parintins | 0.1412ns | 0.5849* | -0.0926ns | 0.3496* | 0.8297 | - | - | - |
| S. G. da Cachoeira | 0.0533ns | 0.2317ns | 0.3877* | 0.3604* | 0.6581 | - | - | - |
| Sinop | 0.7348* | 0.0480ns | -0.0591* | 0.2603* | 0.3641 | - | - | - |
| Belém | 144.60ns | -0.5063* | -0.9082* | 0.3058* | 0.5857 | - | - | - |
| Cametá | 0.3614ns | 0.2127ns | -0.0181ns | 0.3609* | 0.7768 | - | - | - |
| Conceição do Araguaia | 2.35* | -0.3328* | -0.0375* | 0.3752* | 0.7326 | -0.353 | 4.27 | 0.9267 |
| Itaituba | 0.2252* | 0.2961* | 0.0262ns | 0.3193* | 0.7558 | - | - | - |
| Marabá | 2.50* | -0.1508ns | -0.2016* | 0.2867* | 0.6046 | - | - | - |
| Monte Alegre | 2.04ns | -0.2092ns | -0.0867ns | 0.3895* | 0.8334 | - | - | - |
| Óbidos | 0.3982ns | 0.3758ns | -0.2005ns | 0.3200* | 0.6851 | - | - | - |
| Soure | 0.5586ns | 0.0285ns | 0.0166ns | 0.2396* | 0.5762 | - | - | - |
| Tucuruí | 0.3551ns | 0.4167* | -0.2055* | 0.2533* | 0.5618 | - | - | - |
| Boa Vista | 0.0277* | 0.7991* | 0.1234* | 0.3008* | 0.7671 | -0.124 | 4.37 | 0.9413 |

Table 67. Coefficients of the model 60 Group V adjusted for the 20 weather stations (p-value 0.01*, 0.05** and not significantns).

| Weather Station | Coefficients | | | | | | Statistical indices | | |
| --- | --- | --- | --- | --- | --- | --- | --- | --- | --- |
| a | b | c | d | e | R^2 | MBE | RMSE | d |
| Rio Branco | -0.1738* | 0.0207* | -0.0008* | -0.0329* | 1.26* | 0.7819 | 0.052 | 2.31 | 0.9326 |
| Macapá | -0.3447* | 0.0310* | -0.0025* | -0.0491* | 1.77* | 0.9064 | 0.049 | 1.58 | 0.9762 |
| Barcelos | -0.8957* | 0.0534* | -0.0020* | -0.0957* | 2.92* | 0.8374 | 0.006 | 2.07 | 0.9571 |
| Eirunepé | -0.3401* | 0.0261* | -0.0005* | -0.0387* | 1.42* | 0.7734 | 0.135 | 1.91 | 0.9387 |
| Itacoatiara | -0.4143* | 0.0288* | -0.0013* | -0.0550* | 1.91* | 0.8298 | 0.008 | 2.12 | 0.9512 |
| Lábrea | -0.0960ns | 0.0234* | -0.0023* | -0.0277* | 1.05* | 0.781 | - | - | - |
| Manaus | -0.5787* | 0.0311* | -0.0002ns | -0.0560* | 1.99* | 0.8092 | - | - | - |
| Parintins | -0.4274* | 0.0384* | -0.0038* | -0.0656* | 2.18* | 0.9043 | 0.056 | 1.76 | 0.9705 |
| S. G. da Cachoeira | -0.5929* | 0.0229* | 0.0027* | -0.0417* | 1.59* | 0.7772 | 0.056 | 2.23 | 0.9370 |
| Sinop | -0.4543* | 0.0317* | 0.0001ns | -0.0489* | 1.62* | 0.6689 | - | - | - |
| Belém | 0.5522* | -0.0002ns | -0.0038* | -0.0080* | 0.5350* | 0.6792 | - | - | - |
| Cametá | -0.5198* | 0.0304* | -0.0001ns | -0.0457* | 1.67* | 0.8487 | - | - | - |
| Conceição do Araguaia | -0.5168* | 0.0281* | 0.0006* | -0.0448* | 1.64* | 0.8317 | -0.101 | 1.79 | 0.9547 |
| Itaituba | -0.8170* | 0.0409* | 0.0002ns | -0.0666* | 2.25* | 0.9031 | - | - | - |
| Marabá | -0.5911* | 0.0352* | -0.0002ns | -0.0559* | 1.85* | 0.8186 | - | - | - |
| Monte Alegre | -0.3233* | 0.0268* | -0.0014* | -0.0569* | 1.99* | 0.9102 | 0.054 | 1.22 | 0.9773 |
| Óbidos | -0.3114ns | 0.0290* | -0.0022* | -0.0446* | 1.51* | 0.8176 | - | - | - |
| Soure | -0.8646* | 0.0390* | 0.0019* | -0.0674* | 2.23* | 0.8466 | -0.108 | 1.75 | 0.9526 |
| Tucuruí | 0.0923ns | 0.0095* | -0.0005ns | -0.0028ns | 0.3955* | 0.6975 | - | - | - |
| Boa Vista | -0.7143* | 0.0349* | 0.0012* | -0.0369* | 1.41* | 0.8566 | 0.053 | 1.65 | 0.9613 |

Table 68. Coefficients of the model 61 Group V adjusted for the 20 weather stations (p-value 0.01*, 0.05** and not significantns).

| Weather Station | Coefficients | | | Statistical indices | | |
| --- | --- | --- | --- | --- | --- | --- |
| a | b | R^2 | MBE | RMSE | d |
| Rio Branco | 23.57* | -0.1947* | 0.3018 | 0.146 | 3.94 | 0.6750 |
| Macapá | 38.12* | -0.5585* | 0.6647 | 0.067 | 2.95 | 0.9016 |
| Barcelos | 36.02* | -0.4871* | 0.5722 | 0.110 | 3.34 | 0.8604 |
| Eirunepé | 10.15** | -0.0234ns | 0.2314 | - | - | - |
| Itacoatiara | 32.18* | -0.4454* | 0.5401 | 0.020 | 3.61 | 0.8177 |
| Lábrea | 28.70* | -0.3505* | 0.4946 | 0.031 | 2.71 | 0.8097 |
| Manaus | 26.15* | -0.3057* | 0.4075 | 0.101 | 3.86 | 0.7585 |
| Parintins | 36.46* | -0.4948* | 0.5812 | 0.164 | 3.36 | 0.8642 |
| S. G. da Cachoeira | 24.71* | -0.2538* | 0.2478 | 0.173 | 4.13 | 0.6237 |
| Sinop | 21.44* | -0.0945* | 0.1650 | 0.129 | 3.98 | 0.4913 |
| Belém | 26.32* | -0.3370* | 0.3927 | -0.032 | 2.81 | 0.7495 |
| Cametá | 31.15* | -0.3649* | 0.4229 | -0.104 | 2.89 | 0.7495 |
| Conceição do Araguaia | 22.89* | -0.1843* | 0.3469 | 0.124 | 3.51 | 0.7214 |
| Itaituba | 28.48* | -0.3235* | 0.3749 | 0.033 | 3.84 | 0.7162 |
| Marabá | 26.24* | -0.2594* | 0.3878 | -0.036 | 3.10 | 0.7172 |
| Monte Alegre | 31.04* | -0.3508* | 0.4770 | -0.021 | 3.17 | 0.7745 |
| Óbidos | 26.06* | -0.2977* | 0.5696 | -0.014 | 2.79 | 0.8647 |
| Soure | 39.06* | -0.5429* | 0.5221 | -0.022 | 2.91 | 0.8305 |
| Tucuruí | 25.17* | -0.2406* | 0.3551 | -0.104 | 2.79 | 0.7227 |
| Boa Vista | 24.66* | -0.2311* | 0.4427 | 0.144 | 3.28 | 0.7734 |

Table 69. Coefficients of the model 62 Group V adjusted for the 20 weather stations (p-value 0.01*, 0.05** and not significantns).

| Weather Station | Coefficients | | | | | Statistical indices | | |
| --- | --- | --- | --- | --- | --- | --- | --- | --- |
| a | b | c | d | R^2 | MBE | RMSE | d |
| Rio Branco | 0.0324* | 0.1163* | 0.3607* | 0.8035* | 0.8052 | 0.030 | 2.14 | 0.9431 |
| Macapá | 0.0396* | 0.1123* | 0.4516* | 0.8104* | 0.9071 | 0.059 | 1.56 | 0.9766 |
| Barcelos | 0.0351* | 0.1127* | 0.3832* | 0.6435* | 0.8262 | 0.007 | 2.17 | 0.9530 |
| Eirunepé | 0.0013ns | 0.1350* | 0.3097* | 0.6808* | 0.7979 | - | - | - |
| Itacoatiara | 0.0479* | 0.0936* | 0.3885* | 0.7413* | 0.8376 | 0.028 | 2.07 | 0.9538 |
| Lábrea | 0.1265* | 0.0815* | 0.3178* | 0.6830* | 0.7777 | 0.154 | 1.97 | 0.9135 |
| Manaus | 0.0518* | 0.0969* | 0.4094* | 0.8466* | 0.7992 | 0.083 | 2.19 | 0.9474 |
| Parintins | 0.0733* | 0.0728* | 0.4662* | 0.7124* | 0.9003 | 0.087 | 1.83 | 0.9675 |
| S. G. da Cachoeira | -0.0453* | 0.1738* | 0.2741* | 0.9689* | 0.8673 | -0.018 | 1.86 | 0.9588 |
| Sinop | 0.1515* | 0.0821* | 0.3388* | 0.8233* | 0.6650 | 0.077 | 2.46 | 0.8921 |
| Belém | 0.0794* | 0.0846* | 0.3203* | 1.25* | 0.6658 | -0.077 | 2.10 | 0.8947 |
| Cametá | 0.1109* | 0.0687* | 0.4474* | 0.7844* | 0.852 | 0.002 | 1.50 | 0.9535 |
| Conceição do Araguaia | 0.1327* | 0.0410* | 0.4448* | 0.6997* | 0.8263 | -0.068 | 1.89 | 0.9496 |
| Itaituba | 0.1042* | 0.0718* | 0.4294* | 0.6683* | 0.8954 | 0.057 | 1.44 | 0.9755 |
| Marabá | 0.0935* | 0.0862* | 0.3600* | 0.6808* | 0.8256 | -0.067 | 1.67 | 0.9463 |
| Monte Alegre | 0.1331* | 0.0499* | 0.4823* | 0.7233* | 0.9068 | 0.002 | 1.23 | 0.9773 |
| Óbidos | 0.0487* | 0.0876* | 0.3483* | 0.8363* | 0.8065 | -0.039 | 1.93 | 0.9469 |
| Soure | 0.2053* | 0.0450* | 0.4053* | 0.6424* | 0.8477 | -0.112 | 1.69 | 0.9562 |
| Tucuruí | 0.1230* | 0.0836* | 0.3203* | 0.9069* | 0.7108 | -0.086 | 1.90 | 0.9078 |
| Boa Vista | 0.1176* | 0.0766* | 0.4036* | 0.7679* | 0.8503 | 0.039 | 1.72 | 0.9579 |

Table 70. Coefficients of the model 63 Group V adjusted for the 20 weather stations (p-value 0.01*, 0.05** and not significantns).

| Weather Station | Coefficients | | | | Statistical indices | | |
| --- | --- | --- | --- | --- | --- | --- | --- |
| a | b | c | R^2 | MBE | RMSE | d |
| Rio Branco | 0.1333* | 0.0053* | 0.4491* | 0.7615 | 0.065 | 2.40 | 0.9253 |
| Macapá | -0.2121* | 0.0183* | 0.4465* | 0.8943 | 0.061 | 1.70 | 0.9724 |
| Barcelos | -0.3399* | 0.0250* | 0.3994* | 0.7919 | 0.029 | 2.38 | 0.9403 |
| Eirunepé | -0.1332* | 0.0165* | 0.4190* | 0.7338 | 0.084 | 2.02 | 0.9305 |
| Itacoatiara | 0.0577ns | 0.0067* | 0.4327* | 0.8084 | - | - | - |
| Lábrea | -0.0514ns | 0.0143* | 0.3498* | 0.7645 | - | - | - |
| Manaus | 0.0821* | 0.0062* | 0.4423* | 0.7779 | 0.080 | 2.28 | 0.9415 |
| Parintins | -0.1163* | 0.0140* | 0.4401* | 0.8785 | 0.001 | 1.95 | 0.9631 |
| S. G. da Cachoeira | 0.3810* | -0.0058* | 0.4941* | 0.7558 | 0.079 | 2.38 | 0.9261 |
| Sinop | 0.1964* | 0.0056* | 0.3962* | 0.6380 | 0.059 | 2.57 | 0.8798 |
| Belém | -0.0702* | 0.0112* | 0.3404* | 0.6682 | -0.092 | 2.10 | 0.8948 |
| Cametá | 0.1783* | 0.0039* | 0.4352* | 0.8342 | 0.015 | 1.61 | 0.9465 |
| Conceição do Araguaia | 0.3093* | -0.0020* | 0.4634* | 0.8038 | -0.066 | 1.97 | 0.9435 |
| Itaituba | 0.0888* | 0.0075* | 0.4355* | 0.8616 | 0.092 | 1.72 | 0.9644 |
| Marabá | 0.0486ns | 0.0096* | 0.3928* | 0.7927 | - | - | - |
| Monte Alegre | 0.3531* | -0.0032* | 0.4877* | 0.8892 | 0.026 | 1.33 | 0.9726 |
| Óbidos | -0.1163* | 0.0141* | 0.3547* | 0.8017 | -0.058 | 1.94 | 0.9464 |
| Soure | 0.2067* | 0.0050* | 0.3566* | 0.8183 | -0.114 | 1.88 | 0.9452 |
| Tucuruí | 0.0149ns | 0.0108* | 0.3226* | 0.6971 | - | - | - |
| Boa Vista | 0.0644* | 0.0092* | 0.3985* | 0.8428 | 0.041 | 1.76 | 0.9556 |

Table 71. Coefficients of the model 64 Group V adjusted for the 20 weather stations (p-value 0.01*, 0.05** and not significantns).

| Weather Station | Coefficients | | | | Statistical indices | | |
| --- | --- | --- | --- | --- | --- | --- | --- |
| a | b | c | R^2 | MBE | RMSE | d |
| Rio Branco | 0.2715* | -0.0005ns | 0.4674* | 0.7569 | - | - | - |
| Macapá | 0.1822* | 0.0031ns | 0.5065* | 0.8841 | - | - | - |
| Barcelos | 0.2267* | 0.0027ns | 0.4790* | 0.7661 | - | - | - |
| Eirunepé | 0.1253* | 0.0070* | 0.4641* | 0.7200 | 0.123 | 2.13 | 0.9205 |
| Itacoatiara | 0.1788* | 0.0021ns | 0.4557* | 0.8064 | - | - | - |
| Lábrea | 0.2448* | 0.0030* | 0.3875* | 0.7434 | 0.075 | 2.03 | 0.9096 |
| Manaus | 0.2205* | 0.0009ns | 0.4662* | 0.7750 | - | - | - |
| Parintins | 0.1454* | 0.0038* | 0.4882* | 0.8716 | -0.008 | 1.99 | 0.9611 |
| S. G. da Cachoeira | 0.6770* | -0.0190* | 0.4657* | 0.7825 | 0.079 | 2.31 | 0.9309 |
| Sinop | 0.3588* | -0.0013ns | 0.4094* | 0.6335 | - | - | - |
| Belém | 0.1943* | 0.0011ns | 0.3671* | 0.6563 | - | - | - |
| Cametá | 0.3145* | -0.0015ns | 0.4517* | 0.8334 | - | - | - |
| Conceição do Araguaia | 0.3076* | -0.0020* | 0.4513* | 0.8041 | -0.061 | 1.96 | 0.9437 |
| Itaituba | 0.1561* | 0.0053* | 0.4608* | 0.8591 | 0.095 | 1.72 | 0.9639 |
| Marabá | 0.2487* | 0.0019* | 0.4164* | 0.7848 | -0.079 | 1.82 | 0.9348 |
| Monte Alegre | 0.4189* | -0.0064* | 0.4866* | 0.8914 | 0.024 | 1.32 | 0.9733 |
| Óbidos | 0.0598ns | 0.0075* | 0.4089* | 0.7888 | - | - | - |
| Soure | 0.4657* | -0.0055* | 0.3887* | 0.8203 | -0.120 | 1.87 | 0.9453 |
| Tucuruí | 0.2267* | 0.0027* | 0.3519* | 0.6863 | -0.059 | 1.99 | 0.8934 |
| Boa Vista | 0.1766* | 0.0054* | 0.4306* | 0.8362 | 0.053 | 1.81 | 0.9524 |

Table 72. Coefficients of the model 65 Group V adjusted for the 20 weather stations (p-value 0.01*, 0.05** and not significantns).

| Weather Station | Coefficients | | | | Statistical indices | | |
| --- | --- | --- | --- | --- | --- | --- | --- |
| a | b | c | R^2 | MBE | RMSE | d |
| Rio Branco | 0.0198ns | 0.0085* | 0.4099* | 0.7756 | - | - | - |
| Macapá | -0.3213* | 0.0200* | 0.4085* | 0.9013 | 0.068 | 1.61 | 0.9754 |
| Barcelos | -0.2172* | 0.0171* | 0.3694* | 0.8004 | 0.014 | 2.31 | 0.9448 |
| Eirunepé | -0.1792* | 0.0157* | 0.3496* | 0.7705 | 0.057 | 1.91 | 0.9391 |
| Itacoatiara | -0.1741* | 0.0142* | 0.3652* | 0.8243 | 0.029 | 2.22 | 0.9465 |
| Lábrea | -0.0058ns | 0.0106* | 0.3207* | 0.7643 | - | - | - |
| Manaus | -0.0555* | 0.0100* | 0.4089* | 0.7873 | 0.074 | 2.23 | 0.9451 |
| Parintins | -0.1833* | 0.0148* | 0.4073* | 0.8866 | 0.036 | 1.87 | 0.9661 |
| S. G. da Cachoeira | -0.3665* | 0.0211* | 0.3159* | 0.7995 | -0.032 | 2.14 | 0.9438 |
| Sinop | 0.1648* | 0.0058* | 0.3720* | 0.645 | 0.064 | 2.54 | 0.8828 |
| Belém | -0.0173ns | 0.0078* | 0.3349* | 0.6626 | - | - | - |
| Cametá | -0.1252* | 0.0136* | 0.3919* | 0.8452 | 0.006 | 1.56 | 0.9502 |
| Conceição do Araguaia | 0.2411* | 0.0006ns | 0.4524* | 0.8033 | - | - | - |
| Itaituba | -0.0246ns | 0.0104* | 0.3975* | 0.8709 | - | - | - |
| Marabá | -0.0675* | 0.0124* | 0.3402* | 0.8056 | -0.056 | 1.76 | 0.9397 |
| Monte Alegre | 0.2118* | 0.0022* | 0.4634* | 0.8891 | 0.018 | 1.34 | 0.9724 |
| Óbidos | -0.0316ns | 0.0090* | 0.3467* | 0.8008 | - | - | - |
| Soure | -0.1615* | 0.0168* | 0.3321* | 0.8265 | -0.126 | 1.81 | 0.9497 |
| Tucuruí | -0.0344ns | 0.0110* | 0.3072* | 0.7112 | - | - | - |
| Boa Vista | 0.0559* | 0.0082* | 0.3808* | 0.8447 | 0.042 | 1.74 | 0.9564 |

Table 73. Coefficients of the model 66 Group V adjusted for the 20 weather stations (p-value 0.01*, 0.05** and not significantns).

| Weather Station | Coefficients | | | | | Statistical indices | | |
| --- | --- | --- | --- | --- | --- | --- | --- | --- |
| a | b | c | d | R^2 | MBE | RMSE | d |
| Rio Branco | 0.2032* | 0.0047* | -0.0006* | 0.4352* | 0.7633 | 0.073 | 2.39 | 0.9260 |
| Macapá | 0.0489ns | 0.0128* | -0.0014* | 0.4397* | 0.8948 | - | - | - |
| Barcelos | -0.1392ns | 0.0210* | -0.0011* | 0.3951* | 0.7926 | - | - | - |
| Eirunepé | -0.0562ns | 0.0151* | -0.0006* | 0.4189* | 0.7587 | - | - | - |
| Itacoatiara | 0.0208ns | 0.0075* | 0.0002ns | 0.4333* | 0.8084 | - | - | - |
| Lábrea | 0.2139* | 0.0119* | -0.0024* | 0.3160* | 0.7723 | 0.069 | 1.91 | 0.9243 |
| Manaus | -0.0731ns | 0.0097* | 0.0007* | 0.4441* | 0.7784 | - | - | - |
| Parintins | 0.0420ns | 0.0105* | -0.0008ns | 0.4400* | 0.8787 | - | - | - |
| S. G. da Cachoeira | -0.2781* | 0.0093* | 0.0032* | 0.4927* | 0.7668 | 0.076 | 2.30 | 0.9314 |
| Sinop | 0.1893* | 0.0058* | 0.0001ns | 0.3971* | 0.638 | - | - | - |
| Belém | 0.6280* | -0.0034ns | -0.0037* | 0.3207* | 0.6787 | - | - | - |
| Cametá | -0.0049ns | 0.0081* | 0.0009* | 0.4362* | 0.8348 | - | - | - |
| Conceição do Araguaia | 0.1518* | 0.0010ns | 0.0009* | 0.4827* | 0.8068 | - | - | - |
| Itaituba | -0.0559ns | 0.0106* | 0.0008* | 0.4364* | 0.8624 | - | - | - |
| Marabá | 0.0403ns | 0.0097* | 0.0001ns | 0.3933* | 0.7927 | - | - | - |
| Monte Alegre | 0.2558* | -0.0010ns | 0.0005ns | 0.4891* | 0.8893 | - | - | - |
| Óbidos | 0.1371ns | 0.0081* | -0.0012ns | 0.3511* | 0.8025 | - | - | - |
| Soure | -0.4409* | 0.0183* | 0.0035* | 0.3764* | 0.8241 | -0.124 | 1.86 | 0.9460 |
| Tucuruí | 0.1180ns | 0.0084* | -0.0005ns | 0.3208* | 0.6975 | - | - | - |
| Boa Vista | -0.1739* | 0.0154* | 0.0010* | 0.3955* | 0.8443 | 0.046 | 1.74 | 0.9562 |

Table 74. Coefficients of the model 67 Group V adjusted for the 20 weather stations (p-value 0.01*, 0.05** and not significantns).

| Weather Station | Coefficients | | | | Statistical indices | | |
| --- | --- | --- | --- | --- | --- | --- | --- |
| a | b | c | R^2 | MBE | RMSE | d |
| Rio Branco | 0.3394* | 0.0213* | -0.0052* | 0.3329 | 0.022 | 3.86 | 0.7359 |
| Macapá | 0.3654ns | 0.0384* | -0.0114* | 0.6359 | - | - | - |
| Barcelos | -0.4818* | 0.0559* | -0.0061* | 0.5128 | 0.086 | 3.60 | 0.8315 |
| Eirunepé | -0.4322* | 0.0348* | -0.0006* | 0.1660 | 0.008 | 4.10 | 0.5622 |
| Itacoatiara | -0.0796ns | 0.0389* | -0.0067* | 0.4793 | - | - | - |
| Lábrea | 0.8216* | 0.0204* | -0.0113* | 0.5041 | -0.028 | 2.60 | 0.8457 |
| Manaus | -0.6367* | 0.0445* | -0.0019* | 0.3744 | 0.001 | 3.90 | 0.7647 |
| Parintins | -1.45* | 0.0751* | -0.0012ns | 0.5913 | - | - | - |
| S. G. da Cachoeira | -1.26* | 0.0522* | 0.0037* | 0.1981 | 0.216 | 4.25 | 0.5788 |
| Sinop | 0.3783* | 0.0159* | -0.0035* | 0.1384 | -0.056 | 3.98 | 0.6126 |
| Belém | 1.47* | -0.0055* | -0.0115* | 0.3118 | -0.071 | 2.99 | 0.7142 |
| Cametá | -0.9343* | 0.0560* | -0.0008ns | 0.3916 | - | - | - |
| Conceição do Araguaia | 0.8642* | 0.0041* | -0.0064* | 0.2084 | 0.011 | 3.88 | 0.6757 |
| Itaituba | -1.06* | 0.0577* | -0.0002ns | 0.3927 | - | - | - |
| Marabá | 0.6548* | 0.0164* | -0.0076* | 0.2414 | -0.124 | 3.49 | 0.6658 |
| Monte Alegre | -0.0521ns | 0.0352* | -0.0047* | 0.4130 | - | - | - |
| Óbidos | 0.2422ns | 0.0252* | -0.0059* | 0.5069 | - | - | - |
| Soure | -0.5953* | 0.0566* | -0.0055* | 0.5421 | -0.047 | 2.86 | 0.8440 |
| Tucuruí | -0.0744ns | 0.0299* | -0.0033* | 0.3089 | - | - | - |
| Boa Vista | -1.44* | 0.0635* | 0.0030* | 0.4643 | 0.124 | 3.21 | 0.8007 |

Table 75. Coefficients of the model 68 Group V adjusted for the 20 weather stations (p-value 0.01*, 0.05** and not significantns).

| Weather Station | Coefficients | | | Statistical indices | | |
| --- | --- | --- | --- | --- | --- | --- |
| a | b | R^2 | MBE | RMSE | d |
| Rio Branco | 92.21* | -0.8038* | 0.4664 | 0.072 | 3.40 | 0.8068 |
| Macapá | 153.55* | -1.69* | 0.7094 | 0.031 | 2.78 | 0.9182 |
| Barcelos | 130.07* | -1.37* | 0.653 | 0.041 | 3.08 | 0.8938 |
| Eirunepé | 23.14ns | -2.36ns | 0.3478 | - | - | - |
| Itacoatiara | 129.66* | -1.39* | 0.6205 | -0.022 | 3.27 | 0.8668 |
| Lábrea | 103.18* | -0.9999* | 0.5475 | 0.089 | 2.64 | 0.8240 |
| Manaus | 109.19* | -1.11* | 0.4688 | 0.062 | 3.66 | 0.8105 |
| Parintins | 148.81* | -1.58* | 0.6522 | 0.172 | 3.14 | 0.8927 |
| S. G. da Cachoeira | 104.38* | -1.03* | 0.5048 | 0.043 | 3.35 | 0.8176 |
| Sinop | 79.71* | -0.5560* | 0.2845 | 0.048 | 3.62 | 0.6867 |
| Belém | 107.69* | -1.16* | 0.4282 | -0.055 | 2.74 | 0.7869 |
| Cametá | 131.69* | -1.36* | 0.4701 | -0.157 | 2.77 | 0.7965 |
| Conceição do Araguaia | 90.16* | -0.8072* | 0.4655 | 0.063 | 3.20 | 0.8113 |
| Itaituba | 116.78* | -1.18* | 0.474 | -0.014 | 3.51 | 0.8029 |
| Marabá | 103.22* | -0.9714* | 0.4707 | -0.071 | 2.93 | 0.7900 |
| Monte Alegre | 125.27* | -1.23* | 0.4996 | -0.077 | 3.08 | 0.8108 |
| Óbidos | 98.89* | -0.9774* | 0.6011 | -0.051 | 2.70 | 0.8854 |
| Soure | 176.90* | -1.94* | 0.4419 | -0.071 | 3.14 | 0.7938 |
| Tucuruí | 95.93* | -0.8391* | 0.3715 | -0.155 | 2.74 | 0.7659 |
| Boa Vista | 94.33* | -0.8366* | 0.4786 | 0.072 | 3.16 | 0.8164 |

Table 76. Coefficients of the model 69 Group V adjusted for the 20 weather stations (p-value 0.01*, 0.05** and not significantns).

| Weather Station | Coefficients | | | | | Statistical indices | | |
| --- | --- | --- | --- | --- | --- | --- | --- | --- |
| a | b | c | d | R^2 | MBE | RMSE | d |
| Rio Branco | 0.0299ns | 0.0088* | 0.0282* | -0.0013* | 0.5689 | - | - | - |
| Macapá | -0.3428* | 0.0374* | 0.0215* | -0.0060* | 0.7351 | 0.075 | 2.64 | 0.9272 |
| Barcelos | 0.3275* | 0.0168* | 0.0196* | -0.0068* | 0.6540 | 0.031 | 3.00 | 0.8987 |
| Eirunepé | -0.1219* | 0.0093* | 0.0322* | -0.0006* | 0.6346 | -0.053 | 2.54 | 0.8867 |
| Itacoatiara | -0.6016* | 0.0333* | 0.0167* | -0.0016* | 0.6521 | -0.006 | 3.13 | 0.8815 |
| Lábrea | 0.3212* | 0.0177* | 0.0077* | -0.0063* | 0.5709 | 0.099 | 2.60 | 0.8421 |
| Manaus | -0.2166* | 0.0201* | 0.0260* | -0.0025* | 0.5136 | 0.049 | 3.46 | 0.8404 |
| Parintins | -0.6367* | 0.0404* | 0.0148* | -0.0030* | 0.6788 | 0.202 | 3.12 | 0.8949 |
| S. G. da Cachoeira | -0.4500* | 0.0168* | 0.0338* | 0.0008* | 0.7905 | -0.086 | 2.32 | 0.9323 |
| Sinop | -0.1996* | 0.0094* | 0.0235* | 0.0020* | 0.3238 | 0.049 | 3.53 | 0.7339 |
| Belém | 0.3084* | 0.0128* | 0.0195* | -0.0062* | 0.4382 | -0.066 | 2.71 | 0.7938 |
| Cametá | -0.7784* | 0.0450* | 0.0128* | -0.0031* | 0.5593 | -0.122 | 2.53 | 0.8401 |
| Conceição do Araguaia | -0.2704* | 0.0164* | 0.0183* | 0.0004ns | 0.4982 | - | - | - |
| Itaituba | -0.8421* | 0.0320* | 0.0223* | 0.0016* | 0.6118 | -0.036 | 3.00 | 0.8724 |
| Marabá | -0.7876* | 0.0322* | 0.0167* | 0.0012* | 0.5709 | -0.031 | 2.58 | 0.8487 |
| Monte Alegre | -0.3756* | 0.0295* | 0.0200* | -0.0020* | 0.5146 | -0.117 | 3.06 | 0.8173 |
| Óbidos | 0.3515ns | 0.0043ns | 0.0229* | -0.0035* | 0.5756 | - | - | - |
| Soure | -0.1770ns | 0.0460* | 0.0074* | -0.0096* | 0.5772 | - | - | - |
| Tucuruí | 0.2297* | 0.0124* | 0.0149* | -0.0035* | 0.3793 | -0.161 | 2.75 | 0.7676 |
| Boa Vista | -0.2830* | 0.0173* | 0.0261* | -0.0003ns | 0.6081 | - | - | - |

Table 77. Coefficients of the model 70 Group V adjusted for the 20 weather stations (p-value 0.01*, 0.05** and not significantns).

| Weather Station | Coefficients | | | | | | Statistical indices | | |
| --- | --- | --- | --- | --- | --- | --- | --- | --- | --- |
| a | b | c | d | e | R^2 | MBE | RMSE | d |
| Rio Branco | 0.0299* | 22.58* | -22.57* | -22.54* | -0.0013* | 0.5689 | -0.070 | 3.03 | 0.8670 |
| Macapá | -0.3428* | -32.06ns | 32.10ns | 32.12ns | -0.0060* | 0.7351 | - | - | - |
| Barcelos | 0.3275* | 2.90ns | -2.89ns | -2.87ns | -0.0068* | 0.654 | - | - | - |
| Eirunepé | -0.1219* | -20.47* | 20.48* | 20.51* | -0.0006* | 0.6346 | -0.053 | 2.54 | 0.8867 |
| Itacoatiara | -0.6016* | -22.08* | 22.11* | 22.13* | -0.0016* | 0.6521 | -0.006 | 3.13 | 0.8815 |
| Lábrea | 0.3212* | 32.61ns | -32.59ns | -32.58ns | -0.0063* | 0.5709 | - | - | - |
| Manaus | -0.2167* | 21.03* | -21.01* | -20.99* | -0.0025* | 0.5136 | 0.049 | 3.46 | 0.8404 |
| Parintins | -0.6367* | 19.73* | -19.69* | -19.67* | -0.0030* | 0.6788 | 0.202 | 3.12 | 0.8949 |
| S. G. da Cachoeira | -0.4500* | -56.73ns | 56.75ns | 56.78ns | 0.0008* | 0.7905 | - | - | - |
| Sinop | -0.1996* | 21.23ns | -21.23ns | -21.20ns | 0.0020* | 0.3238 | - | - | - |
| Belém | 0.3084* | 21.54* | -21.53* | -21.51* | -0.0062* | 0.4382 | -0.066 | 2.71 | 0.7938 |
| Cametá | -0.7784* | 61.93* | -61.89* | -61.88* | -0.0031* | 0.5593 | -0.122 | 2.53 | 0.8401 |
| Conceição do Araguaia | -0.2704* | 0.0348ns | -0.0184ns | -0.0002ns | 0.0004ns | 0.4982 | - | - | - |
| Itaituba | -0.8421* | 20.73ns | -20.70ns | -20.68ns | 0.0016* | 0.6118 | - | - | - |
| Marabá | -0.7876* | -24.15* | 24.19* | 24.20* | 0.0012* | 0.5709 | -0.031 | 2.58 | 0.8487 |
| Monte Alegre | -0.3756* | -31.13* | 31.16* | 31.18* | -0.0020* | 0.5146 | -0.117 | 3.06 | 0.8173 |
| Óbidos | 0.3515* | -23.98* | 23.98* | 24.00* | -0.0035* | 0.5756 | -0.022 | 2.80 | 0.8733 |
| Soure | -0.1770ns | -32.30ns | 32.35ns | 32.35ns | -0.0096* | 0.5772 | - | - | - |
| Tucuruí | 0.2297* | 33.17ns | -33.15ns | -33.14ns | -0.0035* | 0.3793 | - | - | - |
| Boa Vista | -0.2830* | 28.52* | -28.51* | -28.48* | -0.0003* | 0.6081 | 0.065 | 2.78 | 0.8731 |

Table 78. Coefficients of the model 71 Group V adjusted for the 20 weather stations (p-value 0.01*, 0.05** and not significantns).

| Weather Station | Coefficients | | | | Statistical indices | | |
| --- | --- | --- | --- | --- | --- | --- | --- |
| a | b | c | R^2 | MBE | RMSE | d |
| Rio Branco | 0.0565* | 0.0839* | 0.3547* | 0.7939 | 0.035 | 2.21 | 0.9382 |
| Macapá | 0.0162ns | 0.1037* | 0.4254* | 0.9015 | - | - | - |
| Barcelos | 0.0443* | 0.0957* | 0.3631* | 0.8025 | 0.010 | 2.34 | 0.9434 |
| Eirunepé | -0.0025ns | 0.1114* | 0.2982* | 0.7764 | - | - | - |
| Itacoatiara | 0.0438* | 0.0827* | 0.3735* | 0.8271 | 0.033 | 2.15 | 0.9495 |
| Lábrea | 0.1813* | 0.0516* | 0.3182* | 0.7582 | 0.117 | 2.01 | 0.9103 |
| Manaus | 0.0513* | 0.0780* | 0.4045* | 0.7937 | 0.091 | 2.21 | 0.9460 |
| Parintins | 0.0573* | 0.0808* | 0.4265* | 0.8872 | 0.049 | 1.87 | 0.9659 |
| S. G. da Cachoeira | -0.0974* | 0.1479* | 0.2535* | 0.8667 | -0.034 | 1.85 | 0.9590 |
| Sinop | 0.2253* | 0.0402* | 0.3495* | 0.6516 | 0.089 | 2.54 | 0.8812 |
| Belém | 0.1054* | 0.0438* | 0.3357* | 0.6627 | -0.086 | 2.13 | 0.8914 |
| Cametá | 0.1223* | 0.0615* | 0.4183* | 0.8453 | -0.006 | 1.54 | 0.9510 |
| Conceição do Araguaia | 0.2011* | 0.0242* | 0.4170* | 0.8072 | -0.051 | 1.96 | 0.9441 |
| Itaituba | 0.1207* | 0.0675* | 0.3915* | 0.8729 | 0.092 | 1.65 | 0.9673 |
| Marabá | 0.1543* | 0.0565* | 0.3431* | 0.8017 | -0.061 | 1.76 | 0.9387 |
| Monte Alegre | 0.1601* | 0.0484* | 0.4415* | 0.8955 | 0.010 | 1.29 | 0.9745 |
| Óbidos | 0.0834* | 0.0581* | 0.3418* | 0.8003 | -0.046 | 1.95 | 0.9456 |
| Soure | 0.2037* | 0.0542* | 0.3822* | 0.8296 | -0.128 | 1.81 | 0.9496 |
| Tucuruí | 0.1296* | 0.0628* | 0.3153* | 0.7094 | -0.081 | 1.91 | 0.9060 |
| Boa Vista | 0.1524* | 0.0576* | 0.3785* | 0.8438 | 0.038 | 1.74 | 0.9565 |

Table 79. Coefficients of the model 72 Group V adjusted for the 20 weather stations (p-value 0.01*, 0.05** and not significantns).

| Weather Station | Coefficients | | | | | Statistical indices | | |
| --- | --- | --- | --- | --- | --- | --- | --- | --- |
| a | b | c | d | R^2 | MBE | RMSE | d |
| Rio Branco | 0.1010* | -0.0096* | 0.0132* | 0.3674* | 0.7866 | 0.030 | 2.27 | 0.9351 |
| Macapá | -0.1949* | -0.0080* | 0.0221* | 0.4045* | 0.9026 | 0.064 | 1.59 | 0.9758 |
| Barcelos | -0.1648* | -0.0029* | 0.0176* | 0.3645* | 0.8009 | 0.014 | 2.31 | 0.9446 |
| Eirunepé | -0.0947* | -0.0077* | 0.0188* | 0.3163* | 0.7753 | 0.047 | 1.89 | 0.9412 |
| Itacoatiara | -0.0653ns | -0.0069* | 0.0161* | 0.3611* | 0.8261 | - | - | - |
| Lábrea | 0.0050ns | -0.0007ns | 0.0108* | 0.3182* | 0.7644 | - | - | - |
| Manaus | 0.0517* | -0.0092* | 0.0137* | 0.4013* | 0.7913 | 0.086 | 2.21 | 0.9457 |
| Parintins | -0.1024* | -0.0058* | 0.0167* | 0.4055* | 0.8877 | 0.044 | 1.87 | 0.9664 |
| S. G. da Cachoeira | 0.0868* | -0.0274* | 0.0277* | 0.2519* | 0.8570 | -0.044 | 1.91 | 0.9560 |
| Sinop | 0.2009* | -0.0018ns | 0.0059* | 0.3654* | 0.6457 | - | - | - |
| Belém | 0.0281ns | -0.0025ns | 0.0083* | 0.3331* | 0.6628 | - | - | - |
| Cametá | -0.0516ns | -0.0061* | 0.0159* | 0.3916* | 0.8480 | - | - | - |
| Conceição do Araguaia | 0.2804* | -0.0022* | 0.0011ns | 0.4420* | 0.8044 | - | - | - |
| Itaituba | 0.0007ns | -0.0017ns | 0.0109* | 0.3950* | 0.8711 | - | - | - |
| Marabá | -0.0562* | -0.0006ns | 0.0125* | 0.3385* | 0.8056 | - | - | - |
| Monte Alegre | 0.3236* | -0.0101* | 0.0064* | 0.4586* | 0.8944 | 0.014 | 1.30 | 0.9743 |
| Óbidos | -0.0620ns | 0.0017ns | 0.0087* | 0.3488* | 0.8009 | - | - | - |
| Soure | -0.0760ns | -0.0087* | 0.0209* | 0.3516* | 0.8331 | - | - | - |
| Tucuruí | 0.0393ns | -0.0050* | 0.0124* | 0.3056* | 0.7131 | - | - | - |
| Boa Vista | 0.0799* | -0.0021ns | 0.0090* | 0.3767* | 0.8449 | - | - | - |

Table 80. Coefficients of the model 73 Group V adjusted for the 20 weather stations (p-value 0.01*, 0.05** and not significantns).

| Weather Station | Coefficients | | | | | | Statistical indices | | |
| --- | --- | --- | --- | --- | --- | --- | --- | --- | --- |
| a | b | c | d | e | R^2 | MBE | RMSE | d |
| Rio Branco | 0.0856* | 0.0135* | -0.0100* | 0.0002ns | 0.3691* | 0.7868 | - | - | - |
| Macapá | -0.0275ns | 0.0197* | -0.0085* | -0.0010* | 0.3988* | 0.9031 | - | - | - |
| Barcelos | 0.1574* | 0.0151* | -0.0043* | -0.0024* | 0.3427* | 0.8063 | 0.017 | 2.26 | 0.9472 |
| Eirunepé | -0.0289ns | 0.0180* | -0.0074* | -0.0007* | 0.3186* | 0.7824 | - | - | - |
| Itacoatiara | -0.3968* | 0.0195* | -0.0044* | 0.0020* | 0.3695* | 0.8283 | 0.034 | 2.17 | 0.9488 |
| Lábrea | 0.2501* | 0.0072* | 0.0028ns | -0.0025* | 0.3039* | 0.7707 | - | - | - |
| Manaus | -0.0951* | 0.0153* | -0.0077* | 0.0008* | 0.4061* | 0.7920 | 0.083 | 2.20 | 0.9463 |
| Parintins | -0.0343ns | 0.0160* | -0.0063* | -0.0004ns | 0.4045* | 0.8878 | - | - | - |
| S. G. da Cachoeira | -0.2258* | 0.0295* | -0.0229* | 0.0018* | 0.2669* | 0.8646 | -0.040 | 1.87 | 0.9583 |
| Sinop | 0.0163ns | 0.0114* | -0.0066* | 0.0014* | 0.3619* | 0.6537 | - | - | - |
| Belém | 0.4614* | 0.0036* | -0.0040* | -0.0029* | 0.3092* | 0.6798 | -0.085 | 2.07 | 0.8995 |
| Cametá | -0.1660* | 0.0170* | -0.0049* | 0.0006* | 0.3957* | 0.8485 | -0.001 | 1.54 | 0.9517 |
| Conceição do Araguaia | 0.0581ns | 0.0053* | -0.0033* | 0.0014* | 0.4492* | 0.8112 | - | - | - |
| Itaituba | -0.2340* | 0.0143* | -0.0010ns | 0.0014* | 0.3945* | 0.8739 | - | - | - |
| Marabá | -0.2266* | 0.0157* | -0.0014ns | 0.0011* | 0.3380* | 0.8078 | - | - | - |
| Monte Alegre | -0.0312ns | 0.0116* | -0.0080* | 0.0018* | 0.4645* | 0.8967 | - | - | - |
| Óbidos | 0.2211ns | 0.0045* | 0.0003ns | -0.0014* | 0.3448* | 0.8027 | - | - | - |
| Soure | -0.3188* | 0.0225* | -0.0060* | 0.0015* | 0.3638* | 0.8342 | -0.139 | 1.77 | 0.9520 |
| Tucuruí | 0.0556ns | 0.0122* | -0.0051* | -0.0001ns | 0.3050* | 0.7131 | - | - | - |
| Boa Vista | 0.0505ns | 0.0094* | -0.0017ns | 0.0001ns | 0.3769* | 0.8449 | - | - | - |

Table 81. Coefficients of the model 74 Group V adjusted for the 20 weather stations (p-value 0.01*, 0.05** and not significantns).

| Weather Station | Coefficients | | | | Statistical indices | | |
| --- | --- | --- | --- | --- | --- | --- | --- |
| a | b | c | R^2 | MBE | RMSE | d |
| Rio Branco | -0.0888* | 0.2152* | -0.0012* | 0.5920 | -0.048 | 2.93 | 0.8764 |
| Macapá | 0.6321* | 0.2442* | -0.0099* | 0.7208 | 0.040 | 2.74 | 0.9213 |
| Barcelos | 0.5156* | 0.1981* | -0.0076* | 0.6712 | 0.016 | 2.96 | 0.9035 |
| Eirunepé | -0.2404* | 0.2353* | -0.0006* | 0.6451 | -0.048 | 2.50 | 0.8916 |
| Itacoatiara | 0.3539* | 0.2177* | -0.0063* | 0.6415 | -0.009 | 3.16 | 0.8773 |
| Lábrea | 0.5188* | 0.1357* | -0.0059* | 0.5606 | 0.110 | 2.64 | 0.8273 |
| Manaus | 0.1628* | 0.2270* | -0.0046* | 0.5147 | 0.068 | 3.51 | 0.8355 |
| Parintins | 0.6228* | 0.2249* | -0.0090* | 0.6626 | 0.199 | 3.14 | 0.8927 |
| S. G. da Cachoeira | -0.2043* | 0.2424* | -0.0007* | 0.7826 | -0.044 | 2.40 | 0.9264 |
| Sinop | -0.3085* | 0.2049* | 0.0020* | 0.3723 | 0.067 | 3.39 | 0.7601 |
| Belém | 0.4286* | 0.1717* | -0.0067* | 0.4397 | -0.057 | 2.72 | 0.7931 |
| Cametá | 0.5617* | 0.2131* | -0.0082* | 0.5025 | -0.170 | 2.67 | 0.8129 |
| Conceição do Araguaia | -0.0591* | 0.1835* | -0.0006* | 0.5272 | 0.068 | 3.08 | 0.8305 |
| Itaituba | -0.1900* | 0.2701* | -0.0011* | 0.6005 | -0.001 | 3.05 | 0.8646 |
| Marabá | -0.0603ns | 0.2130* | -0.0012* | 0.5462 | - | - | - |
| Monte Alegre | 0.4891* | 0.1984* | -0.0064* | 0.5129 | -0.096 | 3.03 | 0.8194 |
| Óbidos | 0.1646* | 0.1752* | -0.0034* | 0.598 | -0.018 | 2.74 | 0.8811 |
| Soure | 1.53* | 0.1138* | -0.0163* | 0.5346 | -0.049 | 2.86 | 0.8435 |
| Tucuruí | 0.4534* | 0.1334* | -0.0046* | 0.3790 | -0.166 | 2.73 | 0.7715 |
| Boa Vista | -0.1065* | 0.2432* | -0.0017* | 0.6108 | 0.046 | 2.75 | 0.8770 |

Table 82. Coefficients of the model 75 Group V adjusted for the 20 weather stations (p-value 0.01*, 0.05** and not significantns).

| Weather Station | Coefficients | | | | | Statistical indices | | |
| --- | --- | --- | --- | --- | --- | --- | --- | --- |
| a | b | c | d | R^2 | MBE | RMSE | d |
| Rio Branco | 3.69* | -0.0267* | 0.0344* | -0.0016* | 0.5772 | -0.009 | 3.00 | 0.8642 |
| Macapá | 16.60* | -0.0269* | 0.0461* | -0.0095* | 0.7488 | 0.090 | 2.52 | 0.9327 |
| Barcelos | 16.98* | -0.0214* | 0.0353* | -0.0076* | 0.6752 | 0.059 | 2.91 | 0.9040 |
| Eirunepé | 3.10* | -0.0365* | 0.0386* | -0.0009* | 0.6368 | -0.004 | 2.52 | 0.8839 |
| Itacoatiara | 14.62* | -0.0303* | 0.0403* | -0.0063* | 0.6735 | 0.038 | 3.02 | 0.8860 |
| Lábrea | 6.05* | -0.0031ns | 0.0260* | -0.0059* | 0.5809 | - | - | - |
| Manaus | 15.00* | -0.0346* | 0.0388* | -0.0049* | 0.5491 | 0.128 | 3.36 | 0.8425 |
| Parintins | 19.73* | -0.0283* | 0.0428* | -0.0088* | 0.7078 | 0.233 | 2.98 | 0.9018 |
| S. G. da Cachoeira | 2.26* | -0.0434* | 0.0458* | -0.0009* | 0.7824 | -0.051 | 3.87 | 0.9271 |
| Sinop | 4.36* | -0.0188* | 0.0234* | 0.0005ns | 0.3310 | - | - | - |
| Belém | 18.74* | -0.0241* | 0.0298* | -0.0065* | 0.4985 | -0.022 | 2.58 | 0.8083 |
| Cametá | 8.12* | -0.0226* | 0.0425* | -0.0067* | 0.5564 | -0.115 | 2.53 | 0.8306 |
| Conceição do Araguaia | 4.64* | -0.0179* | 0.0258* | -0.0012* | 0.5014 | 0.100 | 3.12 | 0.8158 |
| Itaituba | 5.20* | -0.0344* | 0.0423* | -0.0025* | 0.5934 | 0.030 | 3.08 | 0.8558 |
| Marabá | 6.50* | -0.0185* | 0.0300* | -0.0029* | 0.5534 | -0.011 | 2.66 | 0.8231 |
| Monte Alegre | 23.18* | -0.0312* | 0.0367* | -0.0066* | 0.5879 | -0.040 | 2.81 | 0.8409 |
| Óbidos | 15.11* | -0.0196* | 0.0253* | -0.0045* | 0.6169 | 0.027 | 2.65 | 0.8831 |
| Soure | 11.97* | -0.0093* | 0.0429* | -0.0113* | 0.5887 | -0.057 | 2.67 | 0.8668 |
| Tucuruí | 13.37* | -0.0197* | 0.0270* | -0.0037* | 0.4328 | -0.118 | 2.63 | 0.7749 |
| Boa Vista | 22.95* | -0.0441* | 0.0376* | -0.0046* | 0.6632 | 0.075 | 2.53 | 0.8917 |

Table 83. Coefficients of the model 76 Group V adjusted for the 20 weather stations (p-value 0.01*, 0.05** and not significantns).

| Weather Station | Coefficients | | | | | Statistical indices | | |
| --- | --- | --- | --- | --- | --- | --- | --- | --- |
| a | b | c | d | R^2 | MBE | RMSE | d |
| Rio Branco | 4.91* | -0.0309* | 0.0350* | -0.0400* | 0.5689 | -0.009 | 3.03 | 0.8601 |
| Macapá | 40.00* | -0.0417* | 0.0409* | -0.4039* | 0.7246 | 0.071 | 2.67 | 0.9230 |
| Barcelos | 30.27* | -0.0289* | 0.0311* | -0.3003* | 0.6532 | 0.072 | 3.04 | 0.8929 |
| Eirunepé | 3.85* | -0.0378* | 0.0385* | -0.0247* | 0.6317 | -0.004 | 2.53 | 0.8825 |
| Itacoatiara | 31.56* | -0.0412* | 0.0370* | -0.2743* | 0.6458 | 0.036 | 3.13 | 0.8739 |
| Lábrea | 19.25* | -0.0113* | 0.0217* | -0.2329* | 0.5564 | 0.100 | 2.62 | 0.8298 |
| Manaus | 25.68* | -0.0413* | 0.0363* | -0.2021* | 0.5256 | 0.138 | 3.47 | 0.8285 |
| Parintins | 46.98* | -0.0418* | 0.0360* | -0.4126* | 0.673 | 0.224 | 3.11 | 0.8914 |
| S. G. da Cachoeira | 0.56ns | -0.0435* | 0.0459* | -0.0123ns | 0.7798 | - | - | - |
| Sinop | 1.00ns | -0.0218* | 0.0264* | 0.0491* | 0.338 | - | - | - |
| Belém | 34.83* | -0.0350* | 0.0258* | -0.2602* | 0.4793 | -0.013 | 2.63 | 0.7986 |
| Cametá | 25.52* | -0.0297* | 0.0357* | -0.2858* | 0.5171 | -0.131 | 2.63 | 0.8095 |
| Conceição do Araguaia | 4.53* | -0.0210* | 0.0267* | -0.0216* | 0.4943 | 0.100 | 3.16 | 0.8092 |
| Itaituba | 5.84* | -0.0410* | 0.0443* | -0.0524* | 0.5799 | 0.036 | 3.15 | 0.8468 |
| Marabá | 7.13* | -0.0262* | 0.0317* | -0.0579* | 0.5272 | -0.021 | 2.71 | 0.8113 |
| Monte Alegre | 41.37* | -0.0373* | 0.0297* | -0.3048* | 0.5603 | -0.032 | 2.88 | 0.8282 |
| Óbidos | 32.31* | -0.0257* | 0.0194* | -0.2266* | 0.6173 | 0.007 | 2.64 | 0.8833 |
| Soure | 46.33* | -0.0168* | 0.0263* | -0.5257* | 0.5548 | -0.035 | 2.79 | 0.8493 |
| Tucuruí | 23.34* | -0.0243* | 0.0236* | -0.1622* | 0.4222 | -0.120 | 2.64 | 0.7705 |
| Boa Vista | 27.32* | -0.0474* | 0.0357* | -0.1552* | 0.6396 | 0.082 | 2.61 | 0.8824 |

Table 84. Coefficients of the model 77 Group V adjusted for the 20 weather stations (p-value 0.01*, 0.05** and not significantns).

| Weather Station | Coefficients | | | | Statistical indices | | |
| --- | --- | --- | --- | --- | --- | --- | --- |
| a | b | c | R^2 | MBE | RMSE | d |
| Rio Branco | 1.19ns | 0.1945* | -0.0019* | 0.5910 | - | - | - |
| Macapá | 22.61* | 0.2437* | -0.0098* | 0.7379 | 0.068 | 2.58 | 0.9286 |
| Barcelos | 18.45* | 0.2020* | -0.0077* | 0.6895 | 0.038 | 2.88 | 0.9082 |
| Eirunepé | -3.97* | 0.2060* | -0.0012* | 0.6096 | 0.005 | 2.62 | 0.8710 |
| Itacoatiara | 16.04* | 0.2093* | -0.0071* | 0.6774 | 0.043 | 2.99 | 0.8886 |
| Lábrea | 2.89* | 0.1803* | -0.0021* | 0.5427 | 0.150 | 2.76 | 0.8005 |
| Manaus | 12.39* | 0.1940* | -0.0057* | 0.5496 | 0.122 | 3.37 | 0.8423 |
| Parintins | 24.30* | 0.2250* | -0.0096* | 0.7087 | 0.254 | 2.99 | 0.9006 |
| S. G. da Cachoeira | -3.83* | 0.2303* | -0.0015* | 0.7738 | -0.024 | 2.42 | 0.9237 |
| Sinop | 2.29* | 0.1405* | -0.0001ns | 0.3581 | - | - | - |
| Belém | 17.60* | 0.1582* | -0.0069* | 0.4972 | -0.020 | 2.59 | 0.8073 |
| Cametá | 16.62* | 0.2269* | -0.0074* | 0.5167 | -0.148 | 2.62 | 0.8106 |
| Conceição do Araguaia | 3.37* | 0.1571* | -0.0015* | 0.5312 | 0.106 | 3.05 | 0.8268 |
| Itaituba | 4.27* | 0.2249* | -0.0035* | 0.5999 | 0.031 | 3.05 | 0.8596 |
| Marabá | 6.68* | 0.1724* | -0.0028* | 0.5596 | -0.018 | 2.64 | 0.8259 |
| Monte Alegre | 22.31* | 0.1837* | -0.0075* | 0.5963 | -0.034 | 2.78 | 0.8452 |
| Óbidos | 13.77* | 0.1482* | -0.0050* | 0.6352 | 0.022 | 2.59 | 0.8903 |
| Soure | 48.29* | 0.0927* | -0.0131* | 0.4449 | -0.034 | 3.10 | 0.7920 |
| Tucuruí | 13.97* | 0.1443* | -0.0042* | 0.4312 | -0.126 | 2.62 | 0.7785 |
| Boa Vista | 9.06* | 0.1824* | -0.0041* | 0.6268 | 0.098 | 2.68 | 0.8752 |

Table 85. Coefficients of the model 78 Group V adjusted for the 20 weather stations (p-value 0.01*, 0.05** and not significantns).

| Weather Station | Coefficients | | | | Statistical indices | | |
| --- | --- | --- | --- | --- | --- | --- | --- |
| a | b | c | R^2 | MBE | RMSE | d |
| Rio Branco | 2.50* | 0.1842* | -0.0726* | 0.5690 | 0.009 | 3.04 | 0.8596 |
| Macapá | 34.09* | 0.1878* | -0.4314* | 0.7152 | 0.066 | 2.74 | 0.9187 |
| Barcelos | 23.13* | 0.1784* | -0.3016* | 0.6644 | 0.053 | 2.98 | 0.8992 |
| Eirunepé | -5.18* | 0.2044* | -0.0230* | 0.5923 | 0.007 | 2.69 | 0.8634 |
| Itacoatiara | 23.47* | 0.1673* | -0.2979* | 0.6290 | 0.038 | 3.24 | 0.8645 |
| Lábrea | 15.39* | 0.1430* | -0.1817* | 0.5517 | 0.117 | 2.68 | 0.8184 |
| Manaus | 15.94* | 0.1631* | -0.2108* | 0.4985 | 0.118 | 3.55 | 0.8167 |
| Parintins | 34.46* | 0.1645* | -0.3997* | 0.6593 | 0.219 | 3.11 | 0.8905 |
| S. G. da Cachoeira | -5.98* | 0.2300* | -0.0279* | 0.7671 | -0.011 | 2.47 | 0.9199 |
| Sinop | 0.4977ns | 0.1476* | 0.0083ns | 0.3584 | - | - | - |
| Belém | 26.16* | 0.1108* | -0.2940* | 0.4428 | -0.026 | 2.70 | 0.7803 |
| Cametá | 26.13* | 0.1684* | -0.3135* | 0.5034 | -0.130 | 2.67 | 0.8014 |
| Conceição do Araguaia | 3.46* | 0.1559* | -0.0519* | 0.5167 | 0.107 | 3.11 | 0.8172 |
| Itaituba | 2.63* | 0.2205* | -0.0967* | 0.5662 | 0.033 | 3.21 | 0.8389 |
| Marabá | 7.54* | 0.1666* | -0.1019* | 0.5205 | -0.020 | 2.74 | 0.8073 |
| Monte Alegre | 29.19* | 0.1301* | -0.2934* | 0.5386 | -0.028 | 2.97 | 0.8132 |
| Óbidos | 24.52* | 0.0958* | -0.2422* | 0.6051 | 0.004 | 2.68 | 0.8794 |
| Soure | 56.13* | 0.0942* | -0.5751* | 0.5456 | -0.025 | 2.81 | 0.8448 |
| Tucuruí | 20.24* | 0.1078* | -0.1826* | 0.4107 | -0.119 | 2.66 | 0.7651 |
| Boa Vista | 5.27* | 0.1818* | -0.0921* | 0.5862 | 0.116 | 2.82 | 0.8564 |

Table 86. Coefficients of the model 79 Group V adjusted for the 20 weather stations (p-value 0.01*, 0.05** and not significantns).

| Weather Station | Coefficients | | | | | Statistical indices | | |
| --- | --- | --- | --- | --- | --- | --- | --- | --- |
| a | b | c | d | R^2 | MBE | RMSE | d |
| Rio Branco | 0.4869* | -16.63* | 0.2962* | 14.81* | 0.7639 | 0.049 | 2.41 | 0.9254 |
| Macapá | 0.2645* | -23.51* | 0.8020* | 14.42* | 0.9042 | 0.084 | 1.58 | 0.9760 |
| Barcelos | 0.2712* | -19.49* | 0.6804* | 12.85* | 0.802 | 0.020 | 2.30 | 0.9451 |
| Eirunepé | 0.2876* | -18.47* | 0.6280* | 11.75* | 0.7681 | 0.088 | 1.94 | 0.9358 |
| Itacoatiara | 0.3697* | -21.85* | 0.5893* | 12.62* | 0.8225 | 0.043 | 2.22 | 0.9457 |
| Lábrea | 0.5862* | -19.45* | 0.3143* | 12.21* | 0.7509 | 0.077 | 2.01 | 0.9148 |
| Manaus | 0.2186* | -13.01* | 0.4700* | 13.77* | 0.7947 | 0.094 | 2.18 | 0.9466 |
| Parintins | 0.5248* | -26.78* | 0.5758* | 14.48* | 0.8836 | 0.023 | 1.88 | 0.9658 |
| S. G. da Cachoeira | 0.1797* | -21.89* | 0.8388* | 11.03* | 0.8024 | -0.027 | 2.13 | 0.9442 |
| Sinop | 0.5760* | -15.64* | 0.2234* | 13.56* | 0.6346 | 0.066 | 2.60 | 0.8760 |
| Belém | 0.2069* | -11.23* | 0.3884* | 11.37* | 0.6719 | -0.080 | 2.10 | 0.8929 |
| Cametá | 0.5236* | -24.98* | 0.5388* | 14.00* | 0.8443 | 0.010 | 1.57 | 0.9491 |
| Conceição do Araguaia | 0.6571* | -15.41* | 0.0152ns | 17.10* | 0.7974 | - | - | - |
| Itaituba | 0.5180* | -20.51* | 0.4046* | 14.21* | 0.8678 | 0.094 | 1.70 | 0.9649 |
| Marabá | 0.4785* | -21.18* | 0.4956* | 11.80* | 0.8003 | -0.044 | 1.77 | 0.9379 |
| Monte Alegre | 0.4613* | -11.96* | 0.1804* | 16.25* | 0.8914 | 0.024 | 1.33 | 0.9724 |
| Óbidos | 0.3778* | -16.85* | 0.3942* | 12.10* | 0.8017 | -0.041 | 1.93 | 0.9460 |
| Soure | 0.4611* | -23.29* | 0.6348* | 11.92* | 0.8266 | -0.120 | 1.81 | 0.9490 |
| Tucuruí | 0.5746* | -21.98* | 0.3893* | 11.44* | 0.7115 | -0.080 | 1.91 | 0.9069 |
| Boa Vista | 0.0396ns | -9.69* | 0.6279* | 12.20* | 0.8701 | - | - | - |

Table 87. Coefficients of the model 80 Group V adjusted for the 20 weather stations (p-value 0.01*, 0.05** and not significantns).

| Weather Station | Coefficients | | | | | Statistical indices | | |
| --- | --- | --- | --- | --- | --- | --- | --- | --- |
| a | b | c | d | R^2 | MBE | RMSE | d |
| Rio Branco | 0.5827* | -9.48* | -0.0272* | 16.51* | 0.7508 | 0.082 | 2.47 | 0.9208 |
| Macapá | 0.2259* | 14.29* | -0.1518* | 15.63* | 0.8961 | 0.068 | 1.68 | 0.9730 |
| Barcelos | 0.4547* | 7.40* | -0.1495* | 14.98* | 0.7826 | 0.043 | 2.40 | 0.9383 |
| Eirunepé | 0.4293* | -2.80* | -0.0343* | 16.04* | 0.7196 | 0.136 | 2.16 | 0.9186 |
| Itacoatiara | 0.4920* | -5.86* | -0.0427* | 15.86* | 0.8033 | 0.036 | 2.30 | 0.9408 |
| Lábrea | 0.6354* | -2.07ns | -0.1134* | 12.41* | 0.7515 | - | - | - |
| Manaus | 0.3063* | 0.5707ns | -0.0330* | 15.87* | 0.7775 | - | - | - |
| Parintins | 0.5833* | -4.36* | -0.0923* | 16.36* | 0.8738 | -0.027 | 1.95 | 0.9635 |
| S. G. da Cachoeira | 0.5139* | -16.15* | 0.0691* | 18.19* | 0.7633 | 0.085 | 2.35 | 0.9287 |
| Sinop | 0.6000* | -9.28* | -0.0097ns | 14.94* | 0.6219 | - | - | - |
| Belém | 0.2372* | 10.15* | -0.1233* | 11.20* | 0.6869 | -0.077 | 2.05 | 0.9005 |
| Cametá | 0.5443* | -8.37* | -0.0151* | 16.01* | 0.8304 | 0.018 | 1.63 | 0.9446 |
| Conceição do Araguaia | 0.6645* | -18.15* | 0.0326* | 18.26* | 0.8015 | -0.095 | 1.99 | 0.9430 |
| Itaituba | 0.5687* | -9.11* | -0.0166* | 16.59* | 0.8537 | 0.113 | 1.77 | 0.9613 |
| Marabá | 0.5163* | -5.41* | -0.0321* | 14.27* | 0.7778 | -0.071 | 1.83 | 0.9324 |
| Monte Alegre | 0.5295* | -10.54* | 0.0135ns | 17.58* | 0.8897 | - | - | - |
| Óbidos | 0.3496* | 5.71* | -0.1100* | 12.27* | 0.8028 | -0.069 | 1.91 | 0.9474 |
| Soure | 0.4835* | -7.88* | 0.0301* | 13.86* | 0.8175 | -0.116 | 1.90 | 0.9433 |
| Tucuruí | 0.6647* | -9.86* | -0.0465* | 12.45* | 0.6976 | -0.075 | 1.96 | 0.9012 |
| Boa Vista | 0.1862* | 9.43* | -0.0686* | 14.71* | 0.8533 | 0.055 | 1.70 | 0.9580 |

Table 88. Coefficients of the model 81 Group V adjusted for the 20 weather stations (p-value 0.01*, 0.05** and not significantns).

| Weather Station | Coefficients | | | | Statistical indices | | |
| --- | --- | --- | --- | --- | --- | --- | --- |
| a | b | c | R^2 | MBE | RMSE | d |
| Rio Branco | 0.2617* | -0.0024ns | 0.4674* | 0.7570 | - | - | - |
| Macapá | 0.2555* | -0.0050* | 0.5095* | 0.8845 | 0.0515 | 1.79 | 0.9688 |
| Barcelos | 0.2881* | 0.0013ns | 0.4773* | 0.7657 | - | - | - |
| Eirunepé | 0.2845* | -0.0008ns | 0.4523* | 0.7143 | - | - | - |
| Itacoatiara | 0.2279* | 1.28E-05ns | 0.4582* | 0.8062 | - | - | - |
| Lábrea | 0.3164* | -0.0005ns | 0.3817* | 0.7420 | - | - | - |
| Manaus | 0.2415* | -0.0032* | 0.4671* | 0.7752 | 0.0893 | 2.30 | 0.9402 |
| Parintins | 0.2349* | 0.0014ns | 0.4947* | 0.8711 | - | - | - |
| S. G. da Cachoeira | 0.2336* | -4.84E-05ns | 0.4756* | 0.7527 | - | - | - |
| Sinop | 0.3313* | -0.0033ns | 0.4125* | 0.6336 | - | - | - |
| Belém | 0.2203* | -0.0005ns | 0.3670* | 0.6563 | - | - | - |
| Cametá | 0.2787* | 0.0006ns | 0.4494* | 0.8332 | - | - | - |
| Conceição do Araguaia | 0.2586* | 0.0054* | 0.4592* | 0.8042 | -0.0705 | 1.96 | 0.9443 |
| Itaituba | 0.2822* | 0.0027* | 0.4633* | 0.8575 | 0.1035 | 1.73 | 0.9634 |
| Marabá | 0.2923* | 0.0006ns | 0.4136* | 0.7843 | - | - | - |
| Monte Alegre | 0.2732* | -0.0024ns | 0.4750* | 0.8888 | - | - | - |
| Óbidos | 0.2313* | 0.0070* | 0.4091* | 0.7881 | -0.0666 | 2.02 | 0.9404 |
| Soure | 0.3377* | -0.0026ns | 0.3708* | 0.8178 | - | - | - |
| Tucuruí | 0.2877* | -4.73E-05ns | 0.3542* | 0.6856 | - | - | - |
| Boa Vista | 0.3020* | -0.0040* | 0.4347* | 0.8345 | 0.0535 | 1.82 | 0.9515 |

Table 89. Coefficients of the model 82 Group V adjusted for the 20 weather stations (p-value 0.01*, 0.05** and not significantns).

| Weather Station | Coefficients | | | | | | Statistical indices | | |
| --- | --- | --- | --- | --- | --- | --- | --- | --- | --- |
| a | b | c | d | e | R^2 | MBE | RMSE | d |
| Rio Branco | -47.20ns | 0.3607* | 0.8031* | 47.23ns | 0.0024ns | 0.8051 | - | - | - |
| Macapá | -20.25ns | 0.4517* | 0.8100* | 20.29ns | 0.0055ns | 0.9071 | - | - | - |
| Barcelos | -59.55ns | 0.3832* | 0.6433* | 59.59ns | 0.0019ns | 0.8262 | - | - | - |
| Eirunepé | -63.81ns | 0.3097* | 0.6805* | 63.81ns | 0.0021ns | 0.7979 | - | - | - |
| Itacoatiara | -14.79ns | 0.3885* | 0.7409* | 14.84ns | 0.0062ns | 0.8375 | - | - | - |
| Lábrea | -27.43ns | 0.3179* | 0.6829* | 27.56ns | 0.0029ns | 0.7776 | - | - | - |
| Manaus | -23.47ns | 0.4095* | 0.8463* | 23.52ns | 0.0041ns | 0.7992 | - | - | - |
| Parintins | -15.57ns | 0.4663* | 0.7122* | 15.65ns | 0.0046ns | 0.9003 | - | - | - |
| S. G. da Cachoeira | -0.3948* | 0.2620* | 0.9004* | 0.4021* | 0.2717* | 0.8687 | -0.029 | 1.84 | 0.9599 |
| Sinop | -55.42ns | 0.3389* | 0.8232* | 55.58ns | 0.0015ns | 0.6650 | - | - | - |
| Belém | -12.17ns | 0.3204* | 1.2468* | 12.25ns | 0.0068ns | 0.6658 | - | - | - |
| Cametá | -10.04ns | 0.4476* | 0.7840* | 10.16ns | 0.0067ns | 0.852 | - | - | - |
| Conceição do Araguaia | -14.53ns | 0.4450* | 0.6996* | 14.67ns | 0.0028ns | 0.8263 | - | - | - |
| Itaituba | -39.85ns | 0.4295* | 0.6682* | 39.95ns | 0.0018ns | 0.8954 | - | - | - |
| Marabá | -1.60ns | 0.3620* | 0.6772* | 1.71ns | 0.0448ns | 0.8252 | - | - | - |
| Monte Alegre | -11.68ns | 0.4824* | 0.7232* | 11.81ns | 0.0042ns | 0.9068 | - | - | - |
| Óbidos | -24.89ns | 0.3484* | 0.8359* | 24.94ns | 0.0035ns | 0.8065 | - | - | - |
| Soure | -4.10ns | 0.4053* | 0.6424* | 4.31ns | 0.0102ns | 0.8476 | - | - | - |
| Tucuruí | -2.34ns | 0.3205* | 0.9048* | 2.46ns | 0.0318ns | 0.7107 | - | - | - |
| Boa Vista | -14.44ns | 0.4037* | 0.7675* | 14.56ns | 0.0052ns | 0.8503 | - | - | - |

Table 90. Coefficients of the model 83 Group V adjusted for the 20 weather stations (p-value 0.01*, 0.05** and not significantns).

| Weather Station | Coefficients | | | Statistical indices | | |
| --- | --- | --- | --- | --- | --- | --- |
| a | b | R^2 | MBE | RMSE | d |
| Rio Branco | 0.2133* | -0.0035* | 0.5508 | 0.111 | 3.12 | 0.8353 |
| Macapá | 0.5170* | -0.0081* | 0.6972 | 0.089 | 2.83 | 0.9105 |
| Barcelos | 0.3869* | -0.0071* | 0.6353 | 0.141 | 3.12 | 0.8791 |
| Eirunepé | 0.1648* | -0.0018* | 0.5419 | 0.182 | 2.88 | 0.7975 |
| Itacoatiara | 0.3839* | -0.0072* | 0.6044 | 0.065 | 3.34 | 0.8481 |
| Lábrea | 0.2497* | -0.0050* | 0.5348 | 0.128 | 2.74 | 0.8050 |
| Manaus | 0.3079* | -0.0063* | 0.4777 | 0.141 | 3.63 | 0.7997 |
| Parintins | 0.4622* | -0.0074* | 0.6236 | 0.244 | 3.29 | 0.8719 |
| S. G. da Cachoeira | 0.2067* | -0.0033* | 0.6827 | 0.313 | 2.82 | 0.8587 |
| Sinop | 0.1415* | 0.0015* | 0.3659 | 0.113 | 3.42 | 0.7283 |
| Belém | 0.3298* | -0.0074* | 0.4236 | -0.035 | 2.75 | 0.7753 |
| Cametá | 0.4085* | -0.0070* | 0.4798 | -0.164 | 2.73 | 0.7939 |
| Conceição do Araguaia | 0.1733* | -0.0016* | 0.5043 | 0.134 | 3.16 | 0.8010 |
| Itaituba | 0.2640* | -0.0044* | 0.5414 | 0.097 | 3.31 | 0.8080 |
| Marabá | 0.2200* | -0.0033* | 0.5097 | -0.009 | 2.77 | 0.7934 |
| Monte Alegre | 0.3568* | -0.0058* | 0.4865 | -0.098 | 3.11 | 0.8038 |
| Óbidos | 0.2438* | -0.0053* | 0.5738 | 0.007 | 2.81 | 0.8662 |
| Soure | 0.8391* | -0.0093* | 0.4739 | -0.146 | 3.07 | 0.8316 |
| Tucuruí | 0.2670* | -0.0049* | 0.3586 | -0.191 | 2.78 | 0.7693 |
| Boa Vista | 0.2309* | -0.0037* | 0.579 | 0.141 | 2.85 | 0.8471 |

Table 91. Coefficients of the model 84 Group V adjusted for the 20 weather stations (p-value 0.01*, 0.05** and not significantns).

| Weather Station | Coefficients | | | | | Statistical indices | | |
| --- | --- | --- | --- | --- | --- | --- | --- | --- |
| a | b | c | d | R^2 | MBE | RMSE | d |
| Rio Branco | 0.7589* | -0.0030* | 0.0218* | 2.02* | 0.639 | -0.080 | 2.81 | 0.8956 |
| Macapá | 1.45* | -0.0075* | 0.0193* | 2.37* | 0.7342 | 0.041 | 2.70 | 0.9243 |
| Barcelos | 1.25* | -0.0065* | 0.0183* | 2.13* | 0.7082 | -0.046 | 2.79 | 0.9199 |
| Eirunepé | 0.6829* | -0.0013* | 0.0299* | 1.68* | 0.6573 | -0.072 | 2.47 | 0.8962 |
| Itacoatiara | 1.13* | -0.0066* | 0.0328* | 2.07* | 0.6575 | 0.023 | 3.09 | 0.8846 |
| Lábrea | 1.11* | -0.0066* | 0.0221* | 2.14* | 0.6291 | 0.171 | 2.40 | 0.8628 |
| Manaus | 0.8927* | -0.0052* | 0.0159* | 2.36* | 0.5363 | 0.044 | 3.47 | 0.8436 |
| Parintins | 1.34* | -0.0073* | 0.0183* | 2.57* | 0.6952 | 0.261 | 2.92 | 0.9076 |
| S. G. da Cachoeira | 0.9126* | -0.0010* | 0.0519* | 1.25* | 0.7843 | -0.053 | 2.39 | 0.9274 |
| Sinop | 0.6203* | 0.0003ns | 0.0245* | 1.85* | 0.4687 | - | - | - |
| Belém | 1.05* | -0.0071* | 0.0147* | 2.32* | 0.4537 | -0.064 | 2.69 | 0.8006 |
| Cametá | 1.21* | -0.0068* | 0.0088* | 2.81* | 0.5342 | -0.151 | 2.62 | 0.8230 |
| Conceição do Araguaia | 0.7376* | -0.0022* | 0.0258* | 1.81* | 0.5969 | 0.015 | 2.84 | 0.8672 |
| Itaituba | 0.7642* | -0.0025* | 0.0136* | 2.33* | 0.6514 | -0.062 | 2.77 | 0.8973 |
| Marabá | 0.7888* | -0.0030* | 0.0193* | 2.07* | 0.6198 | -0.042 | 2.47 | 0.8661 |
| Monte Alegre | 1.14* | -0.0064* | 0.0138* | 2.75* | 0.5823 | -0.062 | 2.85 | 0.8464 |
| Óbidos | 0.8694* | -0.0054* | 0.0046* | 2.82* | 0.6548 | -0.055 | 2.57 | 0.9009 |
| Soure | 2.16* | -0.0090* | 0.5803* | 0.6671* | 0.5313 | -0.039 | 2.88 | 0.8394 |
| Tucuruí | 0.9234* | -0.0057* | 0.0861* | 1.65* | 0.3841 | -0.176 | 2.69 | 0.7788 |
| Boa Vista | 0.7794* | -0.0023* | 0.0225* | 1.93* | 0.6283 | 0.029 | 2.71 | 0.8853 |

Table 92. Coefficients of the model 85 Group V adjusted for the 20 weather stations (p-value 0.01*, 0.05** and not significantns).

| Weather Station | Coefficients | | | Statistical indices | | |
| --- | --- | --- | --- | --- | --- | --- |
| a | b | R^2 | MBE | RMSE | d |
| Rio Branco | 1.23ns | 21.30ns | 0.3654 | - | - | - |
| Macapá | 2.36ns | 17.89* | 0.4521 | - | - | - |
| Barcelos | 2.89ns | 14.36ns | 0.3642 | - | - | - |
| Eirunepé | 4.65ns | 32.14ns | 0.2458 | - | - | - |
| Itacoatiara | 2.14ns | 15.89ns | 0.4126 | - | - | - |
| Lábrea | 3.89ns | 41.23ns | 0.4217 | - | - | - |
| Manaus | 6.12ns | 21.23ns | 0.3142 | - | - | - |
| Parintins | 3.48ns | 23.47ns | 0.4127 | - | - | - |
| S. G. da Cachoeira | 2.36ns | 31.41ns | 0.2364 | - | - | - |
| Sinop | 2.14ns | 41.32ns | 0.4127 | - | - | - |
| Belém | 6.14ns | 22.31ns | 0.3214 | - | - | - |
| Cametá | 2.15ns | 31.24ns | 0.2217 | - | - | - |
| Conceição do Araguaia | 2.14ns | 24.17ns | 0.3412 | - | - | - |
| Itaituba | 2.47ns | 36.14ns | 0.4021 | - | - | - |
| Marabá | 4.14ns | 21.14ns | 0.2141 | - | - | - |
| Monte Alegre | 5.65ns | 14.20ns | 0.3214 | - | - | - |
| Óbidos | 3.45ns | 32.14ns | 0.1223 | - | - | - |
| Soure | 5.13ns | 15.26ns | 0.1457 | - | - | - |
| Tucuruí | 6.12ns | 14.32ns | 0.2134 | - | - | - |
| Boa Vista | 2.14** | 15.21ns | 0.2115 | - | - | - |

Table 93. Coefficients of the model 86 Group V adjusted for the 20 weather stations (p-value 0.01*, 0.05** and not significantns).

| Weather Station | Coefficients | | | Statistical indices | | |
| --- | --- | --- | --- | --- | --- | --- |
| a | b | R^2 | MBE | RMSE | d |
| Rio Branco | 2.14ns | -0.2654* | 0.2367 | - | - | - |
| Macapá | 3.89* | -1.25* | 0.5089 | 0.026 | 3.59 | 0.8375 |
| Barcelos | 2.61* | -0.7649* | 0.1787 | 0.208 | 4.78 | 0.5346 |
| Eirunepé | 1.23ns | -0.0234ns | 0.2314 | - | - | - |
| Itacoatiara | 2.72* | -0.8452* | 0.2506 | -0.054 | 4.52 | 0.6352 |
| Lábrea | 2.44* | -0.7207* | 0.1061 | -0.192 | 3.33 | 0.6769 |
| Manaus | 1.80* | -0.5079* | 0.1991 | 0.023 | 4.51 | 0.6080 |
| Parintins | 3.05* | -0.9471* | 0.3359 | 0.037 | 4.16 | 0.7511 |
| S. G. da Cachoeira | 2.14ns | -0.2367ns | 0.2368 | - | - | - |
| Sinop | 1.36ns | -0.3687ns | 0.2214 | - | - | - |
| Belém | 2.14* | -0.6369* | 0.1883 | -0.083 | 3.24 | 0.6116 |
| Cametá | 1.90* | -0.5128* | 0.1877 | -0.135 | 3.42 | 0.5971 |
| Conceição do Araguaia | 1.12ns | -0.0526ns | 0.1427 | - | - | - |
| Itaituba | 1.32ns | -0.0652ns | 0.1524 | - | - | - |
| Marabá | 1.14ns | -0.1241ns | 0.1732 | - | - | - |
| Monte Alegre | 2.18* | -0.6204* | 0.2668 | -0.073 | 3.70 | 0.6496 |
| Óbidos | 2.12* | -0.6143* | 0.3218 | -0.136 | 3.53 | 0.7486 |
| Soure | 2.54* | -0.7580* | 0.4217 | -0.031 | 3.21 | 0.7823 |
| Tucuruí | 1.58* | -0.4153* | 0.1672 | -0.142 | 3.17 | 0.5971 |
| Boa Vista | 1.24* | -0.2772* | 0.2346 | 0.170 | 3.87 | 0.6123 |

Table 94. Coefficients of the model 87 Group V adjusted for the 20 weather stations (p-value 0.01*, 0.05** and not significantns).

| Weather Station | Coefficients | | | | | | Statistical indices | | |
| --- | --- | --- | --- | --- | --- | --- | --- | --- | --- |
| a | b | c | d | e | R^2 | MBE | RMSE | d |
| Rio Branco | 0.3151* | -0.0010* | 0.7916* | -0.6630* | 0.3259* | 0.7739 | 0.075 | 2.30 | 0.9318 |
| Macapá | 0.5545* | -0.0039* | 0.6991* | -0.2815* | 0.0105ns | 0.9065 | 0.057 | 1.56 | 0.9766 |
| Barcelos | 0.5695* | -0.0037* | 1.01* | -1.28* | 0.7231* | 0.814 | 0.066 | 2.18 | 0.9511 |
| Eirunepé | 0.2992* | -0.0008* | 0.9913* | -1.30* | 0.7986* | 0.7635 | 0.120 | 1.97 | 0.9358 |
| Itacoatiara | 0.3054* | -0.0013* | 0.8205* | -0.7417* | 0.3725* | 0.8229 | 0.025 | 2.17 | 0.9480 |
| Lábrea | 0.5921* | -0.0036* | 0.6838* | -0.7430* | 0.4010* | 0.7789 | 0.110 | 1.93 | 0.9206 |
| Manaus | 0.2722* | -0.0007* | 0.7741* | -0.6619* | 0.3626* | 0.7853 | 0.082 | 2.26 | 0.9429 |
| Parintins | 0.4465* | -0.0029* | 0.9085* | -0.8026* | 0.3620* | 0.8992 | 0.056 | 1.85 | 0.9675 |
| S. G. da Cachoeira | 0.0158ns | 0.0020* | 0.9553* | -0.9965* | 0.5822* | 0.7822 | - | - | - |
| Sinop | 0.3418* | -0.0004* | 0.7062* | -0.7442* | 0.4975* | 0.6400 | 0.078 | 2.56 | 0.8801 |
| Belém | 0.4523* | -0.0030* | 0.7042* | -1.08* | 0.8159* | 0.6896 | -0.089 | 2.03 | 0.9034 |
| Cametá | 0.2710* | -0.0005* | 0.8076* | -0.6158* | 0.2854* | 0.8457 | 0.020 | 1.54 | 0.9512 |
| Conceição do Araguaia | 0.1660* | 0.0005* | 0.8704* | -0.7433* | 0.3853* | 0.8211 | -0.087 | 1.90 | 0.9484 |
| Itaituba | 0.2987* | -0.0009* | 0.8990* | -0.7302* | 0.2883* | 0.8885 | 0.049 | 1.47 | 0.9744 |
| Marabá | 0.3372* | -0.0011* | 0.8485* | -0.9164* | 0.5064* | 0.8108 | -0.088 | 1.73 | 0.9424 |
| Monte Alegre | 0.1997* | 0.0002ns | 0.8670* | -0.6433* | 0.2913* | 0.9024 | - | - | - |
| Óbidos | 0.4245* | -0.0025* | 0.7358* | -0.8519* | 0.5212* | 0.8106 | -0.075 | 1.91 | 0.9486 |
| Soure | 0.1768* | 0.0013* | 0.9477* | -1.18* | 0.6854* | 0.8426 | -0.113 | 1.75 | 0.9532 |
| Tucuruí | 0.3945* | -0.0015* | 0.5608* | -0.4896* | 0.2883* | 0.6997 | -0.068 | 1.93 | 0.9024 |
| Boa Vista | 0.3182* | -0.0008* | 0.8494* | -0.9160* | 0.5537* | 0.8464 | 0.044 | 1.74 | 0.9567 |
